# Supplementary material for: Semi-heterogeneous dual iron/photocatalytic decarboxylative C(sp 3 )–C(sp 3 ) cross-coupling via radical sorting
Source: Royal Society of Chemistry journal article supplement (doi:10.1039/d5gc05705a), 2026-01-01
Supplement: d5gc05705a1.pdf [file d5gc05705a1.pdf]

## Semi-heterogeneous Dual Iron/Photocatalytic Decarboxylative C(sp<sup>3</sup>)-C(sp<sup>3</sup>) Cross-Coupling via Radical Sorting

Yajun Sun,<sup>a</sup> Tengfei Kang,<sup>a,\*</sup> Yingdi Feng,<sup>a</sup> Huaming Sun,<sup>a</sup> Geyang Song,<sup>a</sup> and Dong Xue<sup>a,\*</sup>

*<sup>a</sup>Key Laboratory of Applied Surface and Colloid Chemistry, Ministry of Education, Institute of New Concept Sensors and Molecular Materials, School of Chemistry and Chemical Engineering, Shaanxi Normal University, Xi'an, 710119, People's Republic of China.*

\*e-mail: [tfkang@snnu.edu.cn](mailto:tfkang@snnu.edu.cn); [xuedong\\_welcome@snnu.edu.cn](mailto:xuedong_welcome@snnu.edu.cn)

### Contents

|                                                       |    |
|-------------------------------------------------------|----|
| 1. General Information.....                           | 1  |
| 2. Optimization of reaction conditions.....           | 2  |
| 3. Preparation of mpg-CN and raw materials.....       | 6  |
| 4. General procedure for the catalytic reactions..... | 11 |
| 5. Mechanism research.....                            | 12 |
| 6. References.....                                    | 49 |
| 7. NMR spectral data for compounds .....              | 51 |

## 1. General Information

All reactions were performed under argon atmosphere with glass storage tube unless otherwise stated. Reagents were purchased from commercial sources and were used as received. Solvents were purified by VG-P7 solvent drying system or commercial dry solvent. Thin layer chromatography (TLC) was performed to monitor reactions by UV light (254 nm) or phosphomolybdate chromogenic agent. Silica gel column chromatography was performed using 200-300 Mesh silica gel.

The reaction tube used in the experiment was a 10 mL liquid storage sealed tube with a polytetrafluoroethylene thread plug. The photoreactor was an optical parallel reaction instrument produced by Shanghai Shanshi Technology SSSTECH-AF3. (Figure S1).

$^1\text{H}$  NMR spectra and  $^{13}\text{C}$  NMR spectra were recorded at 400 MHz, 100 MHz on a Bruker Avance 400 spectrometer. All chemical shifts in  $^1\text{H}$  NMR spectra are reported in parts per million (ppm) relative to residual  $\text{CDCl}_3$  (7.26 ppm) as internal standards.  $^1\text{H}$  NMR data are reported as follows: chemical shift, multiplicity (s = singlet, d = doublet, q = quartet, m = multiplet, dd = doublet of doublets, dt = doublet of triplets, br = broad), the number of protons (n) for a given resonance was indicated by nH. Coupling constants were reported as a J value in Hz.  $^{19}\text{F}$  NMR chemical shifts were reported in ppm.  $^{13}\text{C}$  NMR chemical shifts are reported in ppm relative to the central peak of  $\text{CDCl}_3$  (77.16 ppm) as internal standards. HRMS data were obtained by ESI or APCI method with Bruker mass spectrometer (MAXIS). EPR were recorded with Bruker E500 electron paramagnetic spectrometer. UV-Vis absorption spectra were collected on a PerkinElmer Lambda 365 UV-VIS Spectrophotometer. The X-Ray Diffraction (XRD) patterns were collected on Rigaku D/Max2550VB+/PC (Cu  $\text{K}\alpha$  source) at a scan rate of  $2.4^\circ \text{ min}^{-1}$ . Scanning Electron Microscopy (SEM) images were obtained on a field emission scanning electron microscope (HITACHI SU8220 microscope) at an acceleration voltage and the applied current of 5 kV and 10  $\mu\text{A}$ . For the SEM test, the powder samples were glued on an aluminium SEM specimen holder with the conductive resin, and then the specimen holder was directly put into SEM for testing without gold spraying. X-Ray Photoelectron Spectroscopy (XPS) spectra were determined on a VG ESCALAB 250 XPS system with a monochromatized Al  $\text{K}\alpha$  X-ray source (15 kV, 200 W). The BET test was performed on a fully automatic specific surface area and pore analyzer, model ASAP2460.

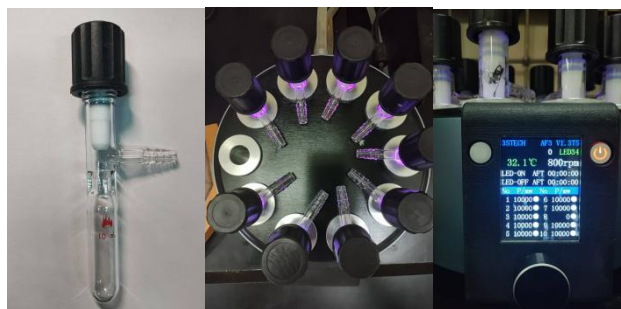

**Figure S1.** Pictures of photoreactors

(Note: The temperature of the reaction mixture is room temperature due to return water, and the reactor has no external heating devices)

## 2. Optimization of reaction conditions

**Table S1.** Screening of solvent.

| Entry | Solvent            | Yield (%) |       |       |
|-------|--------------------|-----------|-------|-------|
|       |                    | 3         | 3a    | 3b    |
| 1     | MeCN               | 56        | 10    | 16    |
| 2     | THF                | 33        | 10    | 25    |
| 3     | MTBE               | 54        | 19    | 12    |
| 4     | acetone            | 48        | 7     | 20    |
| 5     | 1,4-Dioxane        | 24        | 18    | 21    |
| 6     | DMSO               | 6         | trace | trace |
| 7     | <b>MeCN + MTBE</b> | 65        | 9     | 12    |
| 8     | MeCN + DCE         | 32        | 5     | 27    |
| 9     | MeCN + acetone     | 41        | 8     | 23    |
| 10    | MeCN + EA          | 50        | 8     | 20    |

Reaction conditions: **1** (0.2 mmol), **2** (1.2 equiv.), mpg-CN (5 mg/mL), Fe(TPP)Cl (15 mol%), K<sub>2</sub>CO<sub>3</sub> (1.5 equiv.), solvent (0.1 M), 390-395 nm, Ambient temperature refers to 28-33 °C, 12 h, Ar. Yields were determined by <sup>1</sup>H NMR analysis using 1,3,5-trimethoxybenzene as internal standard.

**Table S2.** Screening of Fe catalyst.

| Entry | [M]       | Yield (%) |    |    |
|-------|-----------|-----------|----|----|
|       |           | 3         | 3a | 3b |
| 1     | Fe(TPP)Cl | 65        | 9  | 12 |
| 2     | Fe(OEP)Cl | 65        | 11 | 12 |
| 3     | Co(TPP)Cl | 11        | 56 | 14 |
| 4     | Mn(TPP)Cl | 20        | 12 | 33 |
| 5     | Ni(TPP)Cl | 20        | 21 | 17 |

Reaction conditions: **1** (0.2 mmol), **2** (1.2 equiv.), mpg-CN (5 mg/mL), Fe catalyst (15 mol%), K<sub>2</sub>CO<sub>3</sub> (1.5 equiv.), MeCN : MTBE = 1:1 (0.1 M), 390-395 nm, Ambient temperature refers to 28-33 °C, 12 h, Ar. Yields were determined by <sup>1</sup>H NMR analysis using 1,3,5-trimethoxybenzene as internal standard.

**Table S3.** Screening of Fe(TPP)Cl loading.

| Entry | x  | Yield (%) |    |    |
|-------|----|-----------|----|----|
|       |    | 3         | 3a | 3b |
| 1     | 5  | 61        | 7  | 15 |
| 2     | 10 | 72        | 7  | 10 |
| 3     | 15 | 65        | 9  | 12 |
| 4     | 20 | 63        | 8  | 14 |

Reaction conditions: **1** (0.2 mmol), **2** (1.2 equiv.), mpg-CN (5 mg/mL), Fe catalyst (x mol%), K<sub>2</sub>CO<sub>3</sub> (1.5 equiv.), MeCN : MTBE = 1:1 (0.1 M), 390-395 nm, Ambient temperature refers to 28-33 °C, 12 h, Ar. Yields were determined by <sup>1</sup>H NMR analysis using 1,3,5-trimethoxybenzene as internal standard.

**Table S4.** Screening of carbon nitride (CN).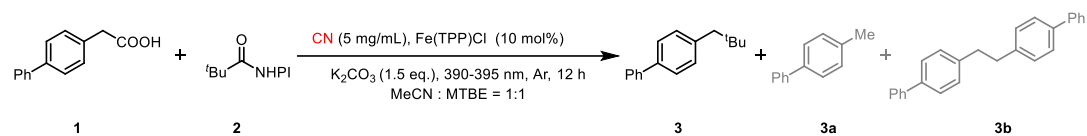

| Entry | CN                              | Yield (%) |    |    |
|-------|---------------------------------|-----------|----|----|
|       |                                 | 3         | 3a | 3b |
| 1     | mpg-CN                          | 72        | 7  | 10 |
| 2     | mpg-CN-Q                        | 35        | 4  | 20 |
| 3     | g-C <sub>3</sub> N <sub>4</sub> | 32        | 6  | 10 |
| 4     | CN-OA-m                         | 56        | 7  | 17 |
| 5     | BiVO <sub>4</sub>               | 33        | 10 | 6  |

Reaction conditions: **1** (0.2 mmol), **2** (1.2 equiv.), CN (5 mg/mL), Fe(TPP)Cl (10 mol%), K<sub>2</sub>CO<sub>3</sub> (1.5 equiv.), MeCN : MTBE = 1:1 (0.1 M), 390-395 nm, Ambient temperature refers to 28-33 °C, 12 h, Ar. Yields were determined by <sup>1</sup>H NMR analysis using 1,3,5-trimethoxybenzene as internal standard.

**Table S5.** Screening of the base.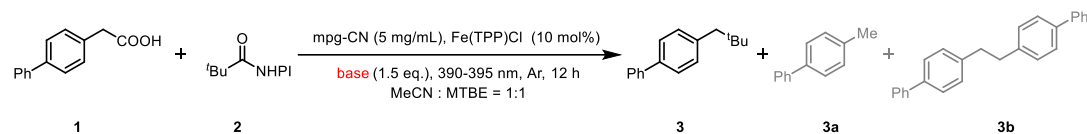

| Entry | base                            | Yield (%) |       |       |
|-------|---------------------------------|-----------|-------|-------|
|       |                                 | 3         | 3a    | 3b    |
| 1     | K <sub>2</sub> CO <sub>3</sub>  | 72        | 7     | 10    |
| 2     | Cs <sub>2</sub> CO <sub>3</sub> | 65        | 10    | 10    |
| 3     | K <sub>3</sub> PO <sub>4</sub>  | 66        | 9     | 12    |
| 4     | K <sub>2</sub> HPO <sub>4</sub> | 48        | 7     | 15    |
| 5     | KOH                             | 24        | 44    | 12    |
| 6     | DIPEA                           | 41        | 40    | 9     |
| 7     | DBU                             | trace     | trace | trace |
| 8     | Et <sub>3</sub> N               | 19        | 49    | 12    |
| 9     | DMTHPM                          | 17        | 20    | 19    |

Reaction conditions: **1** (0.2 mmol), **2** (1.2 equiv.), mpg-CN (5 mg/mL), Fe(TPP)Cl (10 mol%), base (1.5 equiv.), MeCN : MTBE = 1:1 (0.1 M), 390-395 nm, Ambient temperature refers to 28-33 °C, 12 h, Ar. Yields were determined by <sup>1</sup>H NMR analysis using 1,3,5-trimethoxybenzene as internal standard.

**Table S6.** Screening of optical power.

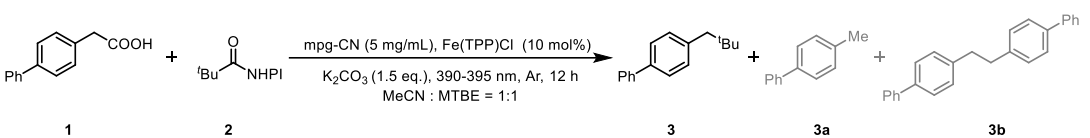

| Entry | 390-395 nm | Yield (%) |    |    |
|-------|------------|-----------|----|----|
|       |            | 3         | 3a | 3b |
| 1     | 15 W       | 72        | 7  | 10 |
| 2     | 10 W       | 72        | 6  | 9  |
| 3     | 5 W        | 66        | 8  | 13 |
| 4     | 2 W        | 63        | 6  | 11 |

Reaction conditions: **1** (0.2 mmol), **2** (1.2 equiv.), mpg-CN (5 mg/mL), Fe(TPP)Cl (10 mol%), K<sub>2</sub>CO<sub>3</sub> (1.5 equiv.), MeCN : MTBE = 1:1 (0.1 M), 390-395 nm, Ambient temperature refers to 28-33 °C, 12 h, Ar. Yields were determined by <sup>1</sup>H NMR analysis using 1,3,5-trimethoxybenzene as internal standard.

**Table S7.** Screening of reaction time.

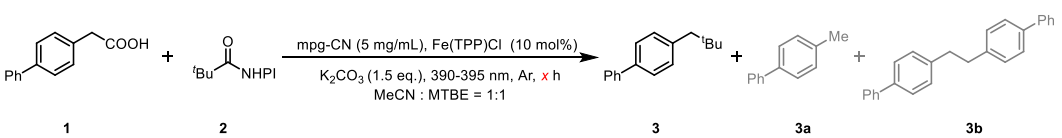

| Entry | Time (h) | Yield (%) |    |    |
|-------|----------|-----------|----|----|
|       |          | 3         | 3a | 3b |
| 1     | 6        | 62        | 8  | 9  |
| 2     | 8        | 63        | 10 | 10 |
| 3     | 10       | 72        | 6  | 10 |
| 4     | 12       | 72        | 6  | 9  |

Reaction conditions: **1** (0.2 mmol), **2** (1.2 equiv.), mpg-CN (5 mg/mL), Fe(TPP)Cl (10 mol%), base (1.5 equiv.), MeCN : MTBE = 1:1 (0.1 M), 390-395 nm, Ambient temperature refers to 28-33 °C, x h, Ar. Yields were determined by <sup>1</sup>H NMR analysis using 1,3,5-trimethoxybenzene as internal standard.

**Table S8.** Screening of different light sources.

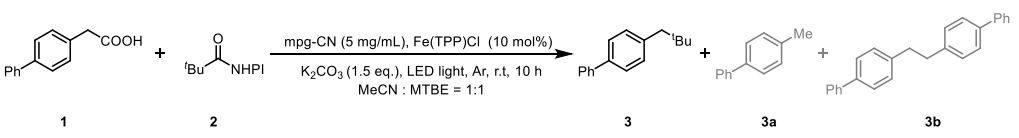

| Entry | LED light  | Yield (%) |       |       |
|-------|------------|-----------|-------|-------|
|       |            | 3         | 3a    | 3b    |
| 1     | 390-395 nm | 72        | 6     | 9     |
| 2     | 460-465 nm | 33        | 4     | 16    |
| 3     | 530-535 nm | 8         | 2     | 8     |
| 4     | 620-630 nm | trace     | trace | trace |

Reaction conditions: **1** (0.2 mmol), **2** (1.2 equiv.), mpg-CN (5 mg/mL), Fe(TPP)Cl (10 mol%), K<sub>2</sub>CO<sub>3</sub> (1.5 equiv.), MeCN : MTBE = 1:1 (0.1 M), 390-395 nm, Ambient temperature refers to 28-33 °C, 10 h, Ar. Yields were determined by <sup>1</sup>H NMR analysis using 1,3,5-trimethoxybenzene as internal standard.

**Table S9.** Control experiments.

| Entry | Deviation from the standard conditions | Yield (%) |           |           |
|-------|----------------------------------------|-----------|-----------|-----------|
|       |                                        | <b>3</b>  | <b>3a</b> | <b>3b</b> |
| 1     | none                                   | 72        | 6         | 9         |
| 2     | no light                               | n.r       | n.r       | n.r       |
| 3     | no mpg-CN                              | 15        | 1         | 6         |
| 4     | no Fe                                  | 23        | 19        | 26        |
| 5     | no K <sub>2</sub> CO <sub>3</sub>      | 29        | 6         | 9         |
| 6     | air                                    | trace     | n.r       | n.r       |

Reaction conditions: **1** (0.2 mmol), **2** (1.2 equiv.), mpg-CN (5 mg/mL), Fe(TPP)Cl (10 mol%), K<sub>2</sub>CO<sub>3</sub> (1.5 equiv.), MeCN : MTBE = 1:1 (0.1 M) , 390-395 nm, Ambient temperature refers to 28-33 °C, 10 h, Ar. Yields were determined by <sup>1</sup>H NMR analysis using 1,3,5-trimethoxybenzene as internal standard.

### 3. Preparation of mpg-CN and raw materials.

#### 3.1 Preparation of mpg-CN.

mpg-CN was synthesized according to the literature procedure<sup>[1]</sup>. A mixture of cyanamide (3.00 g) and colloidal silica aqueous solution (Ludox HS-40, 40 wt.%, 7.50 g) was stirred in a glass vial at room temperature for about 15 minutes until cyanamide was dissolved completely. Water was slowly evaporated upon stirring the mixture overnight at 60 °C. Magnetic stirring bar was removed and the white solid was transferred into a porcelain crucible and calcinated at 550 °C for ca. 4 h under flow of nitrogen in a muffle oven. The oven was allowed to cool to room temperature, the content from the crucible was transferred into a polypropylene bottle, The resulting brown-yellow powder was treated with a 4 M NH<sub>4</sub>HF<sub>2</sub> for 24 h to remove the silica template. The powders were then centrifuged and washed three times with distilled water and twice with ethanol, and dried overnight in a vacuum oven (60 °C).

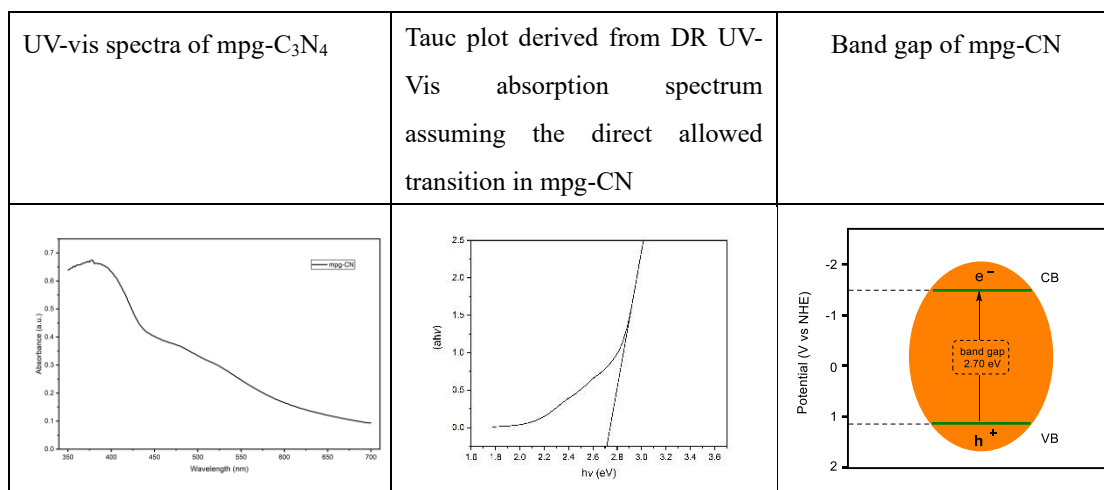

**Figure S2** Characterization of mpg-CN

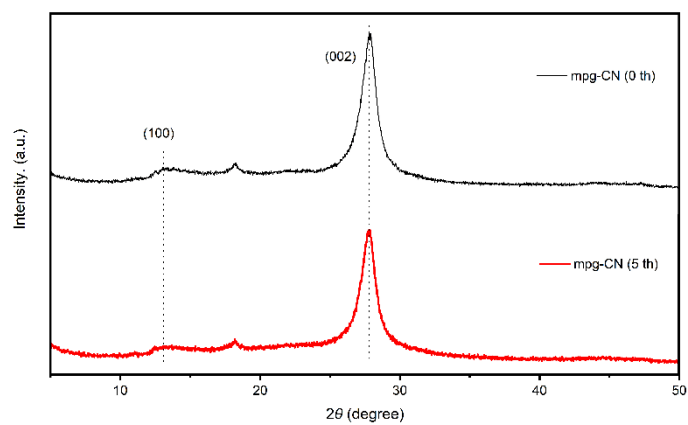

**Figure S3** Powder X-Ray diffraction pattern of mpg-CN

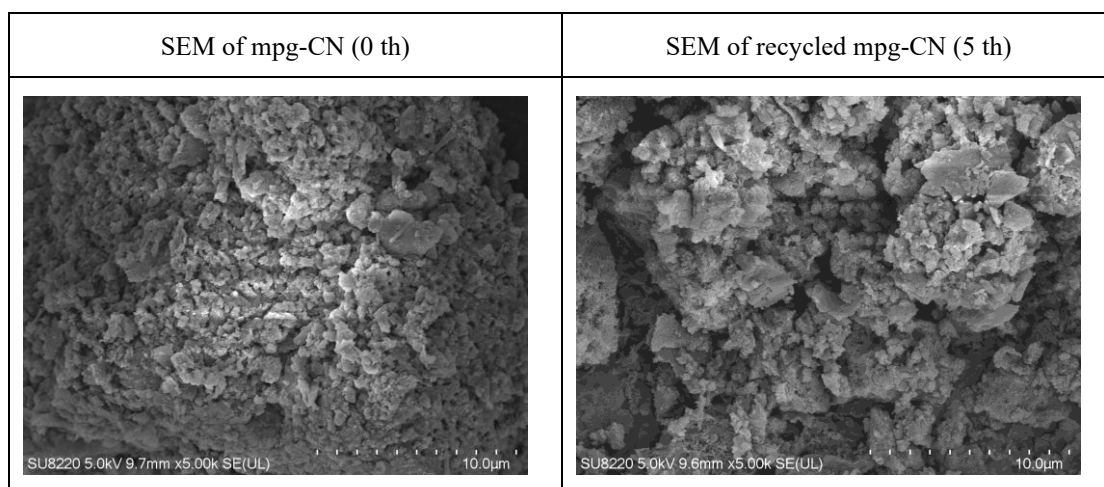

**Figure S4** SEM of mpg-CN

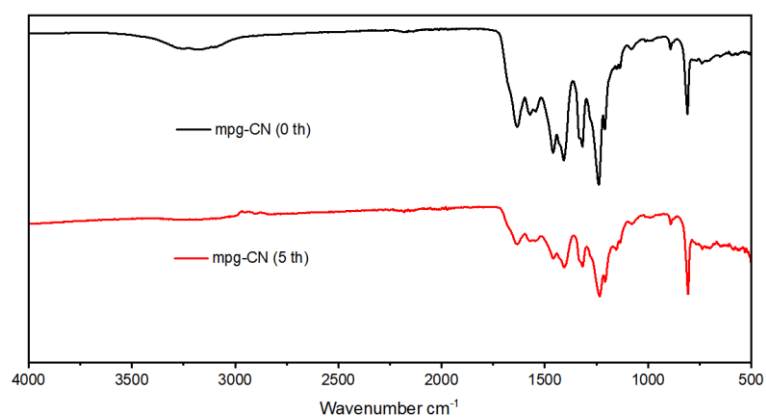

**Figure S5** FTIR spectra of mpg-CN

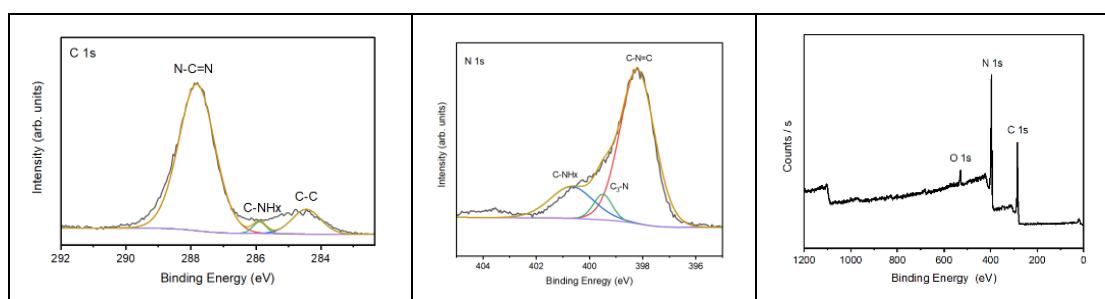

**Figure S6** XPS of mpg-CN (0 th)

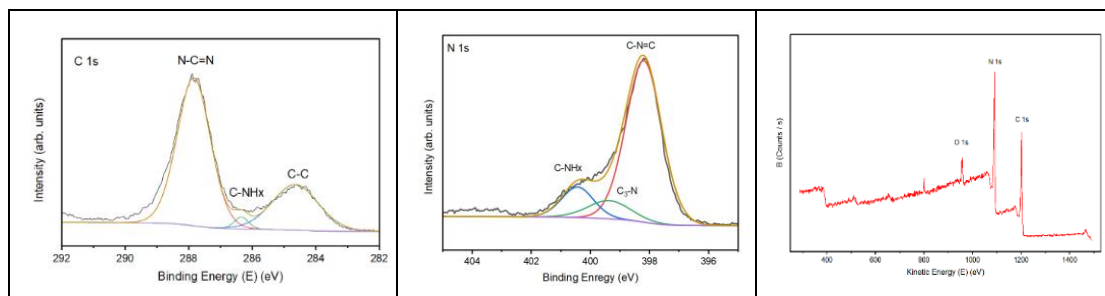

**Figure S7** XPS of recycled mpg-CN (5th)

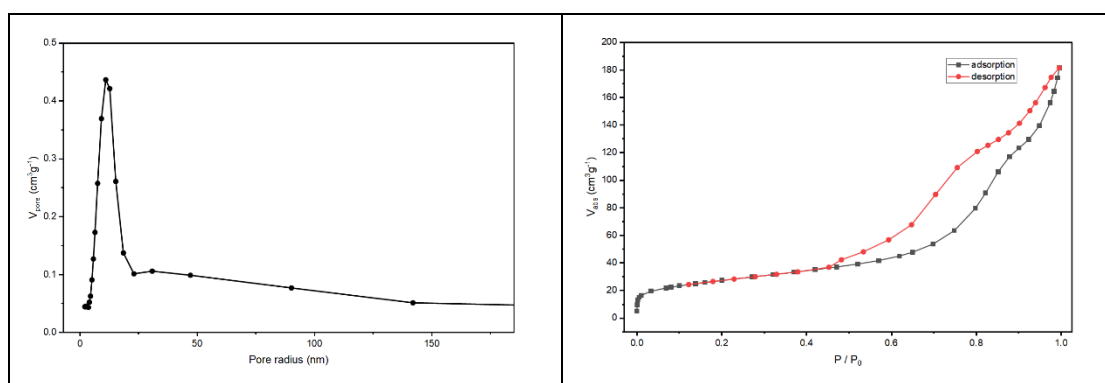

**Figure S8** BET of mpg-CN (0 th)

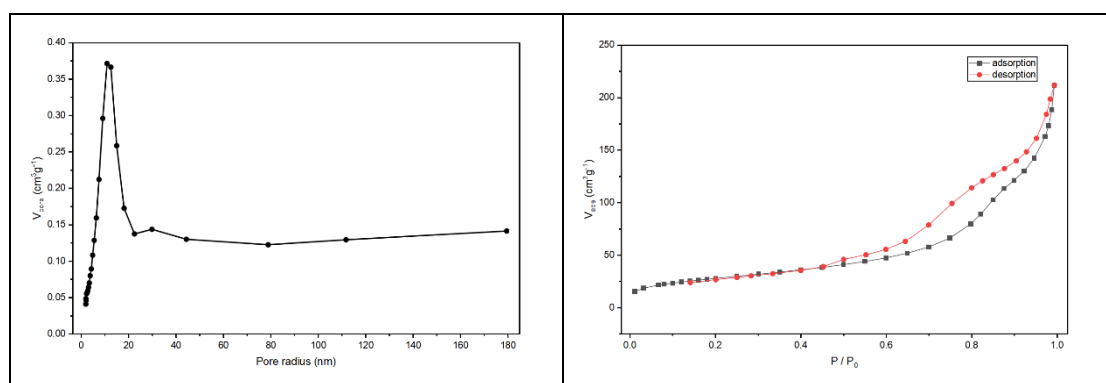

**Figure S9** BET of recycled mpg-CN (5 th)

### 3.2 General procedure for preparation of redox active esters (RAEs).

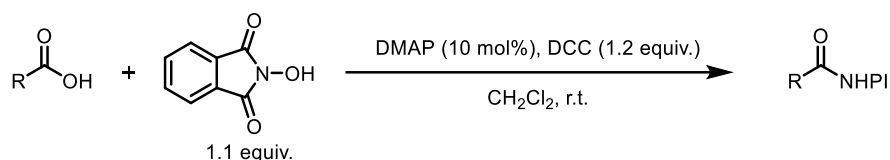

RAEs were prepared using alkyl carboxylic acid as starting materials according to the literature procedure.<sup>[2]</sup> The corresponding alkyl carboxylic acid (10.0 mmol, 1.0 equiv.), *N*-hydroxyphthalimide (11.0 mmol, 1.1 equiv.), and 4-dimethylaminopyridine (1.0 mmol, 10 mol%) were mixed in a flask with a magnetic stirring bar. Dry  $\text{CH}_2\text{Cl}_2$  (40 mL) was added. Then a solution of *N,N'*-dicyclohexylcarbodiimide (11.0 mmol, 1.1 equiv.) in  $\text{CH}_2\text{Cl}_2$  (15 mL) was added slowly at room temperature. The reaction mixture was monitored by TLC at room temperature. After completed, the white precipitate was filtered off and the solution was concentrated under vacuum. Corresponding redox active esters were purified by column chromatography on silica gel (petroleum ether/ethyl acetate as eluent).

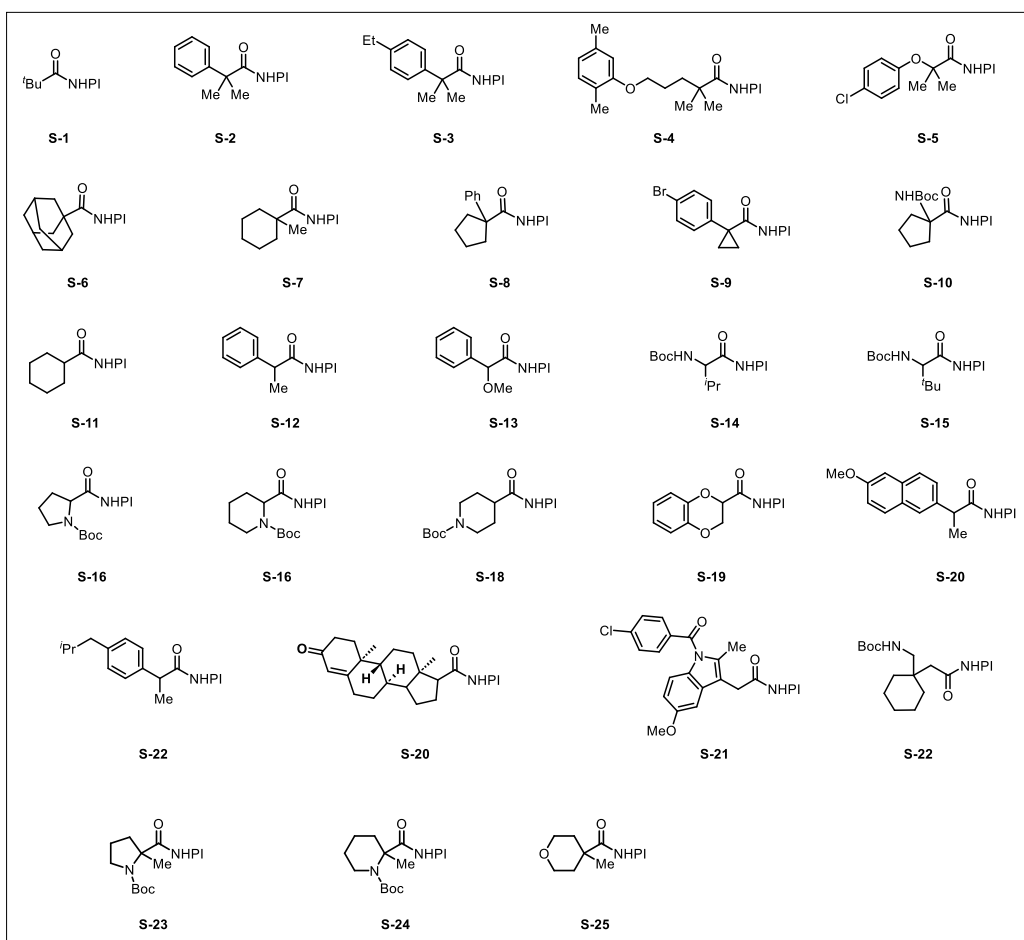

### 3.3 Synthesis of pyridinium salts.<sup>[3]</sup>

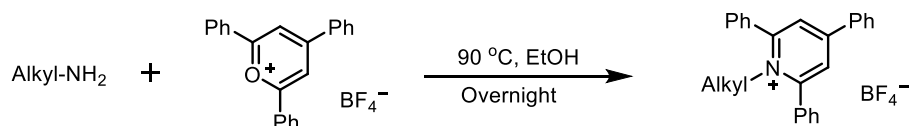

A magnetic stir bar, primary amine (1.2 equiv.) was added to a suspension of 2,4,6- triphenylpyrylium tetrafluoroborate (1.0 equiv.) and EtOH (1.0 M) in a round-bottom flask. The mixture was stirred and heated at reflux in an oil bath at 85 °C to 90 °C for 4 h. The mixture was then allowed to cool to room temperature. If product precipitation occurred after cooling to room temperature, the solid was filtered, washed with EtOH and then Et<sub>2</sub>O, and dried under high vacuum.

### 3.4 Synthesis of 1,4-dihydropyridines (DHP).<sup>[4]</sup>

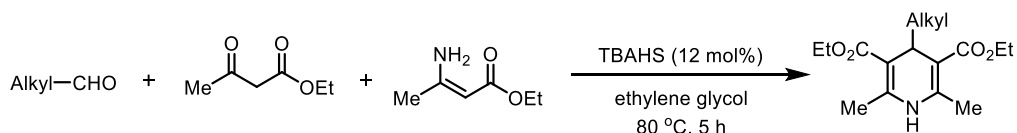

A magnetic stir bar, Bu<sub>4</sub>NHSO<sub>4</sub> (12 mol%) ethyl 3-aminocrotonate (1.0 equiv.), ethyl acetoacetate (1.0 equiv.), aldehyde (1.0 equiv.), and d ethylene glycol (2.5 M) were added into a round-bottom flask, which was closed with a rubber stopper with argon balloon and heated at 80 °C for overnight. After cooling to room temperature, the reaction mixture was diluted with water, extracted with ethyl acetate,

dried over Na<sub>2</sub>SO<sub>4</sub> and concentrated in vacuo. Purification of the crude product by flash chromatography on silica gel using the solvent system afforded the desired product.

#### 4. General procedure for the catalytic reactions

##### 4.1 Standard procedure for the synthesis of products

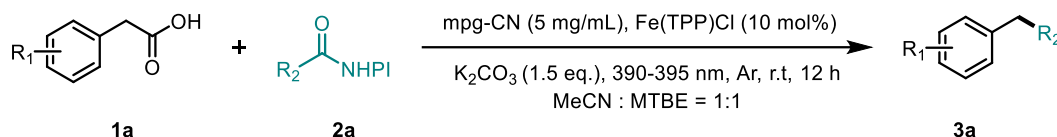

To an oven-dried 10 mL glass storage tube with a stir bar were added acid (1.0 equiv., 0.2 mmol), redox active ester (1.2 equiv., 0.24 mmol), mpg-CN (10 mg), Fe(TPP)Cl (10 mol%) and K<sub>2</sub>CO<sub>3</sub> (1.5 equiv., 0.3 mmol). The mixture was evacuated and backfilled with argon for 3 times before mixed solvent (MeCN : MTBE = 1 : 1) (2.0 mL) were added. The reaction mixture was placed in a photo reactor, and maintained at approximately room temperature. The mixture was then stirred rapidly and irradiated for 12-24 hours. mpg-CN was obtained by rapid filtration of the reaction mixture, and the filtrate was concentrated under vacuo. The product was purified via flash column chromatography on silica gel (petroleum ether/ethyl acetate = 200:1~50:1).

##### 4.2 Standard procedure for gram-scale synthesis

An oven-dried 100 mL flask equipped with a magnetic stir bar was sequentially charged with 2-([1,1'-biphenyl]-4-yl)acetic acid (1.0 equiv., 4.0 mmol), tertiary butyl redox active ester (1.2 equiv., 4.8 mmol), mpg-CN (200 mg) and Fe(TPP)Cl (10 mol%) and K<sub>2</sub>CO<sub>3</sub> (1.5 equiv., 0.3 mmol). The mixture was evacuated and backfilled with argon for 3 times before mixed solvent (MeCN : MTBE = 1: 1) (40.0 mL) were added. The reaction mixture was placed in a photo reactor, and maintained at approximately room temperature. The mixture was then stirred rapidly and irradiated for 12 hours. mpg-CN was obtained by rapid filtration of the reaction mixture, and the filtrate was concentrated under vacuo. The product was purified via flash column chromatography on silica gel (petroleum ether/ethyl acetate = 200:1~50:1).

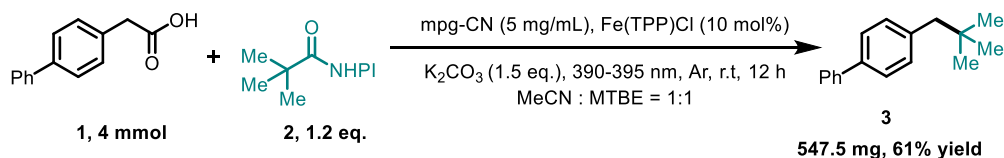

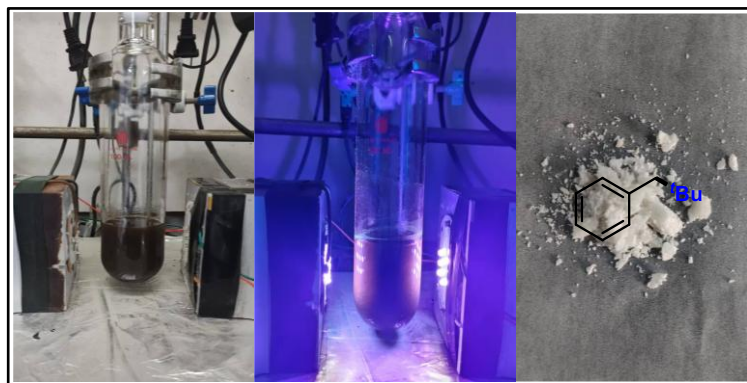

**Figure S10** gram-scale synthesis

## 5. Mechanism research

### 5.1 radical trapping experiment

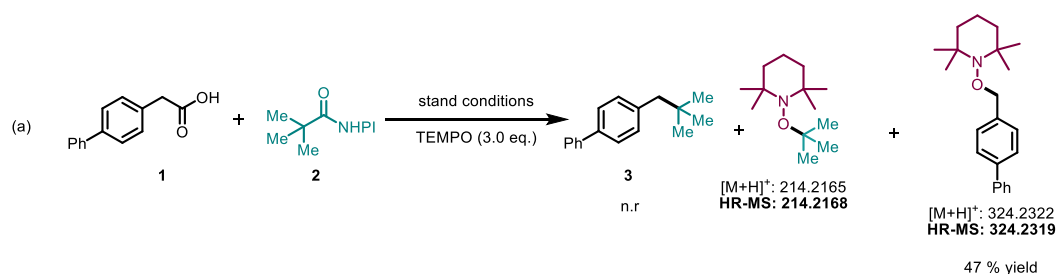

To an oven-dried 10 mL glass storage tube with a stir bar were added acid (1.0 equiv., 0.2 mmol), redox active ester (1.2 equiv., 0.24 mmol), mpg-CN (10 mg), Fe(TPP)Cl (10 mol%) and K<sub>2</sub>CO<sub>3</sub> (1.5 equiv., 0.3 mmol), TEMPO (3.0 eq., 0.6 mmol). The mixture was evacuated and backfilled with argon for 3 times before mixed solvent (MeCN : MTBE = 1 : 1) (2.0 mL) were added. The reaction mixture was placed in a photo reactor, and maintained at approximately room temperature. The mixture was then stirred rapidly and irradiated for 12 hours. mpg-CN was obtained by rapid filtration of the reaction mixture, and the filtrate was concentrated under vacuo. The product was purified via flash column chromatography on silica gel (petroleum ether/ethyl acetate = 100:1~50:1).

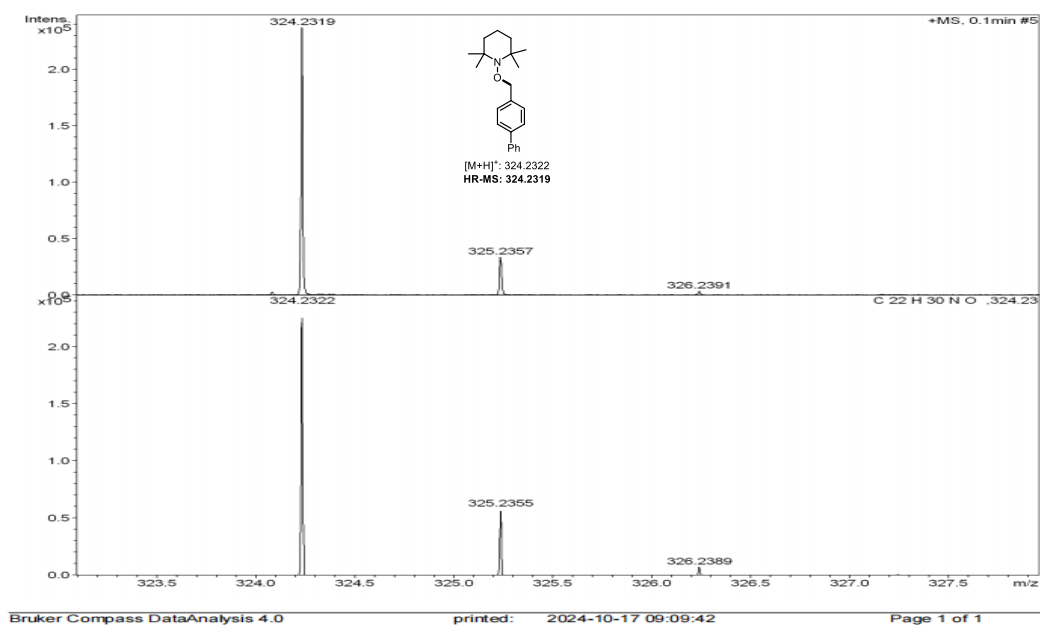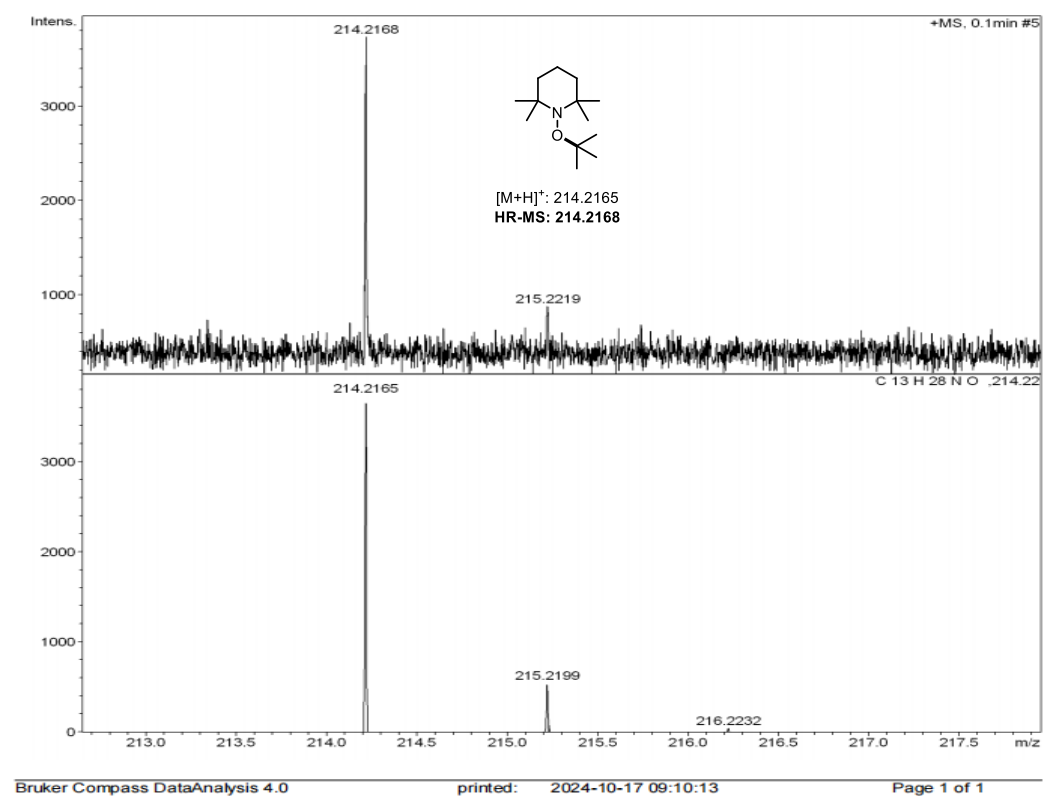

$^1H$  NMR (400 MHz,  $CDCl_3$ )  $\delta$  7.58 (t,  $J$  = 8.0 Hz, 4H), 7.43 (m, 4H), 7.34 (d,  $J$  = 7.3 Hz, 1H), 4.87 (s, 2H), 1.57 (m, 2H), 1.51 (d,  $J$  = 12.4 Hz, 4H), 1.28 (s, 6H), 1.17 (s, 6H).;  $^{13}C$  NMR (100 MHz,  $CDCl_3$ )  $\delta$  141.2, 140.5, 137.5, 128.9, 128.1, 127.3, 127.26, 127.19, 78.6, 60.2, 39.9, 33.3, 20.5, 17.3.

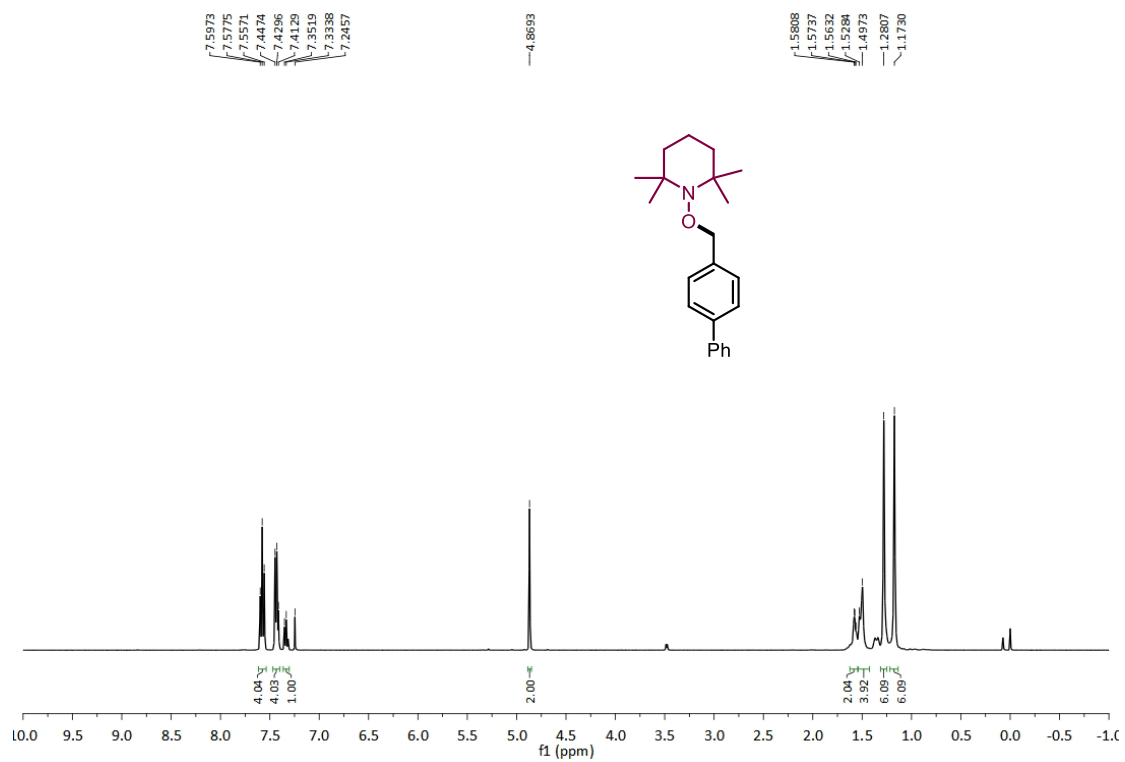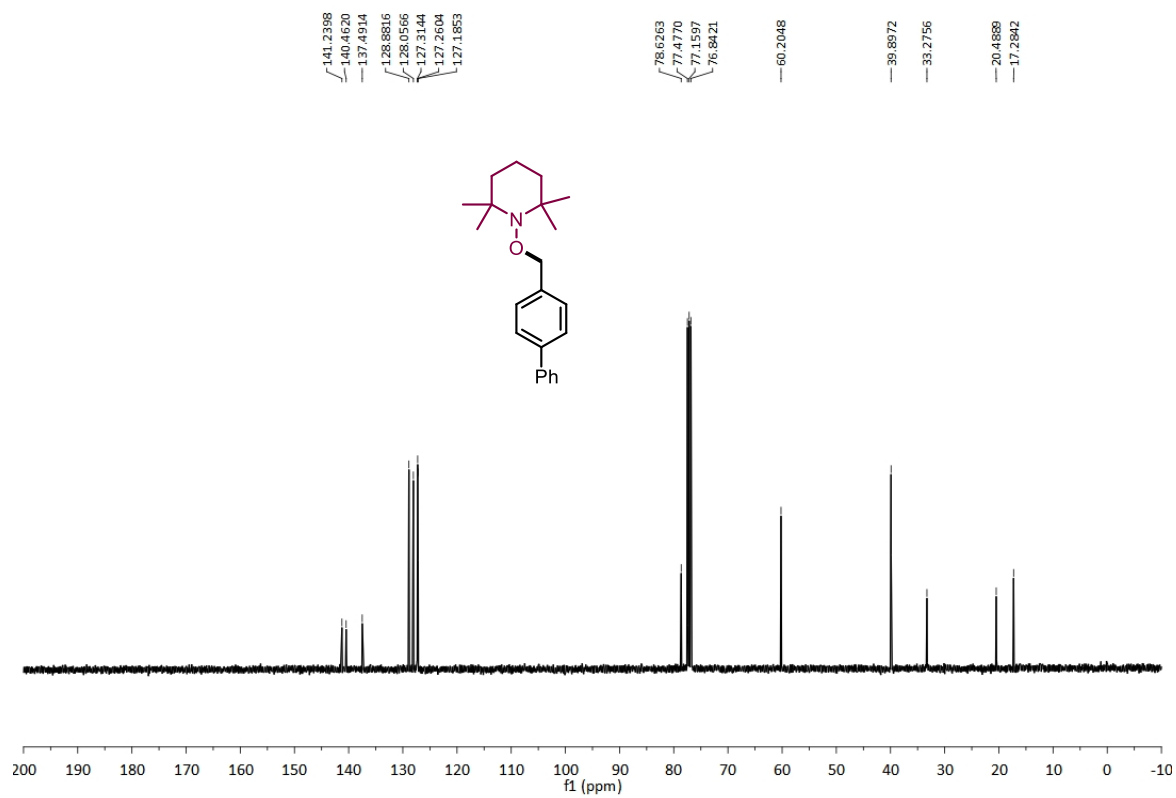

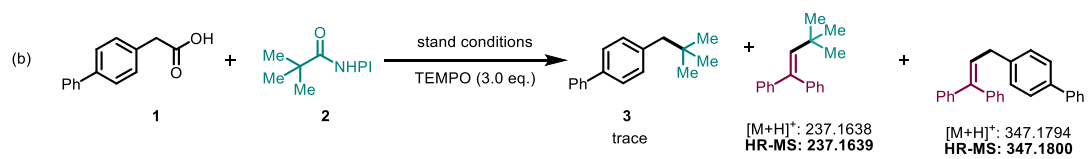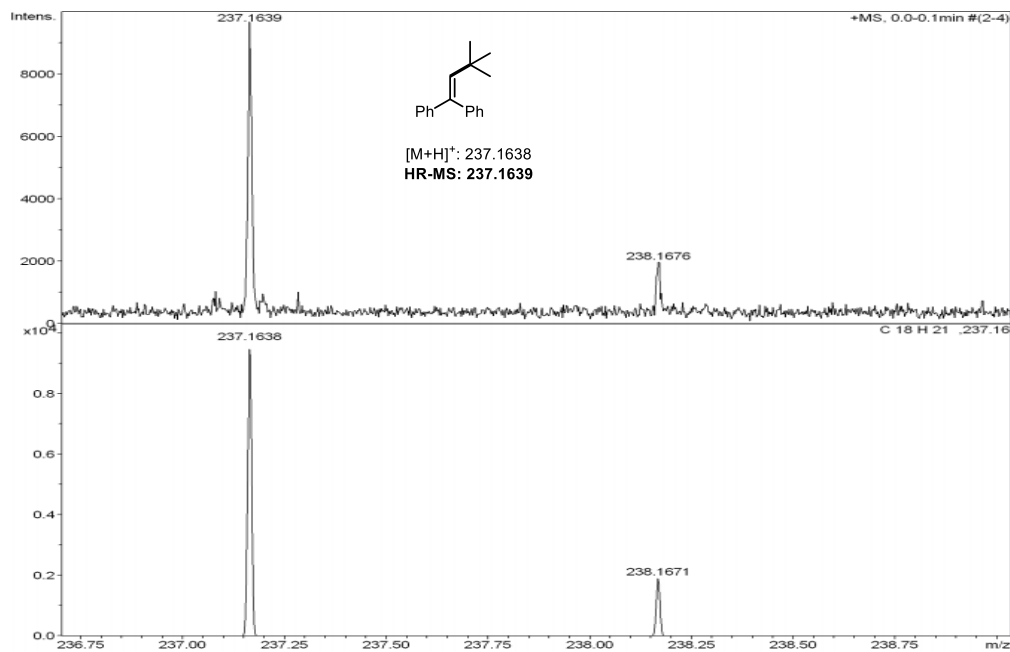

Bruker Compass DataAnalysis 4.0

printed: 2024-10-17 10:22:58

Page 1 of 1

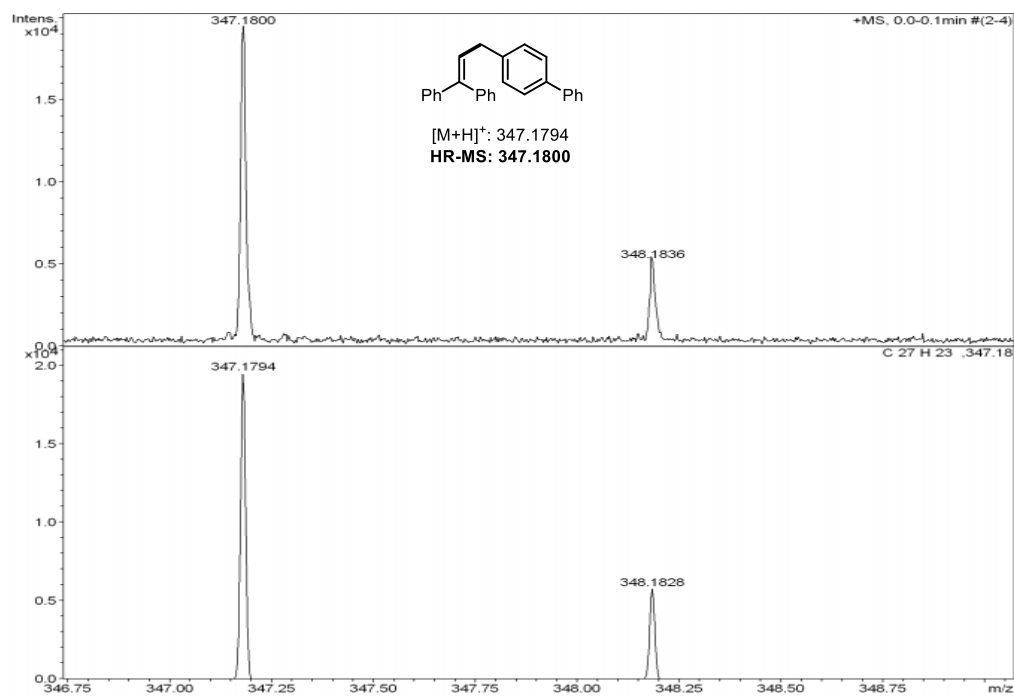

Bruker Compass DataAnalysis 4.0

printed: 2024-10-17 10:23:48

Page 1 of 1

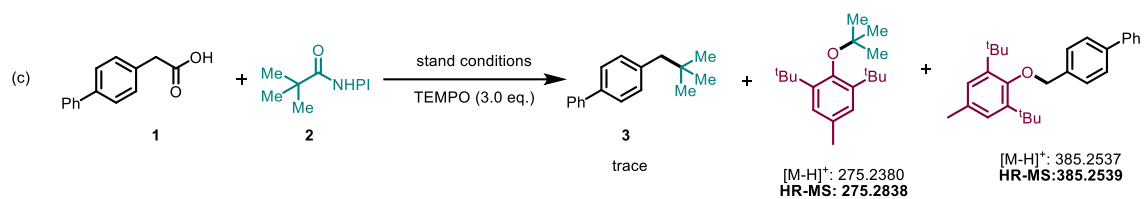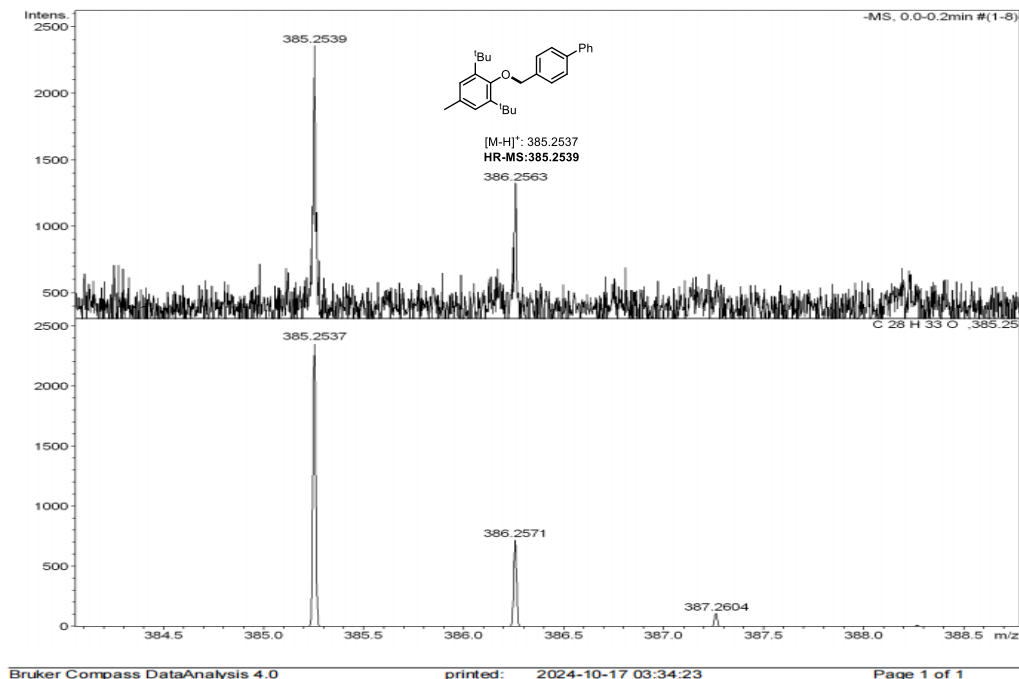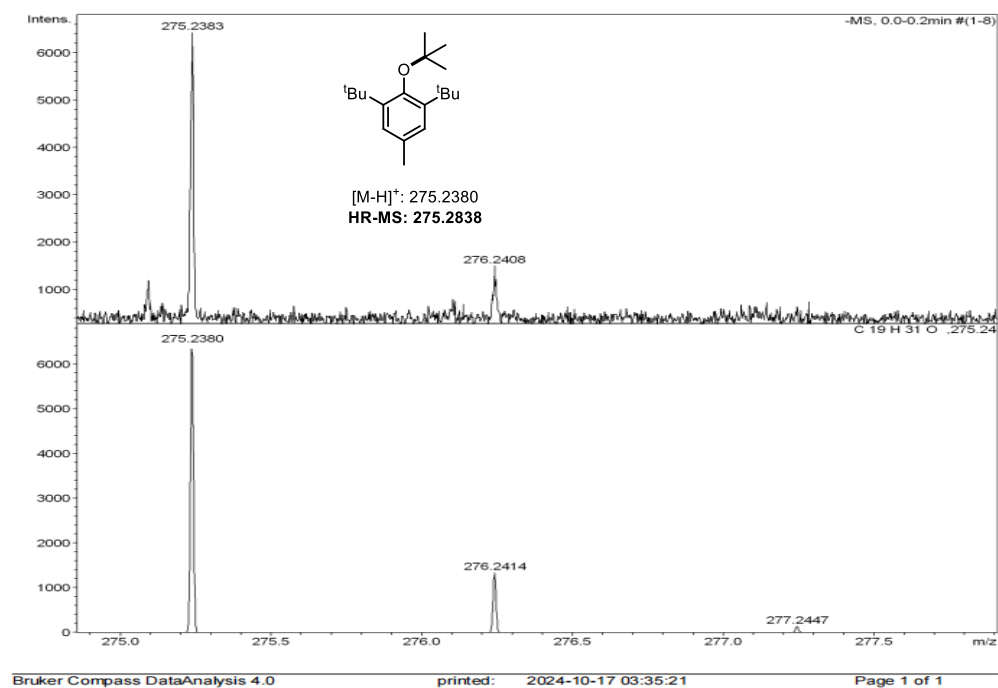

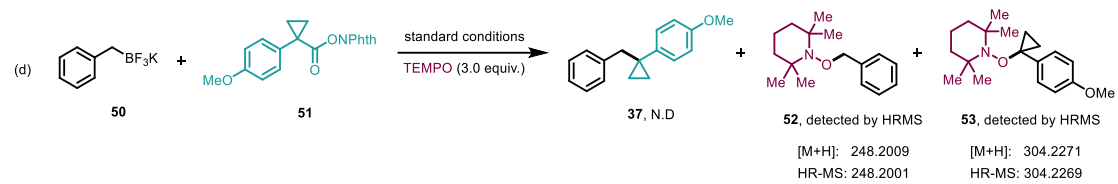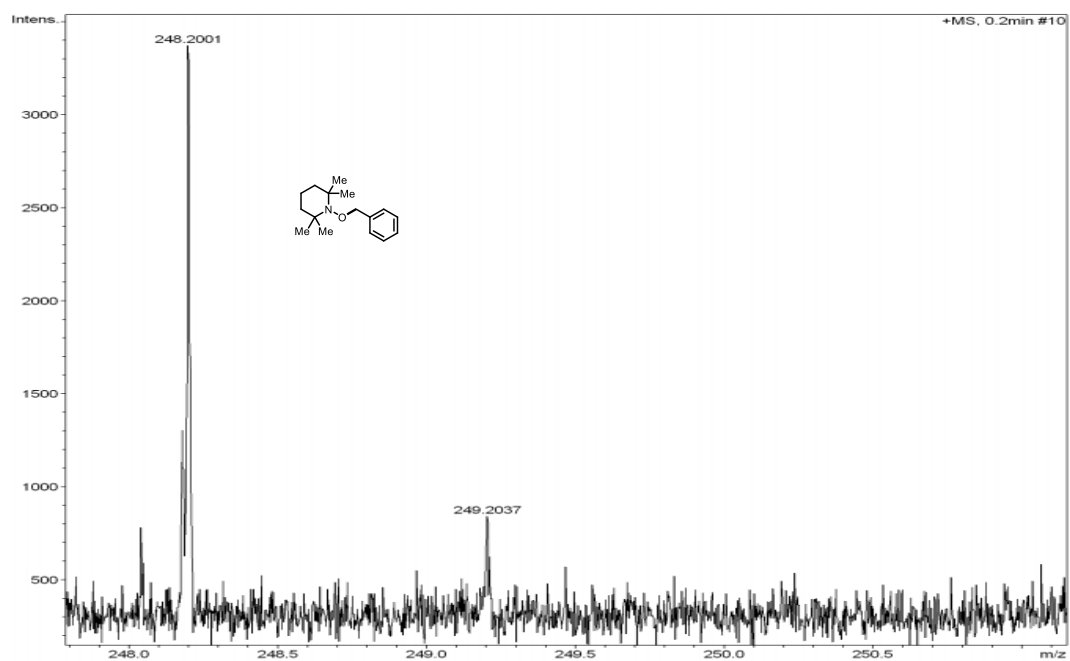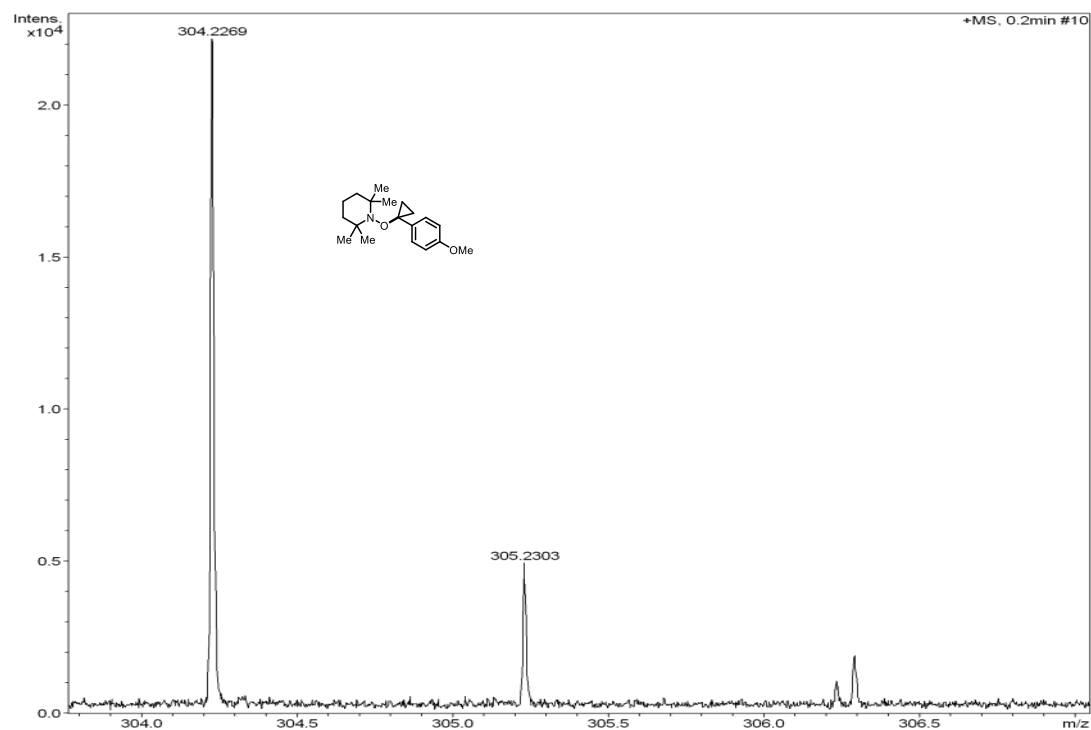

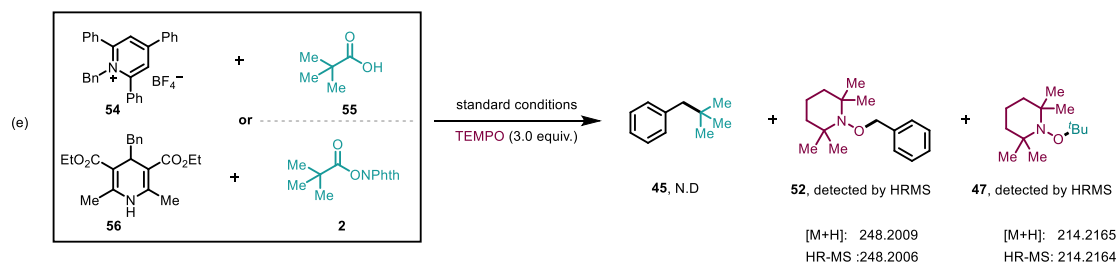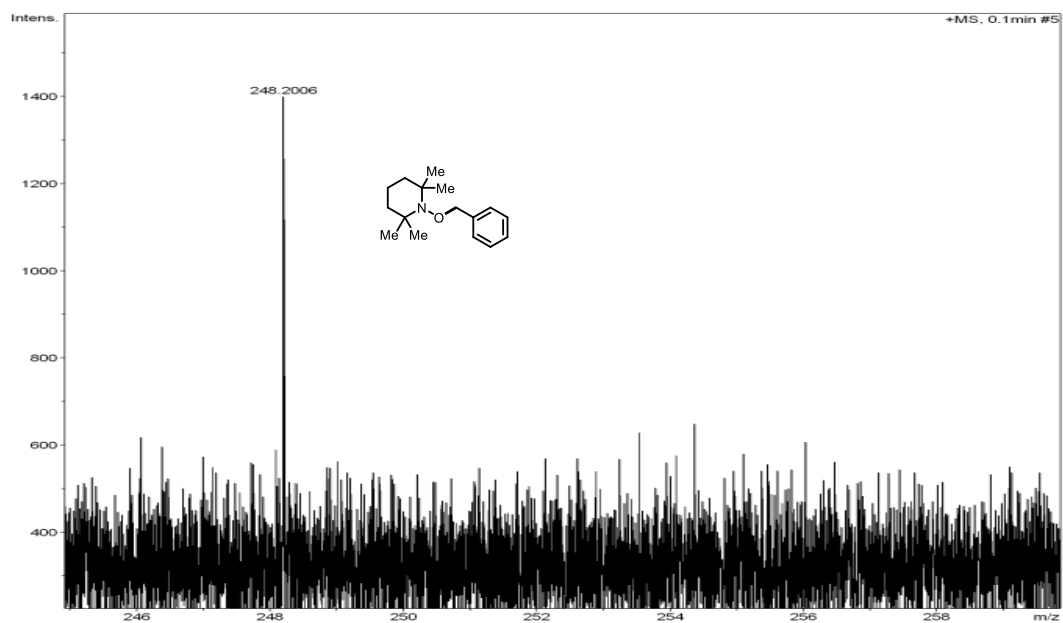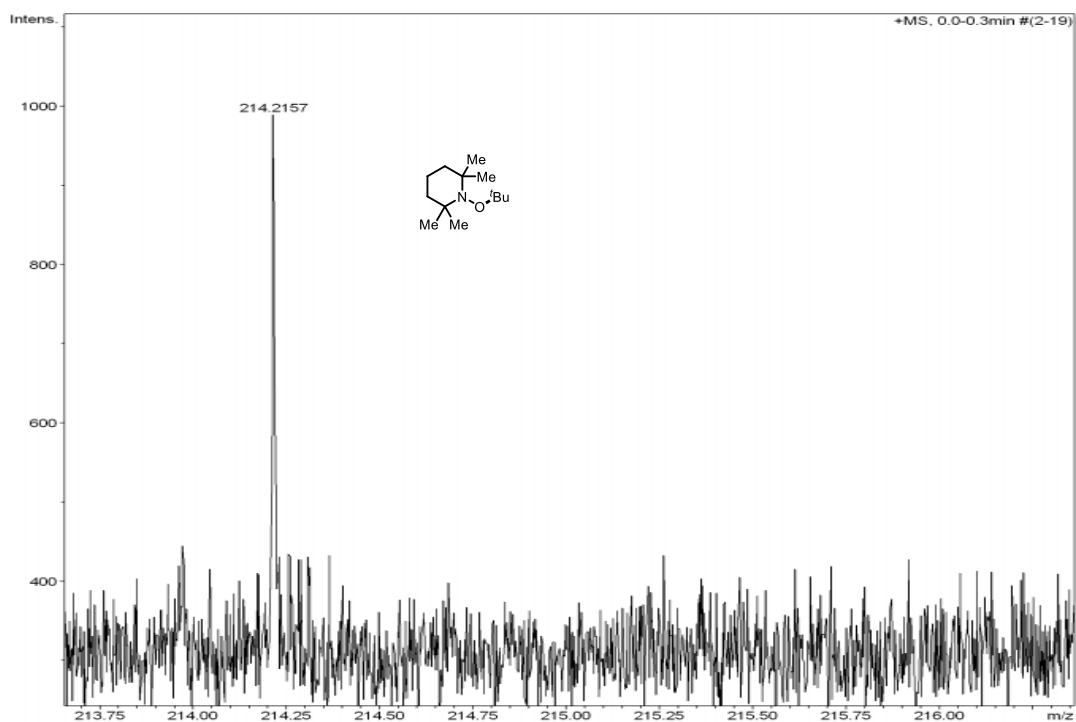

## 5.2 Radical Clock Experiments

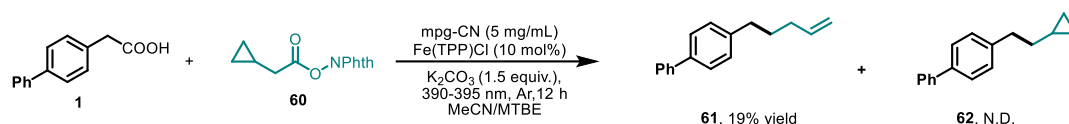

To an oven-dried 10 mL glass storage tube with a stir bar were added acid (1.0 equiv., 0.2 mmol), redox active ester (1.2 equiv., 0.24 mmol), mpg-CN (10 mg), Fe(TPP)Cl (10 mol%) and K<sub>2</sub>CO<sub>3</sub> (1.5 equiv., 0.3 mmol). The mixture was evacuated and backfilled with argon for 3 times before mixed solvent (MeCN : MTBE = 1 : 1) (2.0 mL) were added. The reaction mixture was placed in a photo reactor, and maintained at approximately room temperature. The mixture was then stirred rapidly and irradiated for 12 hours. mpg-CN was obtained by rapid filtration of the reaction mixture, and the filtrate was concentrated under vacuo. The product was purified via flash column chromatography on silica gel (petroleum ether/ethyl acetate = 250: 1~200:1).

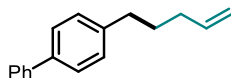

4-(pent-4-en-1-yl)-1,1'-biphenyl (**61**)<sup>[20]</sup>: The product **61** was purified by column chromatography (petroleum ether/ethyl acetate = 250:1~200:1). white solid, 19% yield.

<sup>1</sup>H NMR (400 MHz, CDCl<sub>3</sub>) δH 7.51 (d, *J* = 7.0 Hz, 2H), 7.44 (d, *J* = 8.2 Hz, 2H), 7.35 (t, *J* = 7.4 Hz, 2H), 7.25 (d, *J* = 7.4 Hz, 1H), 7.18 (t, *J* = 4.6 Hz, 2H), 5.83-5.73 (m, 1H), 5.0-4.9 (m, 2H), 2.60 (t, *J* = 7.8 Hz, 2H), 2.05 (q, *J* = 7.2 Hz, 2H), 1.73-1.65 (m, 2H).; <sup>13</sup>C NMR (100 MHz, CDCl<sub>3</sub>) δC 141.6, 141.1, 138.7, 138.6, 128.9, 128.7, 127.1, 127.0, 126.9, 114.8, 35.0, 33.3, 30.6.

## 5.3 Kinetic Studies

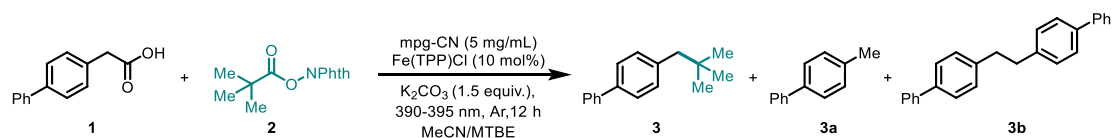

Kinetic profiles of substrate **1** at different initial concentrations (from 0.05 M to 0.15 M) are shown in figure S11, left. A linear relationship was observed between the observed rate constant *K*<sub>obs</sub> and the concentration of **1**, indicating a first-order kinetic dependence on **1**.

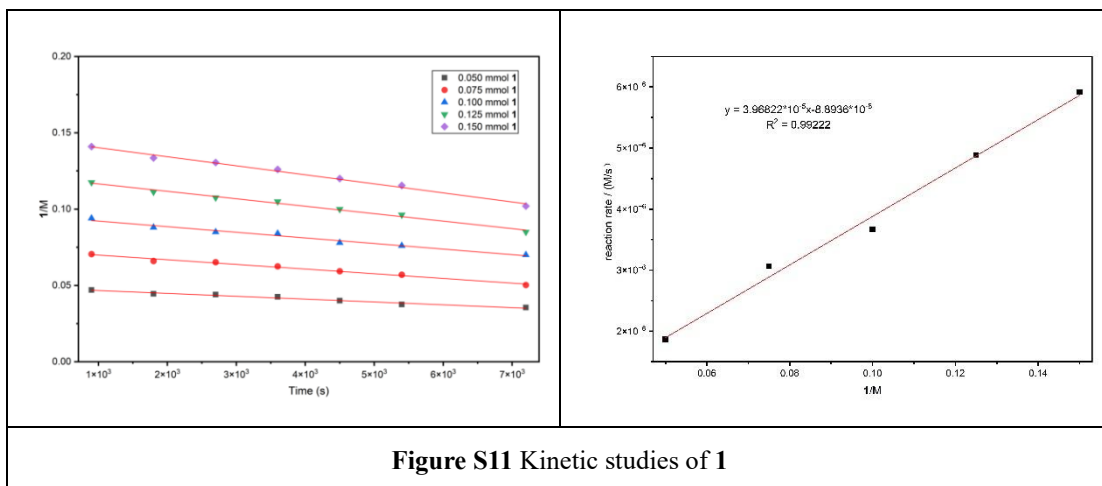

**Figure S11** Kinetic studies of **1**

Kinetic profiles of substrate **2** at different initial concentrations (from 0.080 M to 0.160 M) are shown in figure S12, left. A linear relationship was observed between the observed rate constant  $k_{obs}$  and the concentration of **2**, indicating a zero-order kinetic dependence on **2**.

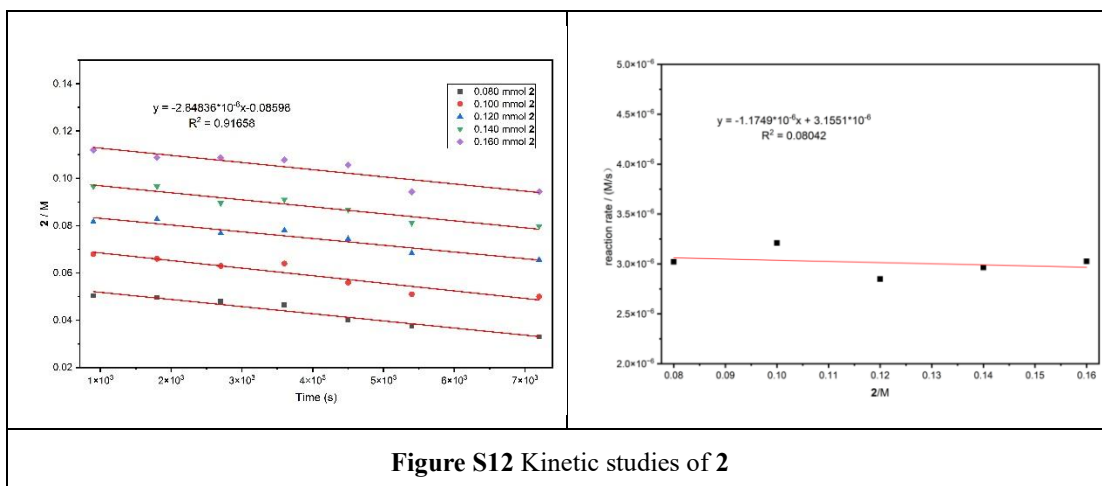

**Figure S12** Kinetic studies of **2**

#### 5.4 Cyclic Voltammograms Profiles.

Samples were prepared by mixing 0.002 mmol of the substrate in 20 mL of 0.1 M  $n\text{Bu}_4\text{NPF}_6$  in anhydrous DMF. Measurements employed a glassy carbon working electrode, platinum wire counter electrode, saturated calomel electrode (SCE) reference electrode, and a scan rate of 1000 mV/s. The solution was sparged with nitrogen for 5 minutes before data collection.  $E_{1/2}$  was obtained using Origin.

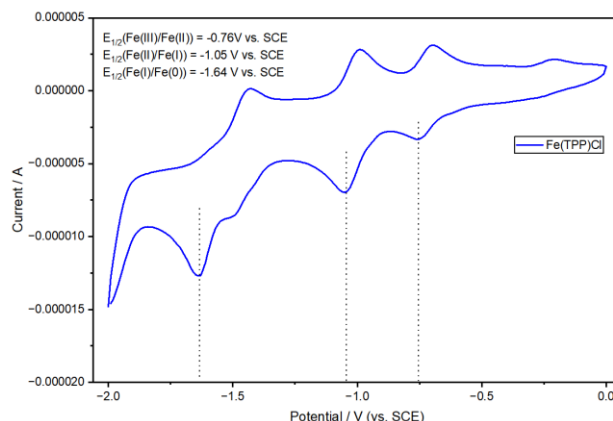

**Figure S13** CV data of Fe(TPP)Cl

### 5.5 Product distribution for a model primary/tertiary cross-carboxylic acid coupling reaction

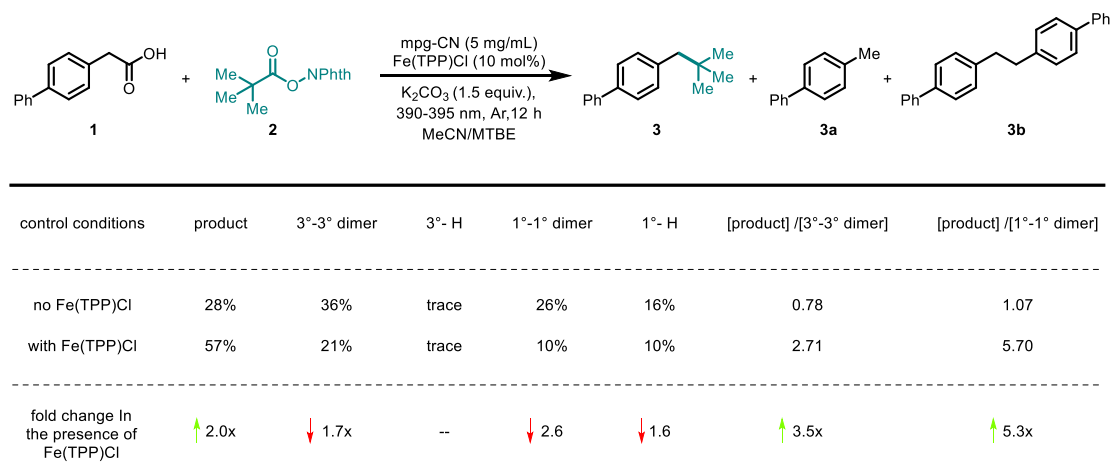

#### **Scheme S4** Product distribution for a model primary/tertiary cross-carboxylic acid coupling reaction

Data from the 1<sup>o</sup>–3<sup>o</sup> double decarboxylative acid coupling (Scheme S4) also support a meaningful radical sorting effect. The presence of the Fe(TPP)Cl catalyst enhanced the formation of cross-coupled product by 2.04-fold while decreasing the 1<sup>o</sup> homodimerization by 2.6-fold, resulting in a net 5.3-fold boost of selective formation of cross-coupled product over the 1<sup>o</sup> homodimerization. Although the degree of 3<sup>o</sup> homodimerization showed a very marginal increase (1.7-fold) in the presence of the Fe(TPP)Cl catalyst, the net selectivity of cross-coupled product formation over 3<sup>o</sup> homodimerization reflects a 3.5-fold enhancement. The sorting coefficients for stochastic 1<sup>o</sup> and 3<sup>o</sup> radical recombination in this reaction are 1.07 and 0.78, respectively, whereas adding a Fe(TPP)Cl catalyst increases the sorting coefficients to 5.7 and 2.7, respectively. The observed higher preference for decreased 1<sup>o</sup> homodimerization and hydrogenation side product in the presence of the Fe(TPP)Cl catalyst would imply a favorable binding of the less substituted 1<sup>o</sup> radical, consistent with the radical sorting effect. As such, the aforementioned

5.7-fold enhancement of 1° sorting coefficient would also reinforce a more favorable pathway between a more substituted 3° radical and an Fe-1° alkyl complex, thus further supporting that the iron-mediated radical sorting effect is operative in these decarboxylative cross-coupling reactions.

### 5.6 Comparison of our catalytic system with Macmillan's S<sub>H</sub>2 system

|                                               | Our work                                                                                                                                                                                                                                                                                    | MacMillan's S <sub>H</sub> 2 system                                                                                                                                                                                                                                     |
|-----------------------------------------------|---------------------------------------------------------------------------------------------------------------------------------------------------------------------------------------------------------------------------------------------------------------------------------------------|-------------------------------------------------------------------------------------------------------------------------------------------------------------------------------------------------------------------------------------------------------------------------|
| Catalytic system                              | Semi-heterogeneous Dual Catalysis: mpg-CN/Fe(TPP)Cl                                                                                                                                                                                                                                         | Homogeneous Dual Catalysis TXO or 4CzIPN with Ni(acac) <sub>2</sub> /K[Tp*]                                                                                                                                                                                             |
| Metal center and ligand property              | Fe(TPP)Cl: The porphyrin ligand provides a stable coordination environment and features a relatively weak metal–carbon bond, which facilitates S <sub>H</sub> 2 substitution. This system selectively captures less hindered alkyl radicals and does not form tertiary alkyl–iron complexes | Ni(acac) <sub>2</sub> /K[Tp*]: The scorpionate ligand modulates the coordination selectivity of the Ni center, stabilizing binding exclusively with methyl or primary alkyl radicals, while secondary or tertiary radicals remain free and participate in the reaction. |
| Radical cross-coupling types                  | 3°-1°, 2°-1°, 1°-1°                                                                                                                                                                                                                                                                         | 3°-1°, 2°-1°, 1°-1°                                                                                                                                                                                                                                                     |
| Radical precursors                            | Carboxylic acids, redox-active esters, potassium trifluoroborates, Katritzky salts, DHPs<br>No requirement of external activating agent                                                                                                                                                     | Limited to carboxylic acid<br><br>Requiring excess amount of MesI(OAc) <sub>2</sub> as activating reagents                                                                                                                                                              |
| Reaction conditions and application potential | Semi-heterogeneous system: mpg-CN (recycle for 5 times)<br>gram-scale synthesis<br>broad functional group tolerance<br>mild reaction conditions (390-395 nm)                                                                                                                                | Homogeneous system:<br>no data for recyclability of TXO or 4CzIPN<br>no gram-scale synthesis<br>broad scope<br>UV or visible light                                                                                                                                      |

### 5.7 Stern-Volmer experiments.

The Stern-Volmer measurements were conducted in a 2 mL suspension of mpg-CN in acetonitrile (0.25 mg mL<sup>-1</sup>). The measurements were carried out in a 1 cm pathlength quartz cuvette, with continuous stirring of the suspension to ensure homogeneity. The sample was excited using a 375 nm continuous-wave (CW) laser operating at a power of 550 μW. The emitted light was filtered through a dichroic mirror

to eliminate scattered laser light before being collected by a Fluorescence spectra were acquired/recorded using a Hitachi F-7000 fluorescence spectrophotometer. The excitation wavelength of 375 nm was specifically chosen to avoid overlap or interference with the mpg-CN emission spectra. For each experiment, a 1000  $\mu\text{M}$  stock solution of the molecule to analyze was prepared in a 1:1 mixture of water and acetonitrile. Incremental additions of 20  $\mu\text{L}$  of this stock solution were made every 5 minutes to the cuvette containing the mpg-CN suspension, resulting in a stepwise concentration increase of 10  $\mu\text{M}$  per addition.

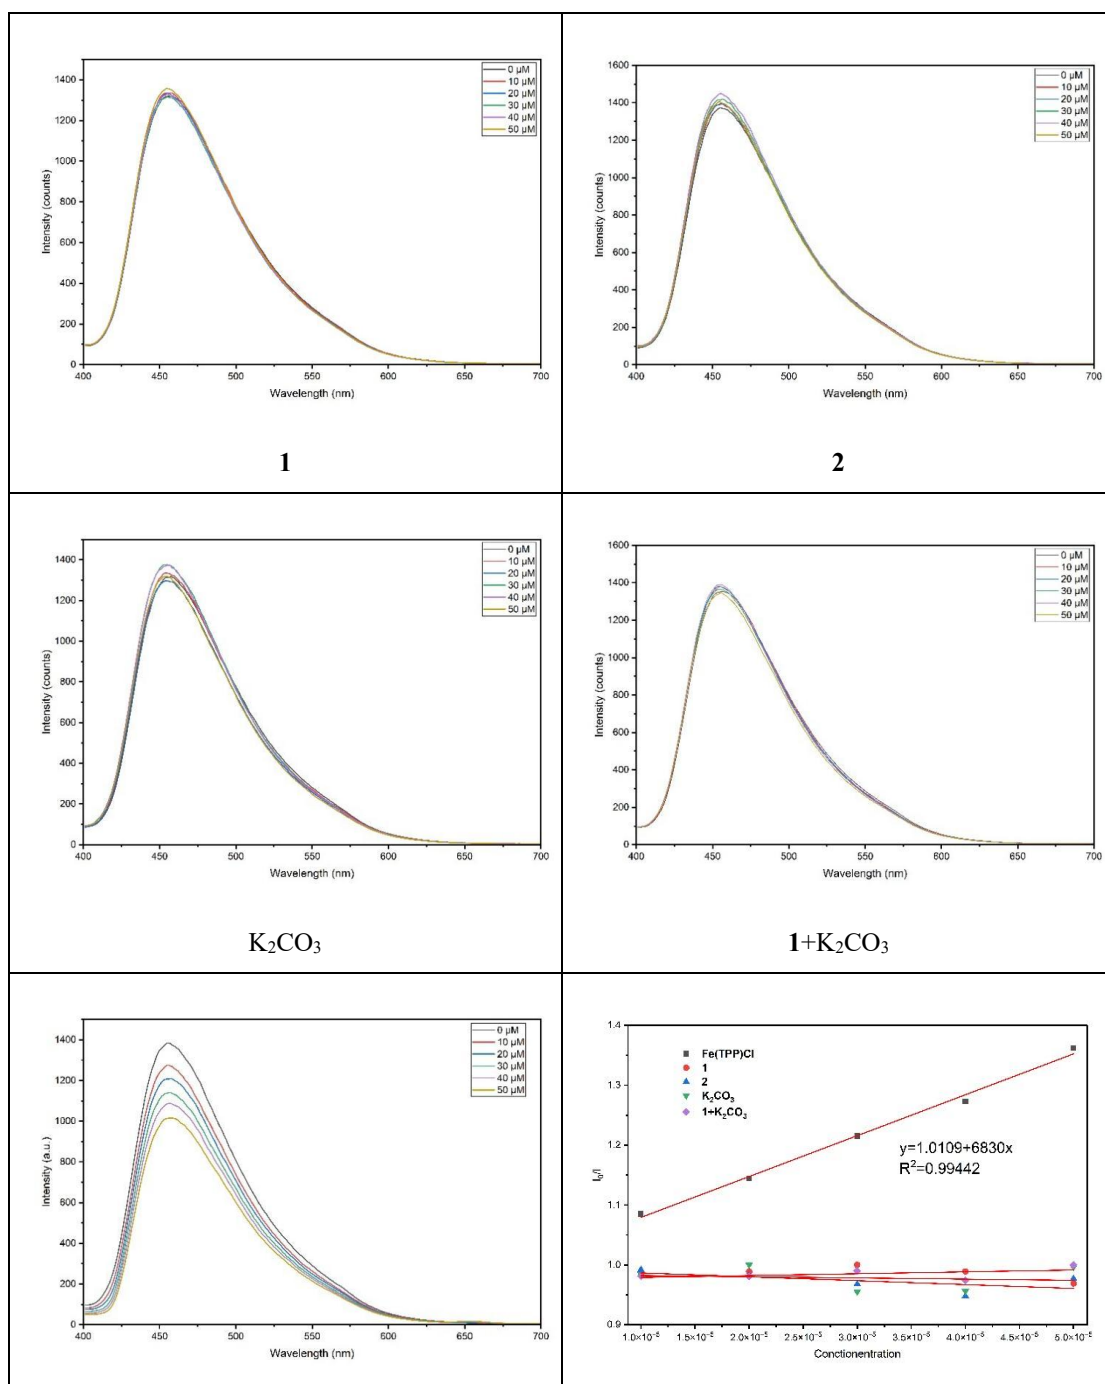

|           |                                      |
|-----------|--------------------------------------|
| Fe(TPP)Cl | Quenching plots of different species |
|-----------|--------------------------------------|

**Figure S14** Stern-Volmer quenching experiments and quenching plots of different species

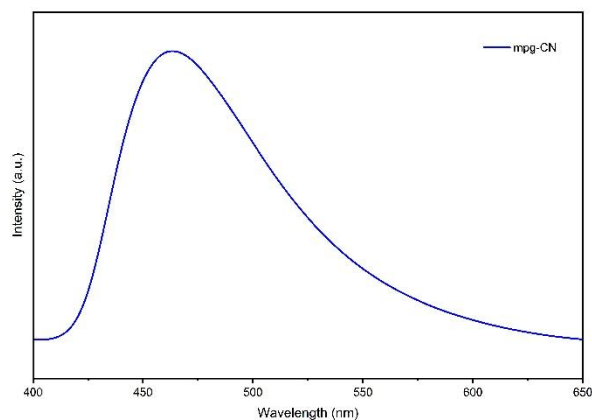

**Figure S15** The photoluminescence (PL) spectra of mpg-CN.

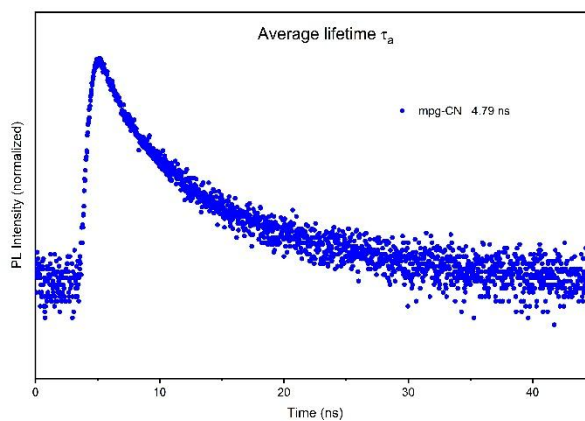

**Figure S16** Time-resolved photoluminescence (TRPL) spectra of different mpg-CN.

$$\tau_{av} = \frac{A_1 \tau_1^2 + A_2 \tau_2^2}{A_1 \tau_1 + A_2 \tau_2}$$

Time-resolved photoluminescence (TRPL) spectra monitored at the corresponding emission peaks give the average radiative lifetimes ( $\tau$ ) of the recombining charge carriers. The radiative lifetimes of mpg-CN were 4.79 ns, respectively (**Figure S16**), suggesting a reduced recombination rate of photogenerated electron-hole pairs. This extended lifetime implies that photogenerated electrons are more effectively sustained during the reaction, thereby enhancing the overall photocatalytic efficiency.

## 5.8 Characterization of compounds

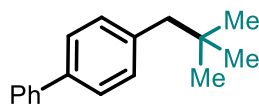

4-neopentyl-1,1'-biphenyl (**3**)<sup>[5]</sup>: The product **3** was purified by column chromatography (petroleum ether/ethyl acetate = 200:1~100:1). white solid, 70% yield.

<sup>1</sup>H NMR (400 MHz, CDCl<sub>3</sub>) δH 7.62 (d, *J* = 7.3 Hz, 2H), 7.52 (d, *J* = 8.1 Hz, 2H), 7.44 (t, *J* = 7.6 Hz, 2H), 7.35 (d, *J* = 7.4 Hz, 1H), 7.22 (d, *J* = 8.1 Hz, 2H), 2.56 (s, 2H), 0.96 (s, 9H).; <sup>13</sup>C NMR (100 MHz, CDCl<sub>3</sub>) δC 141.3, 139.1, 138.7, 131.0, 128.8, 127.12, 127.11, 126.5, 50.0, 32.0, 29.6.

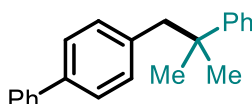

4-(2-methyl-2-phenylpropyl)-1,1'-biphenyl (**4**)<sup>[6]</sup>: The product **4** was purified by column chromatography (petroleum ether/ethyl acetate = 200:1~100:1). white solid, 62% yield.

<sup>1</sup>H NMR (400 MHz, CDCl<sub>3</sub>) δH 7.47 (dd, *J* = 5.2, 3.4 Hz, 2H), 7.35-7.27 (m, 4H), 7.27- 7.18 (m, 5H), 7.15-7.09 (m, 1H), 6.80 (d, *J* = 8.1 Hz, 2H), 2.83 (s, 2H), 1.27 (s, 6H).; <sup>13</sup>C NMR (100 MHz, CDCl<sub>3</sub>) δC 149.1, 141.2, 138.8, 138.2, 130.9, 128.8, 128.1, 127.1, 127.0, 126.4, 126.3, 125.8, 50.9, 39.0, 28.4.; HRMS (APCI-TOF) *m/z*: [M + H]<sup>+</sup> Calcd for C<sub>22</sub>H<sub>23</sub> 287.1794; Found 287.1796.

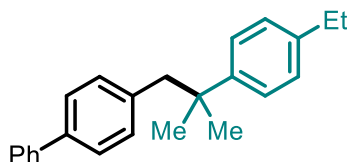

4-(2-(4-ethylphenyl)-2-methylpropyl)-1,1'-biphenyl (**5**)<sup>[7]</sup>: The product **5** was purified by column chromatography (petroleum ether/ethyl acetate = 200:1~100:1). white solid, 47% yield.

<sup>1</sup>H NMR (400 MHz, CDCl<sub>3</sub>) δH 7.48 (d, *J* = 7.8 Hz, 2H), 7.32 (t, *J* = 8.6 Hz, 4H), 7.23 (d, *J* = 7.4 Hz, 1H), 7.16 (t, *J* = 5.5 Hz, 2H), 7.06 (d, *J* = 8.1 Hz, 2H), 6.82 (d, *J* = 8.0 Hz, 2H), 2.81 (s, 2H), 2.57 (q, *J* = 7.6 Hz, 2H), 1.25 (s, 6H), 1.17 (t, *J* = 7.6 Hz, 3H).; <sup>13</sup>C NMR (100 MHz, CDCl<sub>3</sub>) δC 146.5, 141.6, 141.2, 138.8, 138.3, 131.0, 128.8, 127.5, 127.09, 127.06, 126.3, 126.2, 50.9, 38.7, 28.4, 28.39, 15.7. HRMS (APCI-TOF) *m/z*: [M + H]<sup>+</sup> Calcd for C<sub>24</sub>H<sub>27</sub> 315.2107; Found 315.2100.

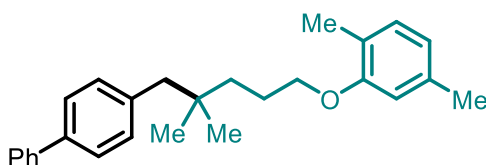

4-(5-(2,5-dimethylphenoxy)-2,2-dimethylpentyl)-1,1'-biphenyl (**6**): The product **6** was purified by column chromatography (petroleum ether/ethyl acetate = 150:1~100:1). white solid, 43% yield.

$^1\text{H}$  NMR (400 MHz,  $\text{CDCl}_3$ )  $\delta$  7.51 (d,  $J = 7.3$  Hz, 2H), 7.41 (d,  $J = 8.1$  Hz, 2H), 7.34 (t,  $J = 7.7$  Hz, 2H), 7.23 (t,  $J = 7.4$  Hz, 1H), 7.12 (m, 2H), 6.93 (d,  $J = 7.4$  Hz, 1H), 6.57 (m, 2H), 3.85 (t,  $J = 6.5$  Hz, 2H), 2.50 (s, 2H), 2.23 (s, 3H), 2.11 (s, 3H), 1.78 (m, 2H), 1.33 (m, 2H), 0.86 (s, 6H).;  $^{13}\text{C}$  NMR (100 MHz,  $\text{CDCl}_3$ )  $\delta$  157.2, 141.2, 138.8, 138.6, 136.5, 131.1, 130.4, 128.8, 127.12, 127.10, 126.5, 123.8, 120.8, 112.1, 68.7, 48.1, 38.2, 34.3, 27.1, 24.6, 21.6, 16.0. HRMS (APCI-TOF)  $m/z$ :  $[\text{M} + \text{H}]^+$  Calcd for  $\text{C}_{27}\text{H}_{33}\text{O}$  373.2526; Found 373.2526.

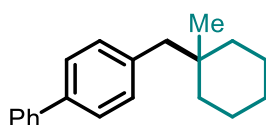

4-((1-methylcyclohexyl)methyl)-1,1'-biphenyl (**7**): The product **7** was purified by column chromatography (petroleum ether/ethyl acetate = 250:1~100:1). white solid, 70% yield.

$^1\text{H}$  NMR (400 MHz,  $\text{CDCl}_3$ )  $\delta$  7.51 (m, 2H), 7.41 (d,  $J = 8.1$  Hz, 2H), 7.34 (t,  $J = 7.6$  Hz, 2H), 7.24 (d,  $J = 7.3$  Hz, 1H), 7.11 (d,  $J = 8.1$  Hz, 2H), 2.49 (s, 2H), 1.50-1.36 (m, 5H), 1.26-1.18 (m, 5H), 0.79 (s, 3H).;  $^{13}\text{C}$  NMR (100 MHz,  $\text{CDCl}_3$ )  $\delta$  141.2, 139.6, 138.4, 131.1, 129.5, 128.7, 127.0, 126.3, 48.5, 37.2, 34.2, 26.5, 24.7, 22.2. HRMS (APCI-TOF)  $m/z$ :  $[\text{M} + \text{H}]^+$  Calcd for  $\text{C}_{20}\text{H}_{25}$  265.1951; Found 265.1946.

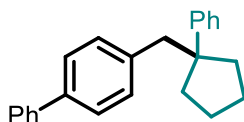

4-((1-phenylcyclopentyl)methyl)-1,1'-biphenyl (**8**): The product **8** was purified by column chromatography (petroleum ether/ethyl acetate = 200:1~100:1). light yellow solid, 63% yield.

$^1\text{H}$  NMR (400 MHz,  $\text{CDCl}_3$ )  $\delta$  7.46 (dd,  $J = 5.2, 3.3$  Hz, 2H), 7.31 (dd,  $J = 10.4, 4.8$  Hz, 2H), 7.19 (m, 5H), 7.10-7.09 (m, 1H), 7.02-7.00 (m, 2H), 6.57 (d,  $J = 8.1$  Hz, 2H), 2.79 (s, 2H), 1.79 (m, 8H).;  $^{13}\text{C}$  NMR (100 MHz,  $\text{CDCl}_3$ )  $\delta$  148.3, 141.2, 138.6, 138.3, 130.7, 128.8, 127.8, 127.6, 127.1, 127.0, 126.1, 125.7, 52.6, 47.3, 36.9, 23.1.

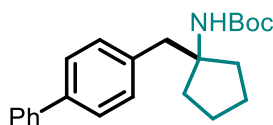

tert-butyl (1-([1,1'-biphenyl]-4-ylmethyl)cyclopentyl)carbamate (**9**): The product **9** was purified by

column chromatography (petroleum ether/ethyl acetate = 100:1~20:1). white solid, 47% yield.

$^1\text{H}$  NMR (400 MHz,  $\text{CDCl}_3$ )  $\delta$  7.51 (d,  $J = 7.5$  Hz, 2H), 7.43 (d,  $J = 8.0$  Hz, 2H), 7.35 (t,  $J = 7.6$  Hz, 2H), 7.26 (d,  $J = 7.3$  Hz, 1H), 7.15 (d,  $J = 8.0$  Hz, 2H), 4.19 (s, 1H), 3.02 (s, 2H), 1.76 (s, 2H), 1.64 (s, 6H), 1.41 (s, 9H).;  $^{13}\text{C}$  NMR (100 MHz,  $\text{CDCl}_3$ )  $\delta$  155.0, 141.2, 139.1, 138.3, 130.8, 128.9, 127.2, 127.1, 126.8, 78.9, 64.3, 42.0, 38.0, 29.8, 23.2. HRMS (APCI-TOF)  $m/z$ :  $[\text{M} + \text{H}]^+$  Calcd for  $\text{C}_{23}\text{H}_{30}\text{NO}_2$  352.2271; Found 352.2265.

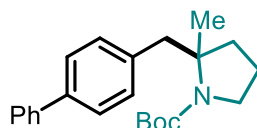

tert-butyl 2-([1,1'-biphenyl]-4-ylmethyl)-2-methylpyrrolidine-1-carboxylate (**10**): The product **10** was purified by column chromatography (petroleum ether/ethyl acetate = 80:1~20:1). colorless oily liquid, 45% yield.

**The major rotamer:**  $^1\text{H}$  NMR (400 MHz,  $\text{CDCl}_3$ )  $\delta$  7.60 (dd,  $J = 7.8, 2.4$  Hz, 2H), 7.43 (dd,  $J = 7.8, 2.2$  Hz, 2H), 7.43 (t,  $J = 6.6$  Hz, 2H), 7.33 (dd,  $J = 8.5, 2.4$  Hz, 1H), 7.25-7.20 (dd,  $J = 10.6, 7.6$  Hz, 2H), 3.53-3.28 (m, 2H), 3.32-3.01 (m, 1H), 2.84-2.79 (m, 1H), 2.07-2.02 (m, 1H), 1.64-1.44 (m, 14H), 1.29-1.24 (m, 1H).;  $^{13}\text{C}$  NMR (100 MHz,  $\text{CDCl}_3$ )  $\delta$  154.4, 141.0, 139.1, 138.1, 130.9, 128.8, 127.1, 126.9, 126.8, 79.6, 63.6, 48.6, 44.0, 39.1, 28.8, 27.1, 21.7.; **The minor rotamer:**  $^1\text{H}$  NMR (400 MHz,  $\text{CDCl}_3$ )  $\delta$  7.60 (dd,  $J = 7.8, 2.4$  Hz, 2H), 7.43 (dd,  $J = 7.8, 2.2$  Hz, 2H), 7.43 (t,  $J = 6.6$  Hz, 2H), 7.33 (dd,  $J = 8.5, 2.4$  Hz, 1H), 7.25-7.20 (dd,  $J = 10.6, 7.6$  Hz, 2H), 3.53-3.28 (m, 2H), 3.32-3.01 (m, 1H), 2.84-2.79 (m, 1H), 2.07-2.02 (m, 1H), 1.64-1.44 (m, 14H), 1.29-1.24 (m, 1H).;  $^{13}\text{C}$  NMR (100 MHz,  $\text{CDCl}_3$ )  $\delta$  153.7, 140.9, 138.8, 137.8, 130.7, 128.7, 127.0, 126.9, 126.5, 78.6, 63.1, 48.5, 42.8, 37.8, 28.7, 26.0, 21.3.; HRMS (APCI-TOF)  $m/z$ :  $[\text{M} + \text{H}]^+$  Calcd for  $\text{C}_{23}\text{H}_{30}\text{NO}_2$  352.2271; Found 352.2272.

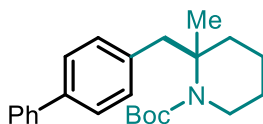

tert-butyl 2-([1,1'-biphenyl]-4-ylmethyl)-2-methylpiperidine-1-carboxylate (**11**): The product **11** was purified by column chromatography (petroleum ether/ethyl acetate = 50:1~20:1). light yellow solid, 51% yield.

$^1\text{H}$  NMR (400 MHz,  $\text{CDCl}_3$ )  $\delta$  7.59 (d,  $J = 7.0$  Hz, 2H), 7.50 (d,  $J = 8.0$  Hz, 2H), 7.43 (t,  $J = 7.6$  Hz,

2H), 7.33 (t,  $J = 7.3$  Hz, 1H), 7.24 (d,  $J = 8.0$  Hz, 2H), 3.82-3.76 (m, 1H), 3.33 (d,  $J = 13.2$  Hz, 1H), 2.92 (d,  $J = 13.2$  Hz, 1H), 2.87-2.79 (m, 1H), 1.82-1.75 (m, 1H). 1.67-1.56 (m, 3H), 1.51 (s, 3H), 1.49 (s, 9H), 1.33-1.29 (m, 2H).;  $^{13}\text{C}$  NMR (100 MHz,  $\text{CDCl}_3$ )  $\delta\text{C}$  156.0, 141.0, 138.9, 137.6, 131.0, 128.7, 127.1, 127.0, 126.6, 79.4, 57.9, 42.6, 41.1, 34.6, 28.7, 26.7, 22.9, 17.4. HRMS (APCI-TOF)  $m/z$ :  $[\text{M} + \text{H}]^+$  Calcd for  $\text{C}_{24}\text{H}_{32}\text{NO}_2$  366.2428; Found 366.2427.

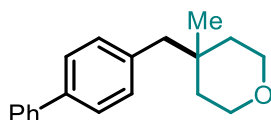

4-([1,1'-biphenyl]-4-ylmethyl)-4-methyltetrahydro-2H-pyran (**12**): The product **12** was purified by column chromatography (petroleum ether/ethyl acetate = 60:1~20:1). white solid, 65% yield.

$^1\text{H}$  NMR (400 MHz,  $\text{CDCl}_3$ )  $\delta\text{H}$  7.50 (d,  $J = 7.6$  Hz, 2H), 7.42 (d,  $J = 8.2$  Hz, 2H), 7.35 (t,  $J = 7.8$  Hz, 2H), 7.24 (t,  $J = 77.4$  Hz, 1H), 7.11 (d,  $J = 8.0$  Hz, 2H), 3.74-3.69 (m, 2H), 3.58-3.52 (m, 2H), 2.55 (s, 2H), 1.57-1.51 (m, 2H), 1.27-1.21 (m, 2H), 0.91 (s, 3H).;  $^{13}\text{C}$  NMR (100 MHz,  $\text{CDCl}_3$ )  $\delta\text{C}$  141.0, 139.0, 137.1, 131.1, 128.8, 127.1, 127.0, 126.5, 64.0, 48.8, 37.5, 32.1, 23.4.; HRMS (APCI-TOF)  $m/z$ :  $[\text{M} + \text{H}]^+$  Calcd for  $\text{C}_{19}\text{H}_{23}\text{O}$  267.1743; Found 267.1740.

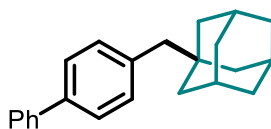

1-([1,1'-biphenyl]-4-ylmethyl)adamantane (**13**)<sup>[7]</sup>: The product **13** was purified by column chromatography (petroleum ether/ethyl acetate = 250:1~100:1). light yellow solid, 33% yield.

$^1\text{H}$  NMR (400 MHz,  $\text{CDCl}_3$ )  $\delta\text{H}$  7.60 (d,  $J = 7.3$  Hz, 2H), 7.49 (d,  $J = 8.1$  Hz, 2H), 7.42 (t,  $J = 7.6$  Hz, 2H), 7.33 (d,  $J = 7.3$  Hz, 1H), 7.15 (d,  $J = 8.1$  Hz, 2H), 2.40 (d,  $J = 5.9$  Hz, 2H), 1.95 (m, 3H), 1.69-1.66 (m, 3H), 1.60-1.55 (m, 4H), 1.52-1.51 (m, 5H).;  $^{13}\text{C}$  NMR (100 MHz,  $\text{CDCl}_3$ )  $\delta\text{C}$  141.3, 138.7, 137.6, 131.1, 129.6, 128.8, 127.1, 126.3, 51.0, 42.6, 37.2, 33.8, 28.9. HRMS (APCI-TOF)  $m/z$ :  $[\text{M} + \text{H}]^+$  Calcd for  $\text{C}_{23}\text{H}_{27}$  303.2107; Found 303.2108.

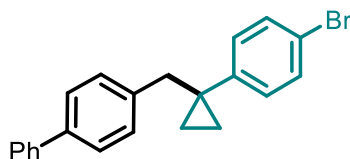

4-((1-(4-bromophenyl)cyclopropyl)methyl)-1,1'-biphenyl (**14**): The product **14** was purified by column

chromatography (petroleum ether/ethyl acetate = 200:1~100:1). white solid, 39% yield.

$^1\text{H}$  NMR (400 MHz,  $\text{CDCl}_3$ )  $\delta$  7.49 (d,  $J$  = 7.3 Hz, 2H), 7.35 (m, 4H), 7.25 (m, 3H), 6.97 (m, 4H), 2.86 (s, 2H), 0.83 (d,  $J$  = 3.6 Hz, 2H), 0.79 (d,  $J$  = 3.6 Hz, 2H).;  $^{13}\text{C}$  NMR (100 MHz,  $\text{CDCl}_3$ )  $\delta$  144.0, 140.9, 138.9, 138.5, 131.0, 130.9, 129.8, 128.7, 127.1, 126.9, 126.7, 119.7, 45.2, 26.1, 12.9. HRMS (APCI-TOF)  $m/z$ :  $[\text{M} + \text{H}]^+$  Calcd for  $\text{C}_{22}\text{H}_{20}\text{Br}$  363.0743; Found 363.0742; 365.0747.

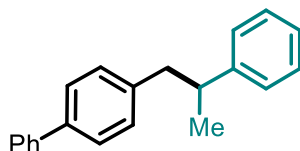

4-(2-phenylpropyl)-1,1'-biphenyl (**15**)<sup>[9]</sup>: The product **15** was purified by column chromatography (petroleum ether/ethyl acetate = 200:1~100:1).white solid, 64% yield.

$^1\text{H}$  NMR (400 MHz,  $\text{CDCl}_3$ )  $\delta$  7.49 (m, 2H), 7.39 (d,  $J$  = 8.1 Hz, 2H), 7.33 (t,  $J$  = 7.6 Hz, 2H), 7.22 (dd,  $J$  = 15.7, 7.4 Hz, 3H), 7.12 (m, 3H), 7.07 (d,  $J$  = 8.1 Hz, 2H), 2.93 (m, 2H), 2.72 (dd,  $J$  = 12.9, 7.9 Hz, 1H), 1.19 (d,  $J$  = 6.8 Hz, 3H).;  $^{13}\text{C}$  NMR (100 MHz,  $\text{CDCl}_3$ )  $\delta$  147.1, 141.2, 140.1, 138.9, 129.7, 128.8, 128.5, 127.2, 127.1, 127.09, 126.9, 126.2, 44.8, 42.0, 21.4.

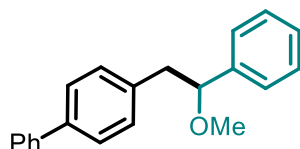

4-(2-methoxy-2-phenylethyl)-1,1'-biphenyl (**16**): The product **16** was purified by column chromatography (petroleum ether/ethyl acetate = 200:1~100:1). white solid, 50% yield.

$^1\text{H}$  NMR (400 MHz,  $\text{CDCl}_3$ )  $\delta$  7.50 (d,  $J$  = 7.9 Hz, 2H), 7.40 (d,  $J$  = 7.9 Hz, 2H), 7.34 (t,  $J$  = 7.5 Hz, 2H), 7.26 (m, 3H), 7.18 (m, 3H), 7.10 (d,  $J$  = 7.9 Hz, 2H), 4.29 (m, 1H), 3.14 (s, 3H), 3.08 (dd,  $J$  = 13.8, 7.7 Hz, 1H), 2.86 (dd,  $J$  = 13.8, 5.6 Hz, 1H).;  $^{13}\text{C}$  NMR (100 MHz,  $\text{CDCl}_3$ )  $\delta$  141.8, 141.2, 139.1, 137.8, 130.0, 128.8, 128.5, 127.8, 127.2, 127.1, 127.0, 126.9, 85.1, 56.9, 44.6. HRMS (APCI-TOF)  $m/z$ :  $[\text{M} - \text{H}]^+$  Calcd for  $\text{C}_{21}\text{H}_{21}\text{O}$  287.1436; Found 287.1429.

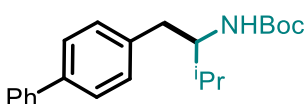

2-([1,1'-biphenyl]-4-ylmethyl)-2,3-dihydro-1H-indene (**17**): The product **17** was purified by column chromatography (petroleum ether/ethyl acetate = 150:1~20:1). white solid, 45% yield.

$^1\text{H}$  NMR (400 MHz,  $\text{CDCl}_3$ )  $\delta$  7.49 (d,  $J$  = 7.4 Hz, 2H), 7.44 (d,  $J$  = 8.1 Hz, 2xH), 7.35 (t,  $J$  = 7.6 Hz, 2H), 7.26 (d,  $J$  = 7.3 Hz, 1H), 7.19 (d,  $J$  = 7.6 Hz, 2H), 4.28 (d,  $J$  = 9.3 Hz, 1H), 3.71 (s, 1H), 2.77 (dd,

$J = 13.8, 6.1$  Hz, 1H), 2.64 (dd,  $J = 13.4, 8.2$  Hz, 1H), 1.72-1.52 (m, 1H), 1.29 (s, 9H), 0.91 (d,  $J = 6.8$  Hz, 3H), 0.87 (d,  $J = 6.8$  Hz, 3H).;  $^{13}\text{C}$  NMR (100 MHz,  $\text{CDCl}_3$ )  $\delta\text{C}$  155.9, 141.2, 139.2, 138.0, 129.8, 128.8, 127.2, 127.1, 79.1, 56.7, 38.5, 30.9, 28.5, 19.9, 17.4. HRMS (APCI-TOF)  $m/z$ :  $[\text{M} + \text{H}]^+$  Calcd for  $\text{C}_{22}\text{H}_{30}\text{NO}_2$  340.2271; Found 340.2272.

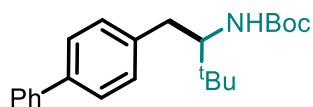

tert-butyl (1-([1,1'-biphenyl]-4-yl)-3,3-dimethylbutan-2-yl)carbamate (**18**): The product **18** was purified by column chromatography (petroleum ether/ethyl acetate = 150:1~20:1) white solid, 53% yield.

$^1\text{H}$  NMR (400 MHz,  $\text{CDCl}_3$ )  $\delta\text{H}$  7.47 (d,  $J = 7.4$  Hz, 2H), 7.41 (d,  $J = 8.1$  Hz, 2H), 7.33 (t,  $J = 7.6$  Hz, 2H), 7.24 (d,  $J = 7.3$  Hz, 1H), 7.18 (m, 2H), 4.18 (d,  $J = 10.4$  Hz, 1H), 3.66 (td,  $J = 11.2, 3.2$  Hz, 1H), 2.99 (dd,  $J = 14.1, 3.1$  Hz, 1H), 2.28 (dd,  $J = 14.0, 11.7$  Hz, 1H), 1.15 (s, 9H), 0.92 (s, 9H).;  $^{13}\text{C}$  NMR (100 MHz,  $\text{CDCl}_3$ )  $\delta\text{C}$  155.9, 141.4, 139.1, 138.7, 129.9, 129.6, 128.8, 127.1, 127.0, 78.8, 60.0, 36.6, 35.0, 28.4, 26.6. HRMS (APCI-TOF)  $m/z$ :  $[\text{M} + \text{H}]^+$  Calcd for  $\text{C}_{23}\text{H}_{32}\text{NO}_2$  354.2428; Found 354.2431.

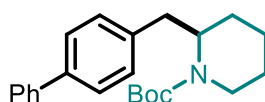

tert-butyl (R)-2-([1,1'-biphenyl]-4-ylmethyl)piperidine-1-carboxylate (**19**): The product **19** was purified by column chromatography (petroleum ether/ethyl acetate = 150:1~20:1). white solid, 56% yield.

$^1\text{H}$  NMR (400 MHz,  $\text{CDCl}_3$ )  $\delta\text{H}$  7.48 (d,  $J = 7.4$  Hz, 2H), 7.42 (d,  $J = 8.1$  Hz, 2H), 7.34 (t,  $J = 7.6$  Hz, 2H), 7.24 (t,  $J = 7.3$  Hz, 1H), 7.17 (m, 2H), 4.38 (s, 1H), 4.00 (d,  $J = 11.8$  Hz, 1H), 2.86 (m, 2H), 2.71 (m, 1H), 1.65-1.51 (m, 5H), 1.41-1.34 (m, 1H), 1.24 (s, 9H).;  $^{13}\text{C}$  NMR (100 MHz,  $\text{CDCl}_3$ )  $\delta\text{C}$  155.0, 141.3, 139.3, 138.6, 129.8, 128.8, 127.2, 127.16, 127.12, 79.2, 52.6, 39.1, 35.9, 28.4, 27.6, 25.7, 19.1. HRMS (APCI-TOF)  $m/z$ :  $[\text{M} + \text{H}]^+$  Calcd for  $\text{C}_{23}\text{H}_{30}\text{NO}_2$  352.2271; Found 352.2270.

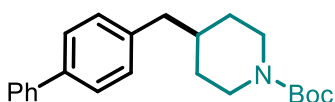

tert-butyl 4-([1,1'-biphenyl]-4-ylmethyl)piperidine-1-carboxylate (**20**): The product **20** was purified by column chromatography (petroleum ether/ethyl acetate = 150:1~20:1). white solid, 44% yield.

$^1\text{H}$  NMR (400 MHz,  $\text{CDCl}_3$ )  $\delta\text{H}$  7.51 (d,  $J = 7.5$  Hz, 2H), 7.44 (d,  $J = 8.0$  Hz, 2H), 7.36 (t,  $J = 7.6$  Hz, 2H), 7.26 (d,  $J = 7.3$  Hz, 1H), 7.14 (d,  $J = 8.0$  Hz, 2H), 4.01 (d,  $J = 12.7$  Hz, 2H), 2.58 (t,  $J = 11.9$  Hz, 2H), 2.51 (d,  $J = 6.8$  Hz, 2H), 1.60-1.53 (m, 5H), 1.38 (s, 9H).;  $^{13}\text{C}$  NMR (100 MHz,  $\text{CDCl}_3$ )  $\delta\text{C}$  155.0, 530

141.2, 139.5, 139.1, 129.7, 128.9, 127.2, 127.1, 127.1, 79.4, 44.1, 42.9, 39.3, 32.2, 28.6. HRMS (APCI-TOF)  $m/z$ :  $[M + H]^+$  Calcd for  $C_{23}H_{30}NO_2$  352.2271; Found 352.2264.

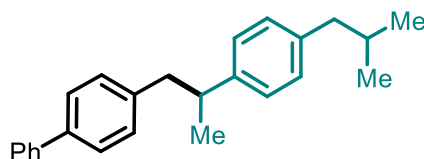

4-(2-(4-isobutylphenyl)propyl)-1,1'-biphenyl (**21**): The product **21** was purified by column chromatography (petroleum ether/ethyl acetate = 200:1~100:1) white solid, 56% yield.

$^1H$  NMR (400 MHz,  $CDCl_3$ )  $\delta$  7.49 (d,  $J = 7.8$  Hz, 2H), 7.38 (d,  $J = 8.0$  Hz, 2H), 7.33 (t,  $J = 7.6$  Hz, 2H), 7.23 (t,  $J = 7.3$  Hz, 1H), 7.05 (dd,  $J = 11.5, 8.1$  Hz, 4H), 6.98 (d,  $J = 8.0$  Hz, 2H), 2.95-2.87 (m, 2H), 2.72-2.67 (m, 1H), 2.37 (d,  $J = 7.2$  Hz, 2H), 1.80-1.74 (m, 1H), 1.17 (d,  $J = 6.6$  Hz, 3H), 0.82 (d,  $J = 6.6$  Hz, 6H).;  $^{13}C$  NMR (100 MHz,  $CDCl_3$ )  $\delta$  144.2, 141.1, 140.2, 139.3, 138.7, 129.6, 129.1, 128.7, 127.0, 127.0, 126.8, 126.8, 45.2, 44.9, 41.6, 30.4, 22.5, 21.3. HRMS (APCI-TOF)  $m/z$ :  $[M + H]^+$  Calcd for  $C_{25}H_{29}$  329.2264; Found 329.2270.

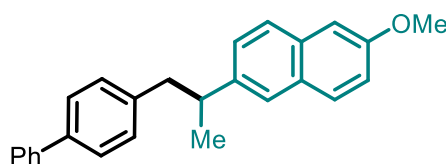

2-(1-([1,1'-biphenyl]-4-yl)propan-2-yl)-6-methoxynaphthalene (**22**): The product **22** was purified by column chromatography (petroleum ether/ethyl acetate = 200:1~50:1). white solid, 38% yield.

$^1H$  NMR (400 MHz,  $CDCl_3$ )  $\delta$  7.60 (dd,  $J = 8.9, 6.1$  Hz, 2H), 7.49 (d,  $J = 8.3$  Hz, 3H), 7.39 (d,  $J = 7.9$  Hz, 2H), 7.34 (t,  $J = 7.6$  Hz, 2H), 7.26 (dd,  $J = 13.1, 8.0$  Hz, 2H), 7.09 (d,  $J = 8.0$  Hz, 2H), 7.05 (d,  $J = 6.4$  Hz, 2H), 3.84 (s, 3H), 3.10 (dd,  $J = 14.2, 7.0$  Hz, 1H), 2.98 (m, 1H), 2.81 (dd,  $J = 13.3, 8.1$  Hz, 1H), 1.27 (d,  $J = 6.9$  Hz, 3H).;  $^{13}C$  NMR (100 MHz,  $CDCl_3$ )  $\delta$  157.4, 142.3, 141.2, 140.1, 138.9, 133.4, 129.7, 129.3, 129.2, 128.8, 127.1, 127.0, 126.96, 126.9, 126.6, 125.2, 118.8, 105.8, 55.4, 44.8, 41.9, 21.5. HRMS (APCI-TOF)  $m/z$ :  $[M + H]^+$  Calcd for  $C_{26}H_{25}O$  353.1900; Found 353.1905.

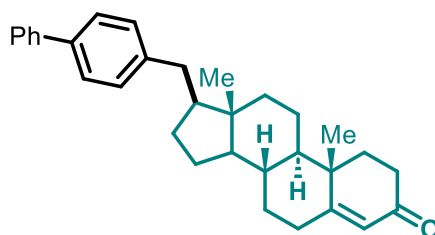

(8R,9R,10S,13S,17S)-17-([1,1'-biphenyl]-4-ylmethyl)-10,13-dimethyl-1,2,6,7,8,9,10,11,12,13,14,15,16,17-tetradecahydro-3H-cyclopenta[a]phenanthren-3-one (**23**): The product **23** was purified by column chromatography (petroleum ether/ethyl acetate = 150:1~50:1) white solid, 46% yield.

$^1\text{H}$  NMR (400 MHz,  $\text{CDCl}_3$ )  $\delta$  7.58 (d,  $J = 7.7$  Hz, 2H), 7.50 (d,  $J = 7.9$  Hz, 2H), 7.42 (t,  $J = 7.5$  Hz, 2H), 7.31 (t,  $J = 7.3$  Hz, 1H), 7.23 (m, 2H), 5.74 (s, 1H), 2.87 (dd,  $J = 13.4, 4.1$  Hz, 1H), 2.43-2.37 (m, 4H), 2.19 (t,  $J = 12.9$  Hz, 1H), 2.06-2.03 (m, 2H), 1.91-1.89 (m, 1H), 1.79-1.48 (m, 9H), 1.32-1.24 (m, 3H), 1.20 (s, 3H), 0.97 (t,  $J = 11.2$  Hz, 1H), 0.88 (s, 3H).;  $^{13}\text{C}$  NMR (100 MHz,  $\text{CDCl}_3$ )  $\delta$  199.7, 171.6, 141.2, 141.1, 138.6, 129.6, 128.8, 127.1, 127.0, 126.9, 123.9, 54.0, 50.5, 49.0, 43.3, 38.8, 37.4, 36.2, 35.9, 34.1, 33.1, 32.6, 27.1, 25.8, 21.1, 20.9, 17.6. HRMS (APCI-TOF)  $m/z$ :  $[\text{M} + \text{H}]^+$  Calcd for  $\text{C}_{32}\text{H}_{39}\text{O}$  439.2995; Found 439.2992.

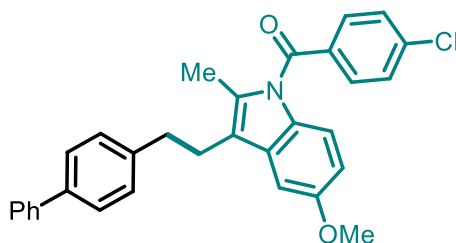

*N*-(1-(6-methylquinolin-2-yl)-2-phenylethyl)acetamide (**24**): The product **24** was purified by column chromatography (petroleum ether/ethyl acetate = 100:1~15:1). light yellow solid, 41% yield.

$^1\text{H}$  NMR (400 MHz,  $\text{CDCl}_3$ )  $\delta$  7.48 (t,  $J = 7.8$  Hz, 4H), 7.42 (d,  $J = 7.9$  Hz, 2H), 7.35 (t,  $J = 7.5$  Hz, 2H), 7.28 (m, 3H), 7.12 (d,  $J = 7.8$  Hz, 2H), 6.99 (d,  $J = 9.0$  Hz, 1H), 6.84 (d,  $J = 1.9$  Hz, 1H), 6.62 (dd,  $J = 9.0, 2.1$  Hz, 1H), 3.75 (s, 3H), 2.88 (s, 4H), 1.91 (s, 3H).;  $^{13}\text{C}$  NMR (100 MHz,  $\text{CDCl}_3$ )  $\delta$  168.4, 156.1, 141.1, 140.9, 139.2, 139.0, 134.4, 134.3, 131.3, 131.14, 131.11, 129.3, 129.1, 128.9, 127.3, 127.2, 127.1, 118.9, 115.2, 111.2, 101.6, 55.9, 35.6, 26.4, 13.2. HRMS (APCI-TOF)  $m/z$ :  $[\text{M} + \text{H}]^+$  Calcd for  $\text{C}_{31}\text{H}_{27}\text{ClNO}_2$  480.1725; Found 480.1726; 482.1715.

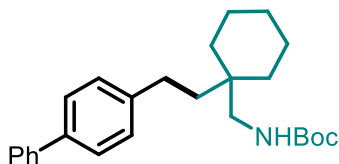

tert-butyl ((1-(2-([1,1'-biphenyl]-4-yl)ethyl)cyclohexyl)methyl)carbamate (**25**): The product **25** was purified by column chromatography (petroleum ether/ethyl acetate = 150:1~20:1) light yellow solid, 36 % yield.

$^1\text{H}$  NMR (400 MHz,  $\text{CDCl}_3$ )  $\delta$  7.57 (d,  $J = 7.7$  Hz, 2H), 7.50 (d,  $J = 7.9$  Hz, 2H), 7.42 (t,  $J = 7.6$  Hz, 2H), 7.32 (t,  $J = 7.3$  Hz, 1H), 7.27 (d,  $J = 9.6$  Hz, 2H), 4.53 (s, 1H), 3.15 (d,  $J = 6.4$  Hz, 2H), 2.59 (m, 2H), 1.60-1.57 (m, 2H), 1.49-1.39 (m, 17H), 1.31-1.29 (m, 2H).;  $^{13}\text{C}$  NMR (100 MHz,  $\text{CDCl}_3$ )  $\delta$  156.4, 142.7, 141.3, 138.8, 129.0, 128.8, 127.2, 127.16, 127.11, 79.2, 47.0, 36.8, 33.7, 29.8, 29.3, 28.6, 26.4, 21.6. HRMS (APCI-TOF)  $m/z$ :  $[\text{M} + \text{H}]^+$  Calcd for  $\text{C}_{26}\text{H}_{36}\text{NO}_2$  394.2741; Found 394.2747.

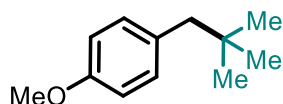

1-methoxy-4-neopentylbenzene (**26**)<sup>[10]</sup>: The product **26** was purified by column chromatography (petroleum ether/ethyl acetate = 200:1~100:1). white solid, 62% yield.

$^1\text{H}$  NMR (400 MHz,  $\text{CDCl}_3$ )  $\delta$  7.04 (d,  $J = 8.5$  Hz, 2H), 6.81 (d,  $J = 8.5$  Hz, 2H), 3.79 (s, 3H), 2.43 (s, 2H), 0.88 (s, 9H).;  $^{13}\text{C}$  NMR (100 MHz,  $\text{CDCl}_3$ )  $\delta$  157.9, 132.0, 131.5, 113.2, 55.3, 49.5, 31.9, 29.4.

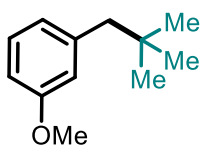

1-methoxy-3-neopentylbenzene (**27**)<sup>[10]</sup>: The product **27** was purified by column chromatography (petroleum ether/ethyl acetate = 200:1~100:1). white solid, 46% yield.

$^1\text{H}$  NMR (400 MHz,  $\text{CDCl}_3$ )  $\delta$  7.04 (d,  $J = 8.5$  Hz, 2H), 6.81 (d,  $J = 8.5$  Hz, 2H), 3.79 (s, 3H), 2.43 (s, 2H), 0.88 (s, 9H).;  $^{13}\text{C}$  NMR (100 MHz,  $\text{CDCl}_3$ )  $\delta$  159.2, 141.5, 128.6, 123.2, 116.6, 111.0, 55.3, 50.4, 31.9, 29.6.

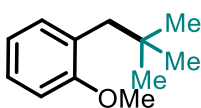

1-methoxy-2-neopentylbenzene (**28**)<sup>[10]</sup>: The product **28** was purified by column chromatography

(petroleum ether/ethyl acetate = 200:1~100:1). light yellow solid, 45% yield.

$^1\text{H}$  NMR (400 MHz,  $\text{CDCl}_3$ )  $\delta$  7.18 (t,  $J$  = 7.9 Hz, 1H), 6.74 (m, 2H), 6.68 (s, 1H), 3.80 (s, 3H), 2.47 (s, 2H), 0.91 (s, 9H).;  $^{13}\text{C}$  NMR (100 MHz,  $\text{CDCl}_3$ )  $\delta$  159.2, 141.5, 128.6, 123.2, 116.6, 111.0, 55.3, 50.4, 31.9, 29.6.

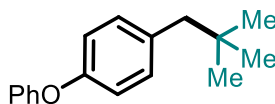

1-neopentyl-4-phenoxybenzene (**29**): The product **29** was purified by column chromatography (petroleum ether/ethyl acetate = 150:1~100:1). white solid, 54% yield.

$^1\text{H}$  NMR (400 MHz,  $\text{CDCl}_3$ )  $\delta$  7.31 (t,  $J$  = 7.8 Hz, 2H), 7.08 (d,  $J$  = 8.2 Hz, 3H), 6.99 (d,  $J$  = 8.4 Hz, 2H), 6.91 (d,  $J$  = 8.3 Hz, 2H), 2.47 (s, 2H), 0.90 (s, 9H).;  $^{13}\text{C}$  NMR (100 MHz,  $\text{CDCl}_3$ )  $\delta$  157.8, 155.3, 134.9, 131.7, 129.8, 123.0, 118.7, 118.4, 49.6, 31.9, 29.5. HRMS (APCI-TOF)  $m/z$ :  $[\text{M} + \text{H}]^+$  Calcd for  $\text{C}_{17}\text{H}_{21}\text{O}$  241.1587; Found 241.1587.

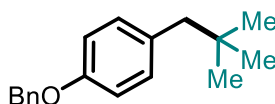

1-(benzyloxy)-4-neopentylbenzene (**30**): The product **30** was purified by column chromatography (petroleum ether/ethyl acetate = 200:1~100:1). white solid, 47% yield.

$^1\text{H}$  NMR (400 MHz,  $\text{CDCl}_3$ )  $\delta$  7.43 (d,  $J$  = 7.4 Hz, 2H), 7.37 (t,  $J$  = 7.4 Hz, 2H), 7.32 (d,  $J$  = 7.1 Hz, 1H), 7.03 (d,  $J$  = 8.4 Hz, 2H), 6.88 (d,  $J$  = 8.4 Hz, 2H), 5.03 (s, 2H), 2.43 (s, 2H), 0.88 (s, 9H).;  $^{13}\text{C}$  NMR (100 MHz,  $\text{CDCl}_3$ )  $\delta$  157.2, 137.4, 132.3, 131.5, 128.7, 128.0, 127.7, 114.1, 70.2, 49.5, 31.9, 29.5. HRMS (APCI-TOF)  $m/z$ :  $[\text{M} + \text{H}]^+$  Calcd for  $\text{C}_{18}\text{H}_{23}\text{O}$  255.1743; Found 255.1739.

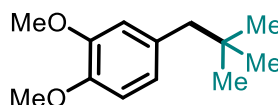

1,2-dimethoxy-4-neopentylbenzene (**31**)<sup>[12]</sup>: The product **31** was purified by column chromatography (petroleum ether/ethyl acetate = 200:1~100:1). white solid, 60% yield.

$^1\text{H}$  NMR (400 MHz,  $\text{CDCl}_3$ )  $\delta$  6.78 (d,  $J$  = 7.8 Hz, 1H), 6.66 (d,  $J$  = 8.1 Hz, 2H), 3.86 (s, 6H), 2.44 (s, 2H), 0.90 (s, 9H).;  $^{13}\text{C}$  NMR (100 MHz,  $\text{CDCl}_3$ )  $\delta$  148.2, 147.3, 132.5, 122.6, 114.1, 110.7, 56.0, 55.9, 50.0, 31.9, 29.5.

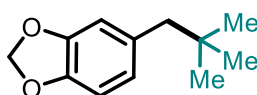

5-neopentylbenzo[d][1,3]dioxole (**32**): The product **32** was purified by column chromatography (petroleum ether/ethyl acetate = 150:1~50:1). white solid, 40% yield.

$^1\text{H}$  NMR (400 MHz,  $\text{CDCl}_3$ )  $\delta$  6.72 (d,  $J = 7.8$  Hz, 1H), 6.63 (s, 1H), 6.57 (d,  $J = 7.9$  Hz, 1H), 5.92 (s, 2H), 2.41 (s, 2H), 0.89 (s, 9H).;  $^{13}\text{C}$  NMR (100 MHz,  $\text{CDCl}_3$ )  $\delta$  147.1, 145.7, 133.7, 123.4, 111.0, 107.7, 100.8, 50.1, 31.9, 29.5. HRMS (APCI-TOF)  $m/z$ :  $[\text{M} + \text{H}]^+$  Calcd for  $\text{C}_{12}\text{H}_{17}\text{O}_2$  193.1223; Found 193.1229.

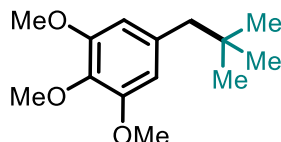

1,2,3-trimethoxy-5-neopentylbenzene (**33**): The product **33** was purified by column chromatography (petroleum ether/ethyl acetate = 150:1~100:1). white solid, 72% yield.

$^1\text{H}$  NMR (400 MHz,  $\text{CDCl}_3$ )  $\delta$  6.33 (s, 2H), 3.84 (s, 9H), 2.43 (s, 2H), 0.92 (s, 9H).;  $^{13}\text{C}$  NMR (100 MHz,  $\text{CDCl}_3$ )  $\delta$  152.5, 136.4, 135.6, 107.7, 61.0, 56.2, 50.8, 31.9, 29.6. HRMS (APCI-TOF)  $m/z$ :  $[\text{M} + \text{H}]^+$  Calcd for  $\text{C}_{14}\text{H}_{23}\text{O}_3$  239.1642; Found 239.1641.

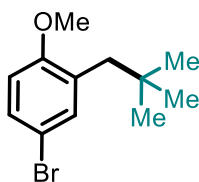

4-bromo-1-methoxy-2-neopentylbenzene (**34**): The product **34** was purified by column chromatography (petroleum ether/ethyl acetate = 200:1~100:1). white solid, 72% yield.

$^1\text{H}$  NMR (400 MHz,  $\text{CDCl}_3$ )  $\delta$  7.26 (dd,  $J = 8.7, 2.3$  Hz, 1H), 7.17 (d,  $J = 2.3$  Hz, 1H), 6.71 (d,  $J = 8.7$  Hz, 1H), 3.75 (s, 3H), 2.50 (s, 2H), 0.89 (s, 9H).;  $^{13}\text{C}$  NMR (100 MHz,  $\text{CDCl}_3$ )  $\delta$  157.4, 134.8, 131.0, 129.8, 129.75, 112.2, 55.4, 42.6, 32.6, 29.6. HRMS (APCI-TOF)  $m/z$ :  $[\text{M} + \text{H}]^+$  Calcd for  $\text{C}_{14}\text{H}_{23}\text{O}_3$  239.1642; Found 239.1641.  $\text{C}_{12}\text{H}_{18}\text{BrO}$  257.0536; Found 257.0534, 259.0512.

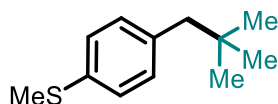

methyl(4-neopentylphenyl)sulfane (**35**)<sup>[11]</sup>: The product **35** was purified by column chromatography (petroleum ether/ethyl acetate = 200:1~100:1). white solid, 52% yield.

$^1\text{H}$  NMR (400 MHz,  $\text{CDCl}_3$ )  $\delta$  7.17 (d,  $J = 8.0$  Hz, 2H), 7.05 (d,  $J = 8.0$  Hz, 2H), 2.47 (s, 3H), 2.45 (s, 2H), 0.89 (s, 9H).;  $^{13}\text{C}$  NMR (100 MHz,  $\text{CDCl}_3$ )  $\delta$  136.9, 135.2, 131.0, 126.4, 49.7, 31.8, 29.3, 16.2.

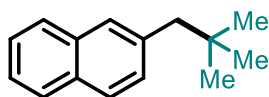

2-neopentyl-naphthalene (**38**)<sup>[13]</sup>: The product **38** was purified by column chromatography (petroleum ether/ethyl acetate = 150:1~100:1). white solid, 76% yield.

<sup>1</sup>H NMR (400 MHz, CDCl<sub>3</sub>) δH 7.83 (t, *J* = 8.1 Hz, 2H), 7.77 (d, *J* = 8.4 Hz, 1H), 7.60 (s, 1H), 7.46 (t, *J* = 6.9 Hz, 2H), 7.32 (d, *J* = 8.4 Hz, 1H), 2.70 (s, 2H), 0.99 (s, 9H).; <sup>13</sup>C NMR (100 MHz, CDCl<sub>3</sub>) δC 137.6, 133.4, 132.1, 129.6, 128.7, 127.69, 127.68, 127.0, 125.8, 125.2, 50.5, 32.2, 29.6.

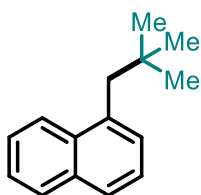

1-neopentyl-naphthalene (**39**)<sup>[14]</sup>: The product **39** was purified by column chromatography (petroleum ether/ethyl acetate = 150:1~100:1). white solid, 53% yield.

<sup>1</sup>H NMR (400 MHz, CDCl<sub>3</sub>) δH 8.12 (d, *J* = 8.2 Hz, 1H), 7.82 (d, *J* = 7.5 Hz, 1H), 7.71 (d, *J* = 8.1 Hz, 1H), 7.42 (m, 3H), 7.29 (d, *J* = 7.0 Hz, 1H), 3.02 (s, 2H), 0.97 (s, 9H).; <sup>13</sup>C NMR (100 MHz, CDCl<sub>3</sub>) δC 136.4, 134.0, 133.4, 129.0, 128.7, 126.8, 125.34, 125.32, 125.2, 125.1, 45.1, 33.2, 30.3.

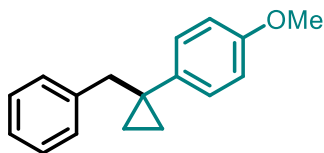

1-(1-benzylcyclopropyl)-4-methoxybenzene (**40**)<sup>[16]</sup>: The product **40** was purified by column chromatography (petroleum ether/ethyl acetate = 200:1~100:1). white solid, 52% yield.

<sup>1</sup>H NMR (400 MHz, CDCl<sub>3</sub>) δH 7.19-7.14 (m, 3H), 7.05 (dt, *J* = 6.5, 2.1 Hz, 2H), 6.97 (dd, *J* = 8.0, 2.0 Hz, 2H), 6.73 (dd, *J* = 6.6, 2.2 Hz, 2H), 3.75 (s, 3H), 2.87 (s, 2H), 0.81 (d, *J* = 2.0 Hz, 4H).; <sup>13</sup>C NMR (100 MHz, CDCl<sub>3</sub>) δC 155.7, 139.9, 137.2, 130.2, 129.5, 127.8, 125.9, 113.6, 55.2, 46.1, 25.9, 12.6.

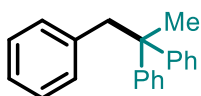

propane-1,2,2-triyltribenzene (**41**)<sup>[17]</sup>: The product **41** was purified by column chromatography (petroleum ether/ethyl acetate = 200:1~100:1). white solid, 39% yield.

<sup>1</sup>H NMR (400 MHz, CDCl<sub>3</sub>) δH 7.27-7.22 (m, 4H), 7.20-7.16 (m, 6H), 7.12-7.03 (m, 3H), 6.59 (dt, *J* = 6.8, 1.7 Hz, 2H), 3.43 (s, 2H), 1.54 (s, 3H).; <sup>13</sup>C NMR (100 MHz, CDCl<sub>3</sub>) δC 149.3, 138.1, 130.8, 127.9,

127.8, 127.3, 160.0, 125.8, 47.7, 47.2, 27.0.

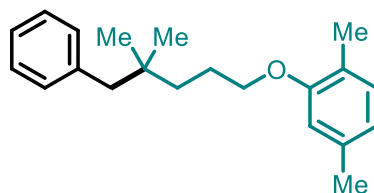

2-((4,4-dimethyl-5-phenylpentyl)oxy)-1,4-dimethylbenzene (**43**): The product **43** was purified by column chromatography (petroleum ether/ethyl acetate = 150:1~100:1) white solid, 52% yield.

$^1\text{H}$  NMR (400 MHz,  $\text{CDCl}_3$ )  $\delta$  7.28-7.19 (m, 3H), 7.13 (d,  $J$  = 7.0 Hz, 2H), 7.00 (d,  $J$  = 7.4 Hz, 1H), 6.65 (d,  $J$  = 7.5 Hz, 1H), 6.62 (s, 1H), 3.92 (t,  $J$  = 6.5 Hz, 2H), 2.54 (s, 2H), 2.31 (s, 3H), 2.18 (s, 3H), 1.86-1.82 (m, 2H), 1.40-1.36 (m, 2H), 0.90 (s, 6H).;  $^{13}\text{C}$  NMR (100 MHz,  $\text{CDCl}_3$ )  $\delta$  157.1, 139.3, 136.5, 130.6, 130.3, 127.7, 125.8, 123.7, 120.6, 112.0, 68.6, 48.4, 38.1, 34.0, 26.9, 24.5, 21.5, 15.9. HRMS (APCI-TOF)  $m/z$ :  $[\text{M} + \text{H}]^+$  Calcd for  $\text{C}_{21}\text{H}_{28}\text{O}$  297.2213; Found 297.2211.

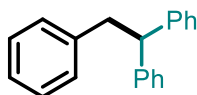

ethane-1,1,2-triyltribenzene (**44**)<sup>[18]</sup>: The product **44** was purified by column chromatography (petroleum ether/ethyl acetate = 200:1~100:1). white solid, 38% yield.

$^1\text{H}$  NMR (400 MHz,  $\text{CDCl}_3$ )  $\delta$  7.26-7.19 (m, 8H), 7.18-7.11 (m, 5H), 6.99 (dd,  $J$  = 6.6, 2.0 Hz, 2H), 4.23 (t,  $J$  = 7.8 Hz, 1H), 1.23 (d,  $J$  = 7.8 Hz, 2H).;  $^{13}\text{C}$  NMR (100 MHz,  $\text{CDCl}_3$ )  $\delta$  144.5, 140.3, 129.1, 128.4, 128.1, 126.2, 125.9, 53.1, 42.1.

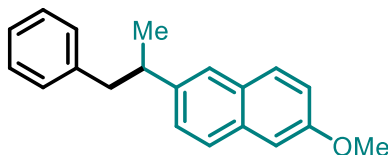

2-methoxy-6-(1-phenylpropan-2-yl)naphthalene (**45**): The product **45** was purified by column chromatography (petroleum ether/ethyl acetate = 150:1~80:1). white solid, 54% yield.

$^1\text{H}$  NMR (400 MHz,  $\text{CDCl}_3$ )  $\delta$  7.67-7.64 (m, 2H), 7.51 (d,  $J$  = 1.8 Hz, 1H), 7.31 (dd,  $J$  = 8.5, 1.8 Hz, 1H), 7.23-7.19 (m, 2H), 7.16-7.08 (m, 5H), 3.89 (s, 3H), 3.11 (m, 1H), 3.02 (dd,  $J$  = 13.3, 6.5 Hz, 1H), 2.83 (dd,  $J$  = 13.3, 8.2 Hz, 1H), 1.30 (d,  $J$  = 6.9 Hz, 3H).;  $^{13}\text{C}$  NMR (100 MHz,  $\text{CDCl}_3$ )  $\delta$  157.2, 142.2, 140.9, 133.2, 129.2, 129.1, 129.1, 128.1, 126.7, 126.5, 125.9, 125.0, 118.6, 105.6, 55.3, 45.0, 41.8, 21.3. HRMS (APCI-TOF)  $m/z$ :  $[\text{M} + \text{H}]^+$  Calcd for  $\text{C}_{20}\text{H}_{21}\text{O}$  277.1587; Found 277.1594.

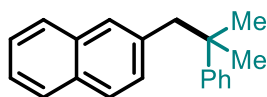

2-((4,4-dimethyl-5-phenylpentyl)oxy)-1,4-dimethylbenzene (**46**): The product **46** was purified by column chromatography (petroleum ether/ethyl acetate = 150:1~50:1). white solid, 41% yield.

$^1\text{H}$  NMR (400 MHz,  $\text{CDCl}_3$ )  $\delta$  7.76-7.74 (m, 1H), 7.68-7.65 (m, 1H), 7.58 (d,  $J$  = 8.4 Hz, 1H), 7.41-7.38 (m, 2H), 7.32-7.27 (m, 5H), 7.23-7.19 (m, 1H), 6.87 (dd,  $J$  = 8.4, 1.8 Hz, 1H), 3.03 (s, 2H), 1.37 (s, 6H);  $^{13}\text{C}$  NMR (100 MHz,  $\text{CDCl}_3$ )  $\delta$  148.9, 136.6, 133.1, 132.0, 129.2, 128.8, 128.0, 127.6, 127.5, 126.7, 126.3, 125.7, 125.6, 125.1, 51.3, 39.1, 28.3. HRMS (APCI-TOF)  $m/z$ :  $[\text{M} + \text{H}]^+$  Calcd for  $\text{C}_{20}\text{H}_{21}$  261.1638; Found 261.1633.

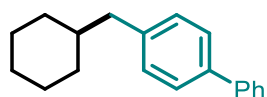

4-(cyclohexylmethyl)-1,1'-biphenyl (**47**)<sup>[8]</sup>: The product **47** was purified by column chromatography (petroleum ether/ethyl acetate = 200:1~100:1). white solid, 39% yield.

$^1\text{H}$  NMR (400 MHz,  $\text{CDCl}_3$ )  $\delta$  7.59 (m, 2H), 7.51 (dd,  $J$  = 8.3, 2.1 Hz, 2H), 7.43 (t,  $J$  = 7.6 Hz, 2H), 7.33 (m, 1H), 7.23 (m, 2H), 2.53 (d,  $J$  = 7.1 Hz, 2H), 1.74-1.55 (m, 5H), 1.26-1.83 (m, 4H), 1.04-0.96 (m, 2H);  $^{13}\text{C}$  NMR (100 MHz,  $\text{CDCl}_3$ )  $\delta$  141.3, 140.7, 138.6, 129.7, 128.8, 127.1, 127.07, 126.9, 43.9, 39.9, 33.3, 26.7, 26.5.

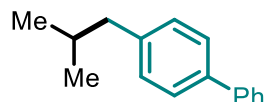

4-isobutyl-1,1'-biphenyl (**48**): The product **48** was purified by column chromatography (petroleum ether/ethyl acetate = 200:1~100:1). white solid, 36% yield. <sup>[19]</sup>

$^1\text{H}$  NMR (400 MHz,  $\text{CDCl}_3$ )  $\delta$  7.60-7.57 (m, 2H), 7.51 (d,  $J$  = 8.2 Hz, 2H), 7.00 (t,  $J$  = 7.4 Hz, 2H), 7.32 (d,  $J$  = 7.3 Hz, 1H), 7.21 (d,  $J$  = 8.2 Hz, 2H), 2.51 (d,  $J$  = 7.2 Hz, 2H), 1.94-1.87 (m, 1H), 0.93 (d,  $J$  = 6.6 Hz, 6H);  $^{13}\text{C}$  NMR (100 MHz,  $\text{CDCl}_3$ )  $\delta$  141.2, 140.9, 138.6, 129.5, 128.7, 127.0, 127.0, 126.8, 45.1, 30.3, 22.4.

## 5.9 Determination of absolute configuration of compound 26

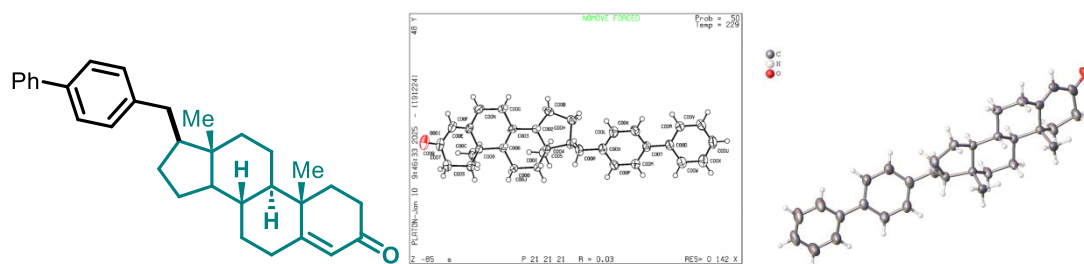

CCDC: 2416104

Table 1 Crystal data and structure refinement for 26.

|                                    |                                               |
|------------------------------------|-----------------------------------------------|
| Identification code                | s                                             |
| Empirical formula                  | C <sub>32</sub> H <sub>38</sub> O             |
| Formula weight                     | 438.62                                        |
| Temperature/K                      | 229.00                                        |
| Crystal system                     | orthorhombic                                  |
| Space group                        | P2 <sub>1</sub> 2 <sub>1</sub> 2 <sub>1</sub> |
| a/Å                                | 6.2977(4)                                     |
| b/Å                                | 14.2719(9)                                    |
| c/Å                                | 27.7472(18)                                   |
| α/°                                | 90                                            |
| β/°                                | 90                                            |
| γ/°                                | 90                                            |
| Volume/Å <sup>3</sup>              | 2493.9(3)                                     |
| Z                                  | 4                                             |
| ρ <sub>calc</sub> /cm <sup>3</sup> | 1.168                                         |
| μ/mm <sup>-1</sup>                 | 0.514                                         |
| F(000)                             | 952.0                                         |
| Crystal size/mm <sup>3</sup>       | 0.3 × 0.1 × 0.1                               |
| Radiation                          | CuKα (λ = 1.54178)                            |
| 2θ range for data collection/°     | 6.37 to 136.608                               |
| Index ranges                       | -6 ≤ h ≤ 7, -17 ≤ k ≤ 17, -33 ≤ l ≤ 31        |

|                                                |                                                                  |
|------------------------------------------------|------------------------------------------------------------------|
| Reflections collected                          | 45421                                                            |
| Independent reflections                        | 4510 [ $R_{\text{int}} = 0.0307$ , $R_{\text{sigma}} = 0.0141$ ] |
| Data/restraints/parameters                     | 4510/0/300                                                       |
| Goodness-of-fit on $F^2$                       | 1.028                                                            |
| Final R indexes [ $I \geq 2\sigma(I)$ ]        | $R_1 = 0.0326$ , $wR_2 = 0.0891$                                 |
| Final R indexes [all data]                     | $R_1 = 0.0330$ , $wR_2 = 0.0894$                                 |
| Largest diff. peak/hole / $e \text{ \AA}^{-3}$ | 0.15/-0.12                                                       |
| Flack parameter                                | 0.04(6)                                                          |

Table 2 Fractional Atomic Coordinates ( $\times 10^4$ ) and Equivalent Isotropic Displacement Parameters ( $\text{\AA}^2 \times 10^3$ ) for s.  $U_{\text{eq}}$  is defined as 1/3 of the trace of the orthogonalised  $U_{ij}$  tensor.

| Atom | x       | y           | z         | U(eq)   |
|------|---------|-------------|-----------|---------|
| O001 | 7778(3) | -2525.9(11) | 7249.8(6) | 63.0(4) |
| C002 | 6322(2) | 2607.9(11)  | 6465.5(5) | 27.0(3) |
| C003 | 5930(2) | 1803.7(11)  | 6816.0(5) | 27.3(3) |
| C004 | 5174(3) | 3693.6(11)  | 5852.4(6) | 30.5(3) |
| C005 | 4451(3) | 2795.7(11)  | 6123.9(5) | 28.5(3) |
| C006 | 5420(2) | 909.1(11)   | 6528.2(5) | 28.5(3) |
| C007 | 6760(3) | 6171.5(11)  | 4604.8(6) | 34.9(4) |
| C008 | 4984(3) | 39.0(11)    | 6855.0(6) | 30.9(3) |
| C009 | 6612(3) | 4430.2(11)  | 5097.8(6) | 37.2(4) |
| C00A | 6423(3) | 3532.4(12)  | 5382.3(6) | 40.6(4) |
| C00B | 6831(3) | 3579.7(11)  | 6667.7(6) | 33.8(4) |
| C00C | 2884(3) | 149.0(14)   | 7139.8(7) | 44.0(4) |
| C00D | 6810(3) | 7098.3(12)  | 4354.7(6) | 38.2(4) |
| C00E | 6769(3) | -62.1(12)   | 7222.8(6) | 32.9(4) |
| C00F | 7663(3) | -892.3(14)  | 7323.9(6) | 39.8(4) |
| C00G | 7838(3) | 1630.7(12)  | 7143.0(6) | 35.9(4) |

|      |         |             |            |         |
|------|---------|-------------|------------|---------|
| C00H | 6492(3) | 4237.3(12)  | 6235.1(6)  | 40.2(4) |
| C00I | 2409(3) | 3067.2(14)  | 6398.5(7)  | 39.4(4) |
| C00J | 4073(3) | 1912.2(11)  | 5829.0(6)  | 38.1(4) |
| C00K | 8461(3) | 5852.3(13)  | 4877.5(7)  | 43.8(4) |
| C00L | 8392(3) | 4999.2(13)  | 5118.2(7)  | 44.0(4) |
| C00M | 4992(3) | 5584.3(13)  | 4576.6(7)  | 42.1(4) |
| C00N | 7432(3) | 811.2(13)   | 7483.4(6)  | 40.1(4) |
| C00O | 3636(3) | 1067.3(12)  | 6156.7(6)  | 38.4(4) |
| C00P | 4937(3) | 4735.3(13)  | 4816.4(7)  | 42.3(4) |
| C00Q | 6933(3) | -1785.7(13) | 7136.1(7)  | 44.2(4) |
| C00R | 8316(4) | 7765.0(14)  | 4468.9(8)  | 56.8(6) |
| C00S | 4902(4) | -836.8(12)  | 6536.9(7)  | 45.6(5) |
| C00T | 5029(4) | -1756.8(13) | 6817.7(8)  | 53.0(5) |
| C00U | 6934(5) | 8836.6(14)  | 3887.5(8)  | 57.3(6) |
| C00V | 8374(5) | 8623.7(15)  | 4237.2(8)  | 64.5(7) |
| C00W | 5390(4) | 7327.4(16)  | 3992.6(10) | 63.1(6) |
| C00X | 5443(5) | 8187.4(17)  | 3762.6(10) | 70.2(7) |

Table 3 Anisotropic Displacement Parameters ( $\text{\AA}^2 \times 10^3$ ) for s. The Anisotropic displacement factor exponent takes the form:  $-2\pi^2[h^2a^2U_{11}+2hka*b*U_{12}+\dots]$ .

| Atom | $U_{11}$ | $U_{22}$ | $U_{33}$ | $U_{23}$ | $U_{13}$ | $U_{12}$ |
|------|----------|----------|----------|----------|----------|----------|
| O001 | 74.3(11) | 48.2(8)  | 66.5(10) | 19.7(7)  | 5.8(8)   | 21.9(8)  |
| C002 | 25.1(7)  | 30.2(8)  | 25.8(7)  | -1.3(6)  | 2.0(6)   | -1.3(6)  |
| C003 | 24.6(7)  | 32.4(8)  | 24.9(7)  | 0.1(6)   | -0.5(6)  | 0.0(6)   |
| C004 | 35.1(8)  | 26.4(7)  | 29.9(8)  | 2.0(6)   | 2.7(6)   | 1.0(6)   |
| C005 | 29.2(8)  | 30.2(8)  | 26.1(7)  | 3.6(6)   | -0.3(6)  | -2.0(6)  |

Table 3 Anisotropic Displacement Parameters ( $\text{\AA}^2 \times 10^3$ ) for s. The Anisotropic displacement factor exponent takes the form:  $-2\pi^2[h^2a^2U_{11}+2hka*b*U_{12}+\dots]$ .

| Atom | $U_{11}$ | $U_{22}$ | $U_{33}$ | $U_{23}$ | $U_{13}$  | $U_{12}$  |
|------|----------|----------|----------|----------|-----------|-----------|
| C006 | 29.5(7)  | 30.6(8)  | 25.3(7)  | 3.4(6)   | 0.0(6)    | -1.6(6)   |
| C007 | 45.1(9)  | 30.5(8)  | 29.2(7)  | -0.3(6)  | 6.7(7)    | -2.5(7)   |
| C008 | 27.8(7)  | 33.9(8)  | 31.0(8)  | 8.9(7)   | -2.4(6)   | -1.3(7)   |
| C009 | 49.8(10) | 29.9(8)  | 31.8(8)  | -0.5(7)  | 11.1(8)   | 0.0(7)    |
| C00A | 56.4(11) | 29.7(8)  | 35.6(8)  | 2.9(7)   | 12.1(8)   | 0.5(8)    |
| C00B | 34.8(8)  | 33.0(8)  | 33.6(8)  | -5.3(7)  | 0.9(7)    | -3.2(7)   |
| C00C | 28.4(8)  | 50.7(10) | 52.8(11) | 22.7(9)  | 3.0(8)    | -0.5(8)   |
| C00D | 52.2(10) | 30.0(8)  | 32.5(8)  | -0.9(6)  | 6.7(8)    | -3.9(8)   |
| C00E | 26.1(7)  | 44.1(9)  | 28.6(8)  | 11.6(7)  | 3.1(6)    | 0.7(7)    |
| C00F | 30.6(8)  | 51.3(10) | 37.7(9)  | 17.2(8)  | 1.6(7)    | 4.7(8)    |
| C00G | 32.9(8)  | 40.6(9)  | 34.2(8)  | 2.1(7)   | -9.3(7)   | -1.6(7)   |
| C00H | 50.5(10) | 29.8(8)  | 40.2(9)  | -2.1(7)  | -1.2(8)   | -5.1(8)   |
| C00I | 26.3(8)  | 46.8(10) | 45.1(10) | 12.1(8)  | 2.5(7)    | 1.7(7)    |
| C00J | 52.1(10) | 31.2(8)  | 31.1(8)  | 5.2(7)   | -12.5(8)  | -7.4(8)   |
| C00K | 42.6(10) | 39.0(9)  | 49.8(10) | 7.5(8)   | 3.0(9)    | -7.9(8)   |
| C00L | 42.8(10) | 42.8(9)  | 46.4(10) | 9.8(8)   | 4.5(8)    | 0.4(9)    |
| C00M | 48.7(11) | 39.9(9)  | 37.7(9)  | 5.8(8)   | -4.3(8)   | -7.6(8)   |
| C00N | 40.3(9)  | 51.1(10) | 29.0(8)  | 5.7(8)   | -8.1(7)   | -0.2(8)   |
| C00O | 50.1(10) | 31.6(8)  | 33.6(8)  | 6.8(7)   | -16.0(8)  | -10.2(8)  |
| C00P | 50.1(11) | 37.2(9)  | 39.6(9)  | 1.8(7)   | 1.8(8)    | -12.5(8)  |
| C00Q | 46.7(10) | 43.2(10) | 42.6(9)  | 19.1(8)  | 11.1(9)   | 9.5(9)    |
| C00R | 82.1(16) | 41.4(10) | 46.9(11) | 8.9(8)   | -20.2(11) | -19.2(11) |
| C00S | 62.8(12) | 31.3(9)  | 42.8(10) | 7.2(8)   | -11.5(9)  | -1.9(9)   |
| C00T | 68.4(14) | 33.2(9)  | 57.6(12) | 12.1(9)  | -9.2(11)  | -3.6(10)  |

Table 3 Anisotropic Displacement Parameters ( $\text{\AA}^2 \times 10^3$ ) for s. The Anisotropic displacement factor exponent takes the form:  $-2\pi^2[h^2a^2U_{11}+2hka*b*U_{12}+\dots]$ .

| Atom | $U_{11}$ | $U_{22}$ | $U_{33}$ | $U_{23}$ | $U_{13}$  | $U_{12}$  |
|------|----------|----------|----------|----------|-----------|-----------|
| C00U | 90.6(17) | 31.2(9)  | 50.0(11) | 8.9(8)   | 1.0(12)   | -5.4(11)  |
| C00V | 99.7(19) | 39.1(11) | 54.8(12) | 5.7(9)   | -15.0(13) | -26.9(12) |
| C00W | 63.0(14) | 46.6(12) | 79.9(16) | 21.2(11) | -20.5(12) | -14.8(11) |
| C00X | 76.9(16) | 51.8(13) | 81.9(17) | 26.2(12) | -21.7(14) | -8.0(13)  |

Table 4 Bond Lengths for s.

| Atom | Atom | Length/ $\text{\AA}$ | Atom | Atom | Length/ $\text{\AA}$ |
|------|------|----------------------|------|------|----------------------|
| O001 | C00Q | 1.224(2)             | C009 | C00A | 1.510(2)             |
| C002 | C003 | 1.525(2)             | C009 | C00L | 1.385(3)             |
| C002 | C005 | 1.536(2)             | C009 | C00P | 1.383(3)             |
| C002 | C00B | 1.530(2)             | C00B | C00H | 1.539(2)             |
| C003 | C006 | 1.540(2)             | C00D | C00R | 1.380(3)             |
| C003 | C00G | 1.526(2)             | C00D | C00W | 1.384(3)             |
| C004 | C005 | 1.555(2)             | C00E | C00F | 1.341(3)             |
| C004 | C00A | 1.540(2)             | C00E | C00N | 1.500(3)             |
| C004 | C00H | 1.555(2)             | C00F | C00Q | 1.452(3)             |
| C005 | C00I | 1.544(2)             | C00G | C00N | 1.525(2)             |
| C005 | C00J | 1.522(2)             | C00J | C00O | 1.535(2)             |
| C006 | C008 | 1.562(2)             | C00K | C00L | 1.389(3)             |
| C006 | C00O | 1.541(2)             | C00M | C00P | 1.383(2)             |
| C007 | C00D | 1.494(2)             | C00Q | C00T | 1.490(3)             |
| C007 | C00K | 1.389(3)             | C00R | C00V | 1.385(3)             |
| C007 | C00M | 1.396(3)             | C00S | C00T | 1.529(2)             |

Table 4 Bond Lengths for s.

| Atom Atom | Length/Å | Atom Atom | Length/Å |
|-----------|----------|-----------|----------|
| C008 C00C | 1.549(2) | C00U C00V | 1.362(4) |
| C008 C00E | 1.525(2) | C00U C00X | 1.364(4) |
| C008 C00S | 1.531(2) | C00W C00X | 1.384(3) |

Table 5 Bond Angles for s.

| Atom Atom Atom | Angle/°    | Atom Atom Atom | Angle/°    |
|----------------|------------|----------------|------------|
| C003 C002 C005 | 113.63(12) | C00P C009 C00L | 117.12(16) |
| C003 C002 C00B | 118.85(13) | C009 C00A C004 | 110.88(14) |
| C00B C002 C005 | 103.23(13) | C002 C00B C00H | 103.75(13) |
| C002 C003 C006 | 109.09(12) | C00R C00D C007 | 121.20(18) |
| C002 C003 C00G | 111.93(13) | C00R C00D C00W | 116.60(17) |
| C00G C003 C006 | 109.77(13) | C00W C00D C007 | 122.19(18) |
| C005 C004 C00H | 103.69(12) | C00F C00E C008 | 122.19(16) |
| C00A C004 C005 | 115.89(13) | C00F C00E C00N | 121.08(15) |
| C00A C004 C00H | 112.34(15) | C00N C00E C008 | 116.69(14) |
| C002 C005 C004 | 102.62(13) | C00E C00F C00Q | 124.60(16) |
| C002 C005 C00I | 112.23(12) | C00N C00G C003 | 111.13(14) |
| C00I C005 C004 | 106.02(13) | C00B C00H C004 | 107.61(13) |
| C00J C005 C002 | 107.90(13) | C005 C00J C00O | 111.12(13) |
| C00J C005 C004 | 117.91(13) | C007 C00K C00L | 121.68(18) |
| C00J C005 C00I | 110.05(15) | C009 C00L C00K | 121.30(18) |
| C003 C006 C008 | 113.24(12) | C00P C00M C007 | 121.27(19) |
| C003 C006 C00O | 112.17(13) | C00E C00N C00G | 112.67(13) |
| C00O C006 C008 | 112.11(12) | C00J C00O C006 | 112.35(14) |

Table 5 Bond Angles for s.

| Atom | Atom | Atom | Angle/°    | Atom | Atom | Atom | Angle/°    |
|------|------|------|------------|------|------|------|------------|
| C00K | C007 | C00D | 121.83(17) | C009 | C00P | C00M | 121.91(18) |
| C00K | C007 | C00M | 116.68(16) | O001 | C00Q | C00F | 121.85(19) |
| C00M | C007 | C00D | 121.48(17) | O001 | C00Q | C00T | 121.8(2)   |
| C00C | C008 | C006 | 111.46(13) | C00F | C00Q | C00T | 116.31(16) |
| C00E | C008 | C006 | 109.50(13) | C00D | C00R | C00V | 121.4(2)   |
| C00E | C008 | C00C | 107.33(13) | C00T | C00S | C008 | 113.93(15) |
| C00E | C008 | C00S | 109.46(14) | C00Q | C00T | C00S | 111.59(17) |
| C00S | C008 | C006 | 108.67(13) | C00V | C00U | C00X | 119.19(19) |
| C00S | C008 | C00C | 110.39(15) | C00U | C00V | C00R | 120.7(2)   |
| C00L | C009 | C00A | 122.68(18) | C00X | C00W | C00D | 121.9(2)   |
| C00P | C009 | C00A | 120.16(18) | C00U | C00X | C00W | 120.1(2)   |

Table 6 Torsion Angles for s.

| A    | B    | C    | D    | Angle/°     | A    | B    | C    | D    | Angle/°     |
|------|------|------|------|-------------|------|------|------|------|-------------|
| O001 | C00Q | C00T | C00S | -152.5(2)   | C00B | C002 | C005 | C004 | 44.21(14)   |
| C002 | C003 | C006 | C008 | -179.85(12) | C00B | C002 | C005 | C00I | -69.18(16)  |
| C002 | C003 | C006 | C00O | -51.74(17)  | C00B | C002 | C005 | C00J | 169.41(13)  |
| C002 | C003 | C00G | C00N | -178.79(13) | C00C | C008 | C00E | C00F | 103.06(19)  |
| C002 | C005 | C00J | C00O | 57.58(19)   | C00C | C008 | C00E | C00N | -74.62(18)  |
| C002 | C00B | C00H | C004 | 16.78(18)   | C00C | C008 | C00S | C00T | -71.7(2)    |
| C003 | C002 | C005 | C004 | 174.29(12)  | C00D | C007 | C00K | C00L | 178.57(17)  |
| C003 | C002 | C005 | C00I | 60.90(17)   | C00D | C007 | C00M | C00P | -178.72(17) |
| C003 | C002 | C005 | C00J | -60.51(17)  | C00D | C00R | C00V | C00U | 0.0(4)      |
| C003 | C002 | C00B | C00H | -164.45(14) | C00D | C00W | C00X | C00U | 0.6(4)      |

Table 6 Torsion Angles for s.

| A    | B    | C    | D    | Angle/°     | A    | B    | C    | D    | Angle/°     |
|------|------|------|------|-------------|------|------|------|------|-------------|
| C003 | C006 | C008 | C00C | 68.37(17)   | C00E | C008 | C00S | C00T | 46.3(2)     |
| C003 | C006 | C008 | C00E | -50.24(17)  | C00E | C00F | C00Q | O001 | -178.18(19) |
| C003 | C006 | C008 | C00S | -169.76(14) | C00E | C00F | C00Q | C00T | -1.3(3)     |
| C003 | C006 | C00O | C00J | 52.21(19)   | C00F | C00E | C00N | C00G | 132.88(17)  |
| C003 | C00G | C00N | C00E | 53.6(2)     | C00F | C00Q | C00T | C00S | 30.5(3)     |
| C004 | C005 | C00J | C00O | 173.11(15)  | C00G | C003 | C006 | C008 | 57.17(17)   |
| C005 | C002 | C003 | C006 | 57.41(16)   | C00G | C003 | C006 | C00O | -174.71(13) |
| C005 | C002 | C003 | C00G | 179.09(13)  | C00H | C004 | C005 | C002 | -32.96(16)  |
| C005 | C002 | C00B | C00H | -37.61(16)  | C00H | C004 | C005 | C00I | 84.92(16)   |
| C005 | C004 | C00A | C009 | 167.46(16)  | C00H | C004 | C005 | C00J | -151.33(15) |
| C005 | C004 | C00H | C00B | 10.08(18)   | C00H | C004 | C00A | C009 | -73.6(2)    |
| C005 | C00J | C00O | C006 | -55.4(2)    | C00I | C005 | C00J | C00O | -65.17(18)  |
| C006 | C003 | C00G | C00N | -57.51(18)  | C00K | C007 | C00D | C00R | -14.9(3)    |
| C006 | C008 | C00E | C00F | -135.80(16) | C00K | C007 | C00D | C00W | 163.8(2)    |
| C006 | C008 | C00E | C00N | 46.52(19)   | C00K | C007 | C00M | C00P | 1.1(3)      |
| C006 | C008 | C00S | C00T | 165.82(17)  | C00L | C009 | C00A | C004 | 97.2(2)     |
| C007 | C00D | C00R | C00V | 179.8(2)    | C00L | C009 | C00P | C00M | -2.0(3)     |
| C007 | C00D | C00W | C00X | 179.9(2)    | C00M | C007 | C00D | C00R | 164.9(2)    |
| C007 | C00K | C00L | C009 | -0.3(3)     | C00M | C007 | C00D | C00W | -16.4(3)    |
| C007 | C00M | C00P | C009 | 0.6(3)      | C00M | C007 | C00K | C00L | -1.2(3)     |
| C008 | C006 | C00O | C00J | -179.08(14) | C00N | C00E | C00F | C00Q | 171.61(16)  |
| C008 | C00E | C00F | C00Q | -6.0(3)     | C00O | C006 | C008 | C00C | -59.78(19)  |
| C008 | C00E | C00N | C00G | -49.4(2)    | C00O | C006 | C008 | C00E | -178.38(14) |
| C008 | C00S | C00T | C00Q | -54.3(2)    | C00O | C006 | C008 | C00S | 62.09(18)   |
| C00A | C004 | C005 | C002 | 90.62(17)   | C00P | C009 | C00A | C004 | -80.2(2)    |

Table 6 Torsion Angles for s.

| A    | B    | C    | D    | Angle/°     | A    | B    | C    | D    | Angle/°    |
|------|------|------|------|-------------|------|------|------|------|------------|
| C00A | C004 | C005 | C00I | -151.50(15) | C00P | C009 | C00L | C00K | 1.9(3)     |
| C00A | C004 | C005 | C00J | -27.7(2)    | C00R | C00D | C00W | C00X | -1.3(4)    |
| C00A | C004 | C00H | C00B | -115.79(15) | C00S | C008 | C00E | C00F | -16.8(2)   |
| C00A | C009 | C00L | C00K | -175.62(17) | C00S | C008 | C00E | C00N | 165.55(15) |
| C00A | C009 | C00P | C00M | 175.53(17)  | C00V | C00U | C00X | C00W | 0.5(4)     |
| C00B | C002 | C003 | C006 | 179.16(13)  | C00W | C00D | C00R | C00V | 1.0(4)     |
| C00B | C002 | C003 | C00G | -59.16(19)  | C00X | C00U | C00V | C00R | -0.8(4)    |

Table 7 Hydrogen Atom Coordinates ( $\text{\AA} \times 10^4$ ) and Isotropic Displacement Parameters ( $\text{\AA}^2 \times 10^3$ ) for s.

| Atom | x       | y       | z       | U(eq) |
|------|---------|---------|---------|-------|
| H002 | 7541.76 | 2422.44 | 6261.62 | 32    |
| H003 | 4688.28 | 1961.78 | 7019.33 | 33    |
| H004 | 3895.54 | 4068.35 | 5775.08 | 37    |
| H006 | 6713.71 | 760.2   | 6340.44 | 34    |
| H00A | 7844.36 | 3296.7  | 5459.26 | 49    |
| H00B | 5696.63 | 3058.57 | 5186.92 | 49    |
| H00C | 8300.44 | 3610.64 | 6783.03 | 41    |
| H00D | 5872.44 | 3740.21 | 6933.31 | 41    |
| H00E | 2885.44 | 744.85  | 7307.92 | 66    |
| H00F | 2756.82 | -356.63 | 7371.64 | 66    |
| H00G | 1693.47 | 127.57  | 6918.19 | 66    |
| H00H | 8844.85 | -895.95 | 7530.84 | 48    |
| H00I | 9090.53 | 1496.75 | 6945.11 | 43    |
| H00J | 8129.94 | 2196.47 | 7331.88 | 43    |

Table 7 Hydrogen Atom Coordinates ( $\text{\AA}\times 10^4$ ) and Isotropic Displacement Parameters ( $\text{\AA}^2\times 10^3$ ) for s.

| Atom | x       | y        | z       | U(eq) |
|------|---------|----------|---------|-------|
| H00K | 7863.13 | 4426.09  | 6099.29 | 48    |
| H00L | 5728.21 | 4801.98  | 6336.78 | 48    |
| H00M | 2085.05 | 2588.89  | 6635.68 | 59    |
| H00N | 1239.45 | 3120.03  | 6172.62 | 59    |
| H00O | 2619.83 | 3663.22  | 6559.5  | 59    |
| H00P | 5324.13 | 1784.23  | 5629.52 | 46    |
| H00Q | 2859.23 | 2009.53  | 5613.8  | 46    |
| H00R | 9691.44 | 6222.77  | 4899.89 | 53    |
| H00S | 9575.7  | 4804.24  | 5298.51 | 53    |
| H00T | 3815.85 | 5769.57  | 4391.04 | 51    |
| H00U | 8729.14 | 682.24   | 7667.03 | 48    |
| H00V | 6319.18 | 986.69   | 7713.05 | 48    |
| H00W | 3484.76 | 504.09   | 5957.62 | 46    |
| H00X | 2292.1  | 1166.31  | 6327.35 | 46    |
| H00Y | 3726.02 | 4354.54  | 4787.31 | 51    |
| H00Z | 9324.58 | 7633     | 4709.31 | 68    |
| H00  | 3578.07 | -828.99  | 6351.54 | 55    |
| H    | 6082.52 | -813.13  | 6307.04 | 55    |
| H1   | 3746.4  | -1828.96 | 7014.14 | 64    |
| HA   | 5087.02 | -2281.78 | 6590.37 | 64    |
| H2   | 6968.37 | 9423.69  | 3734.05 | 69    |
| H3   | 9417.83 | 9064.65  | 4322.1  | 77    |
| H4   | 4360.53 | 6885.77  | 3900.22 | 76    |
| H5   | 4448.52 | 8324.5   | 3519.93 | 84    |

## 6. References

- [1.] Ghosh, I.; Khamrai, J.; Savateev, A.; Shlapakov, N.; Antonietti, M.; König, B. Organic semiconductor photocatalyst can bifunctionalize arenes and heteroarenes. *Science*, **2019**, *365*, 360-366.
- [2] Li, F.; Dong, J.; Liao, H.; Dang, J.; Zhou, X.; Wang, Y.; Wang, C.; Jiang, Q.; Li, G.; Xue, D. Photoinduced generation of alkyl and phthalimide nitrogen radicals from N-hydroxyphthalimide esters for the synthesis of benzophenone-type bioisosteres. *Sci China Chem*, **2024**, *67*, 3389-3396.
- [3] Yue, H. F.; Zhu, C.; Shen, L.; Geng, Q. Y.; Hock, K. J.; Yuan, T. T.; Cavallo, L. G.; Rueping, M. Nickel-catalyzed C–N bond activation: activated primary amines as alkylating reagents in reductive cross-coupling. *Chem. Sci.*, **2019**, *10*, 4430-4435.
- [4] Gutiérrez-Bonet, Á.; Tellis, J. C.; Matsui, J. K.; Vara, B. A.; Molander, G. A. 1,4-Dihydropyridines as Alkyl Radical Precursors: Introducing the Aldehyde Feedstock to Nickel/Photoredox Dual Catalysis. *ACS Catal.*, **2016**, *6*, 8004-8008.
- [5] Cook, A.; MacLean, H.; Onge, P. S.; Newman, S. G. Nickel-Catalyzed Reductive Deoxygenation of Diverse C–O Bond-Bearing Functional Groups. *ACS Catal.*, **2021**, *11*, 13337-13347.
- [6] Cho, C.-H.; Sun, M.; Seo, Y.-S.; Kim, C.-B.; Park, K. Nickel-Catalyzed Cross-Coupling of Neopentyl Arenesulfonates with Methyl and Primary Alkylmagnesium Bromides. *J. Org. Chem.*, **2005**, *70*, 1482-1485.
- [7] Zhua, C.; Zhang, J. Nickel-catalyzed alkyl-alkyl cross-coupling reactions of non-activated secondary alkyl bromides with aldehydes as alkyl carbanion equivalents. *Chem. Commun.*, **2019**, *55*, 2793-2796.
- [8] Pilli, R.; Selvam, K.; Balamurugan, B. S. S.; Jose, V.; Rasappan, R. C(sp<sup>3</sup>)-C(sp<sup>3</sup>) Coupling of Cycloalkanes and Alkyl Halides via Dual Photocatalytic Hydrogen Atom Transfer and Nickel Catalysis. *Org. Lett.*, **2024**, *26*, 2993-2998.
- [9] Yang, W.; Zhao, Z.; Lan, Y.; Dong, Z.; Bai, Y.; Li, S.; Niu, L. Distinguishing Similar Benzyl Radicals via Metal-Mediated Noncovalent Interactions for Csp<sup>3</sup>-Csp<sup>3</sup> Coupling. *ChemRxiv*, **2023**, 1-10.
- [10] Patel, S.; Chakraborty, A.; Chatterjee, I. C(sp<sup>3</sup>)-C(sp<sup>3</sup>) Radical-Cross-Coupling Reaction via Photoexcitation. *Org. Lett.*, **2023**, *25*, 8246-8251.

- [11] Zhou, J.; Fu, G. C. Suzuki Cross-Couplings of Unactivated Secondary Alkyl Bromides and Iodides. *J. Am. Chem. Soc.*, **2004**, *126*, 1340-1341.
- [12] Hwang, J.; Hong, Y.-T.; Kim, S. Anionic Reactions of N-(trans-2,3-Diphenylaziridin-1-yl)imines and Their Use as 1,1-Dipoles in Anionic Cyclizations. *Adv. Synth. Catal.*, **2005**, *347*, 1513-1516.
- [13] Tobisu, M.; Takahira, T.; Chatani, N. Nickel-Catalyzed Cross-Coupling of Anisoles with Alkyl Grignard Reagents via C-O Bond Cleavage. *Org. Lett.*, **2015**, *17*, 4352-4355.
- [14] Piontek, A.; Ochędzan-Siodłak, W.; Bisz, E.; Zostak, M. S. Nickel-Catalyzed C(sp<sup>2</sup>)-C(sp<sup>3</sup>) Kumada Cross-Coupling of Aryl Tosylates with Alkyl Grignard Reagents. *Adv. Synth. Catal.*, **2019**, *361*, 2329 - 2336.
- [15] Luoni, G.; McGuigan, C.; Andrei, G.; Snoeck, R.; Clercq, E. D.; Balzarini, J. Bicyclic nucleoside inhibitors of Varicella-Zoster virus: The effect of branching in the *p*-alkylphenyl side chain. *Bioorg. Med. Chem. Lett.*, **2005**, *15*, 3791-3796.
- [16] Mills, L. R.; Monteith, J. J.; Gomes, G. dos P.; Aspuru-Guzik, A.; Rousseaux, S. A. L.; The Cyclopropane Ring as a Reporter of Radical Leaving-Group Reactivity for Ni-Catalyzed C(sp<sup>3</sup>)-O Arylation. *J. Am. Chem. Soc.*, **2020**, *142*, 13246-13254.
- [17] Khalaf, Ali A.; Awad, I. M.; El-Emary, T. I.; Abd El-Aal, H. A. K. Friedel-Crafts alkylation of benzene with 1,2-diphenyl-2-propanol, 1-chloro-2,3-diphenylpropane, and 2-methyl-1-phenyl-2-butanol. *Journal of the Indian Chemical Society*, **2010**, *87*, 595-600.
- [18] Gawron, M.; Gilch, F.; Schmidhuber, D.; Kelly, J. A.; Downie, T. M. H.; Wangelin, A. J.; Rehbein, J.; Wolf, R. Counterion Effect in Cobaltate-Catalyzed Alkene Hydrogenation. *Angew. Chem. Int. Ed.*, **2024**, *63*, e202315381.
- [19] Visser, P.; Feringa, B. L. Organogelation enables fast organolithium cross-coupling reactions in air. *Chem. Commun.*, **2023**, *59*, 5539-5542.
- [20] Zhang, Xu.; Qin, L. A General Procedure for the Construction of 2-Alkyl-Substituted Vinyl Sulfonyl Fluoride. *Org. Lett.*, **2022**, *24*, 9311-9315.

## 7. NMR spectral data for compounds

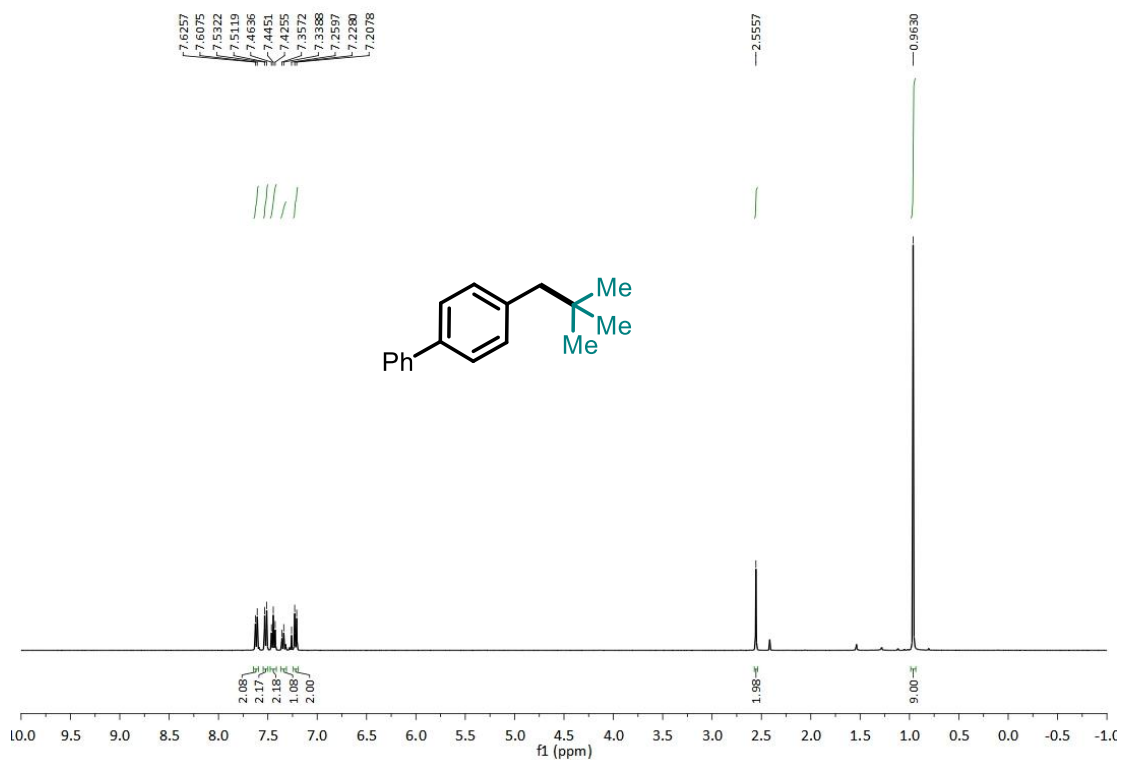

<sup>1</sup>H NMR (400 MHz, CDCl<sub>3</sub>) spectrum of compound **3**

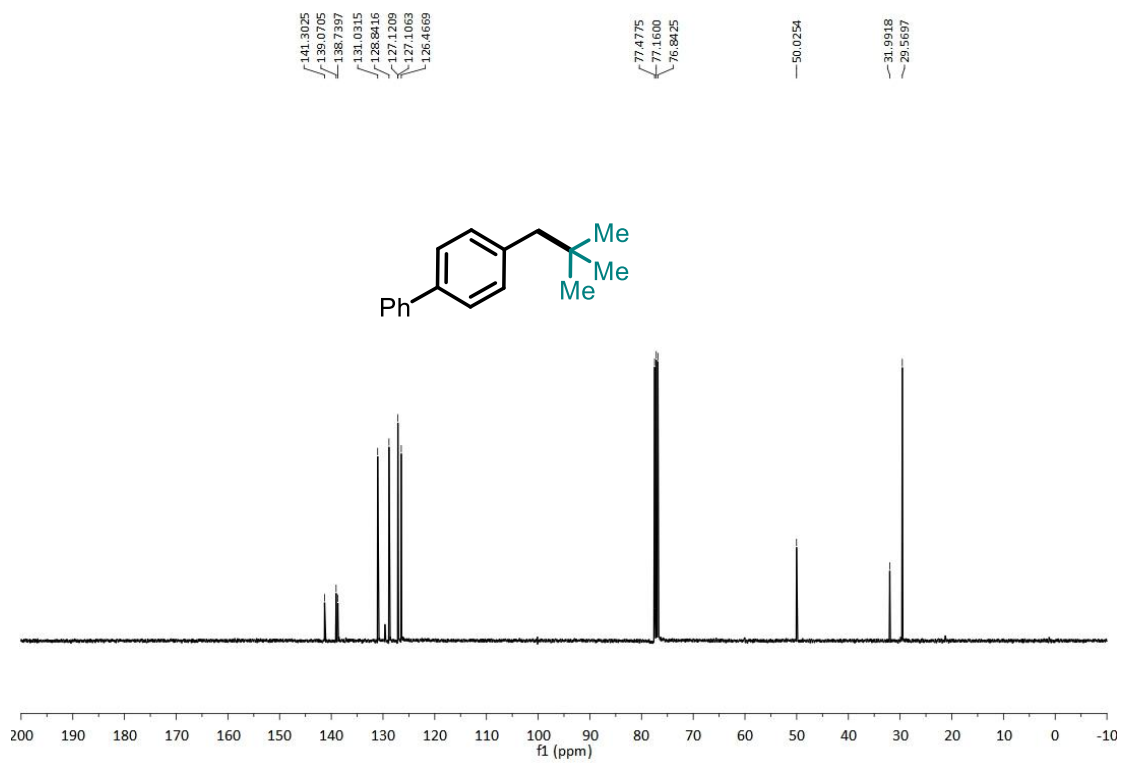

<sup>13</sup>C NMR (100 MHz, CDCl<sub>3</sub>) spectrum of compound **3**

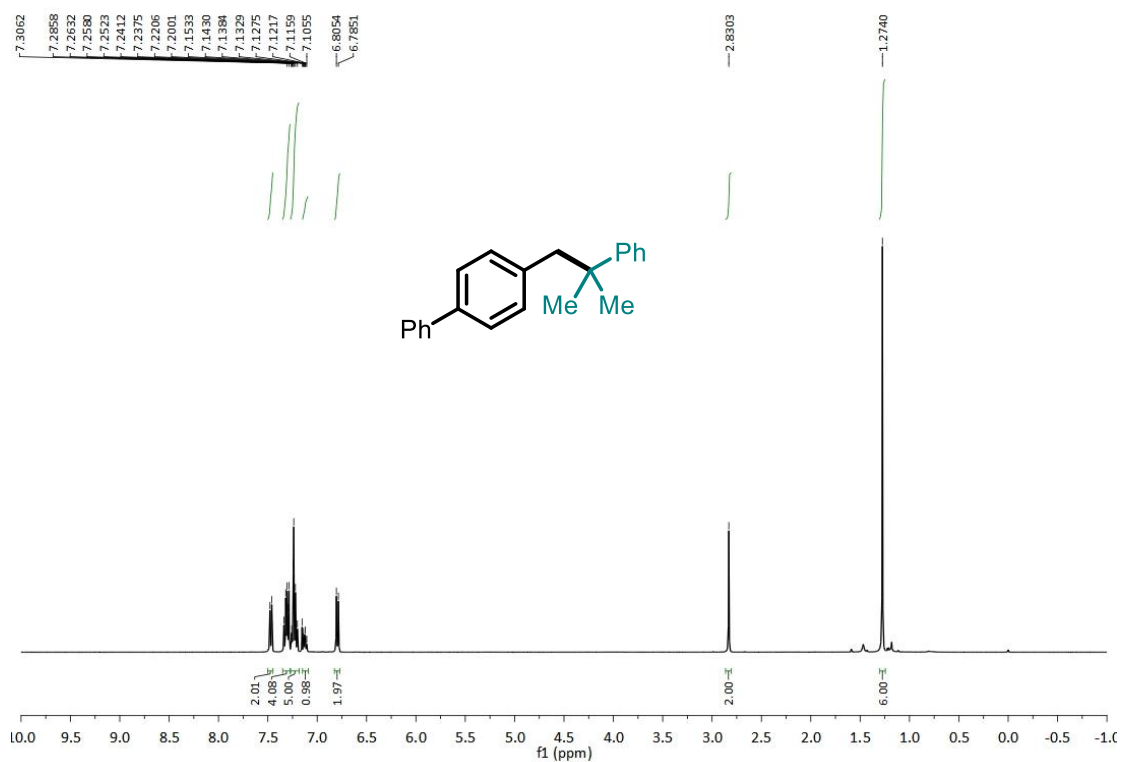

<sup>1</sup>H NMR (400 MHz, CDCl<sub>3</sub>) spectrum of compound **4**

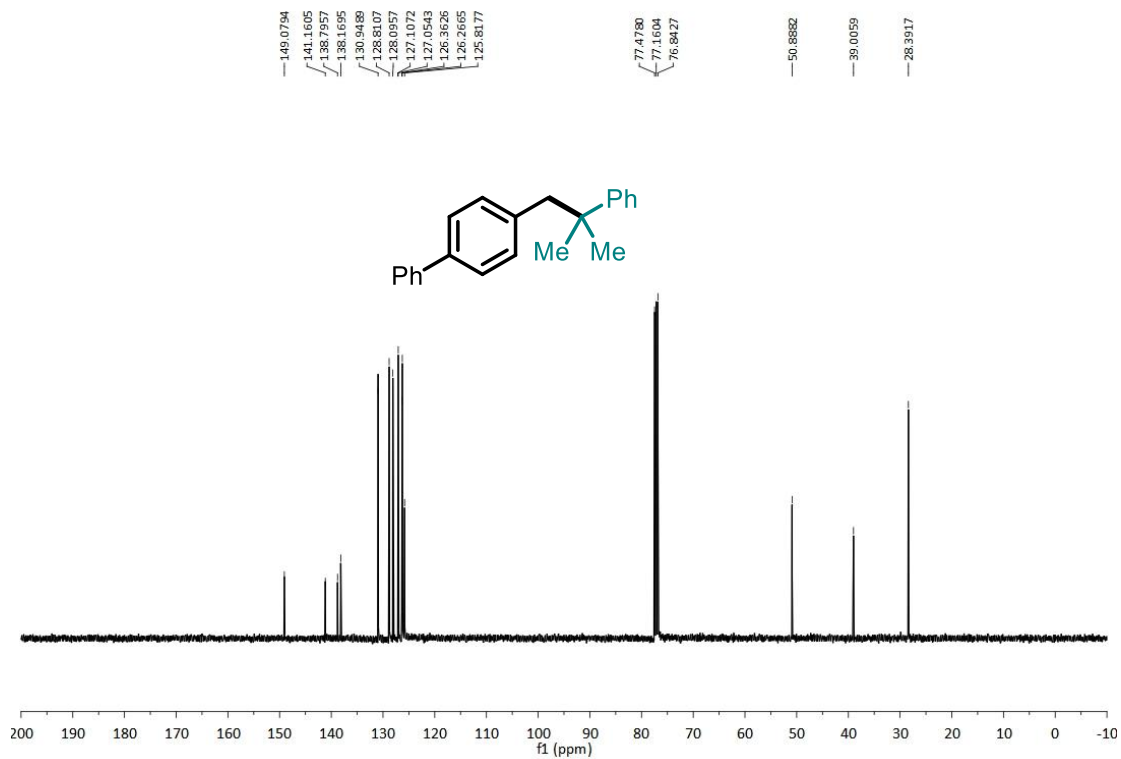

<sup>13</sup>C NMR (100 MHz, CDCl<sub>3</sub>) spectrum of compound **4**

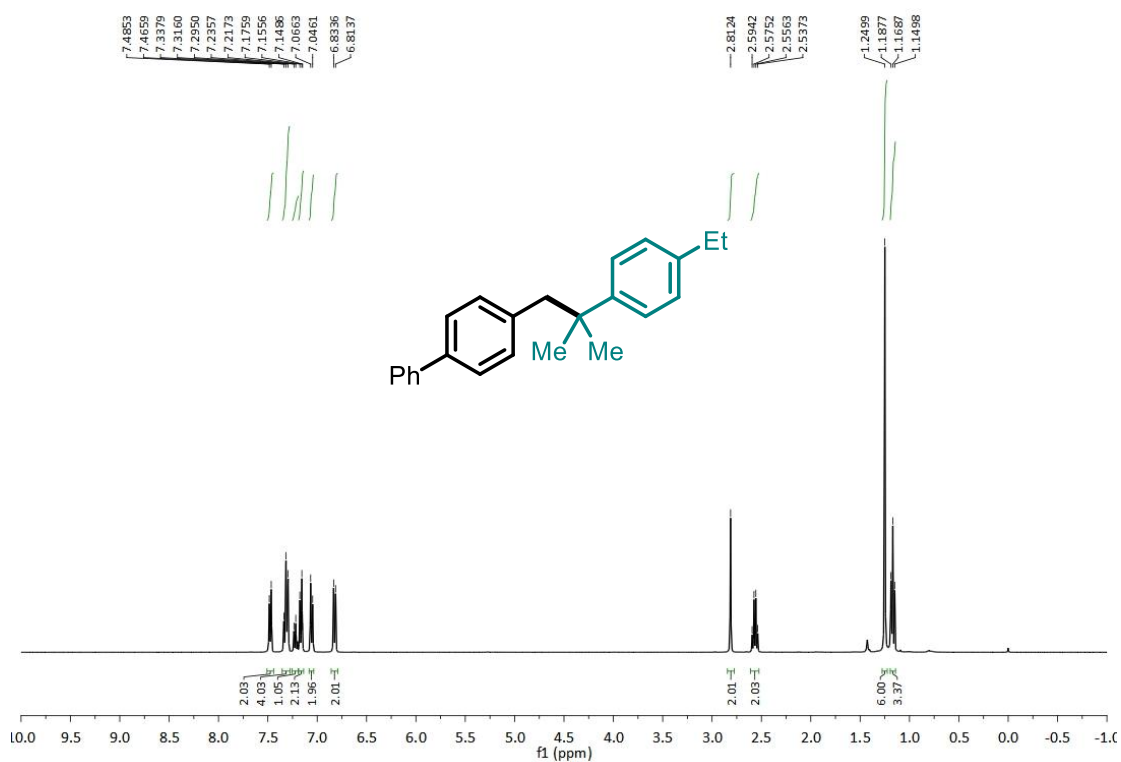

<sup>1</sup>H NMR (400 MHz, CDCl<sub>3</sub>) spectrum of compound **5**

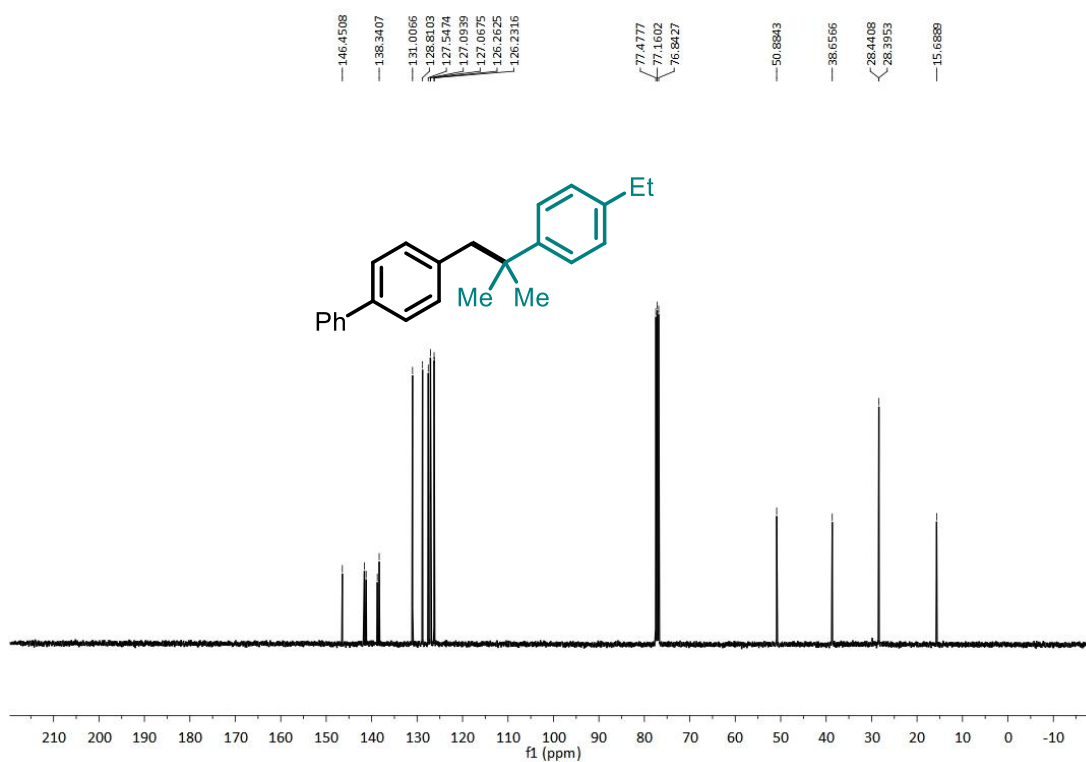

<sup>13</sup>C NMR (100 MHz, CDCl<sub>3</sub>) spectrum of compound **5**

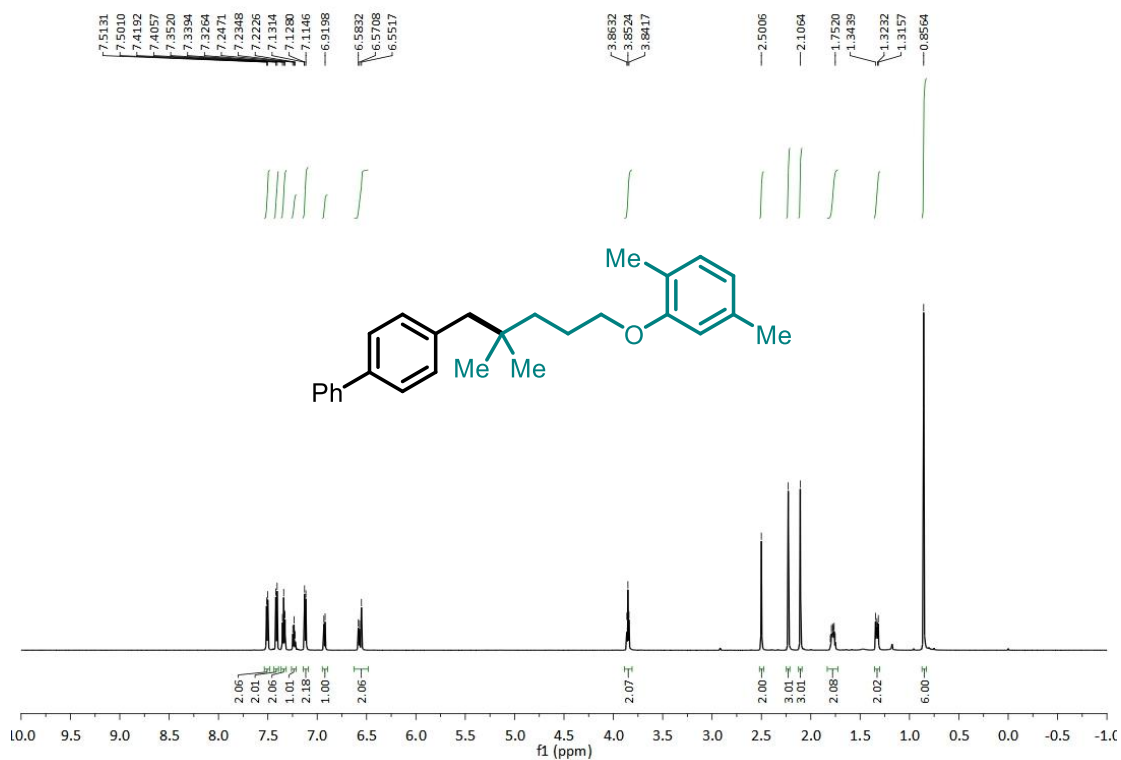

<sup>1</sup>H NMR (400 MHz, CDCl<sub>3</sub>) spectrum of compound **6**

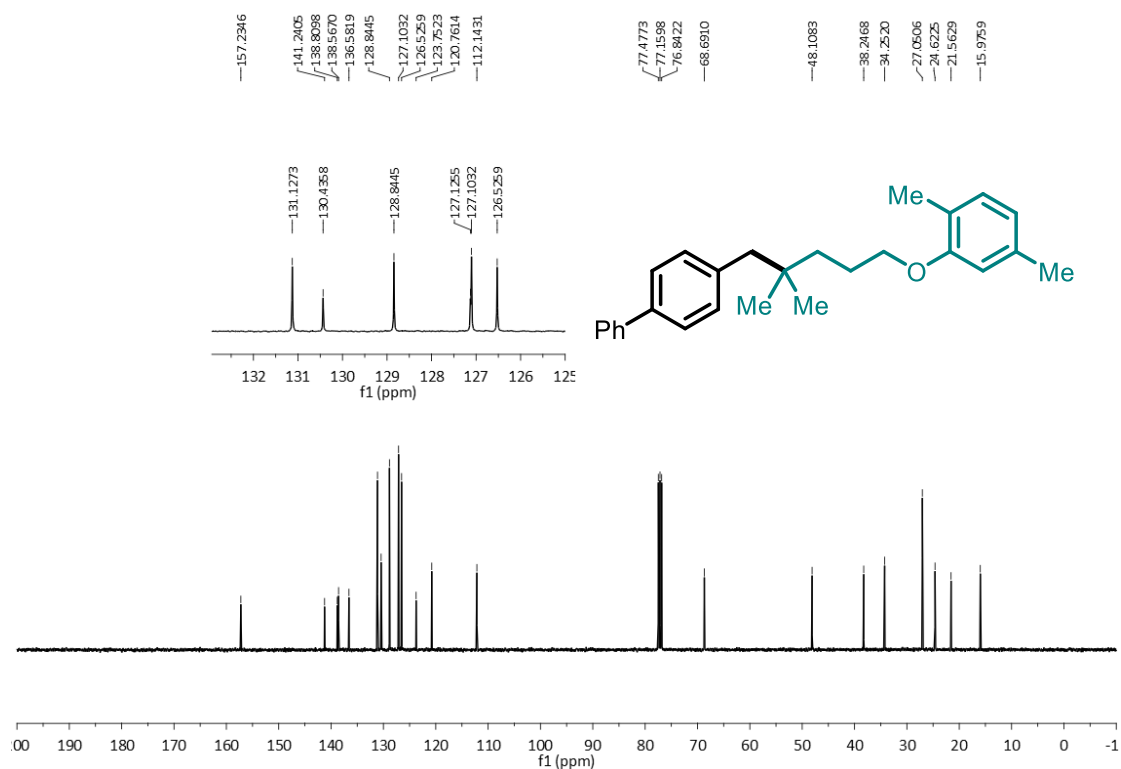

<sup>13</sup>C NMR (100 MHz, CDCl<sub>3</sub>) spectrum of compound **6**

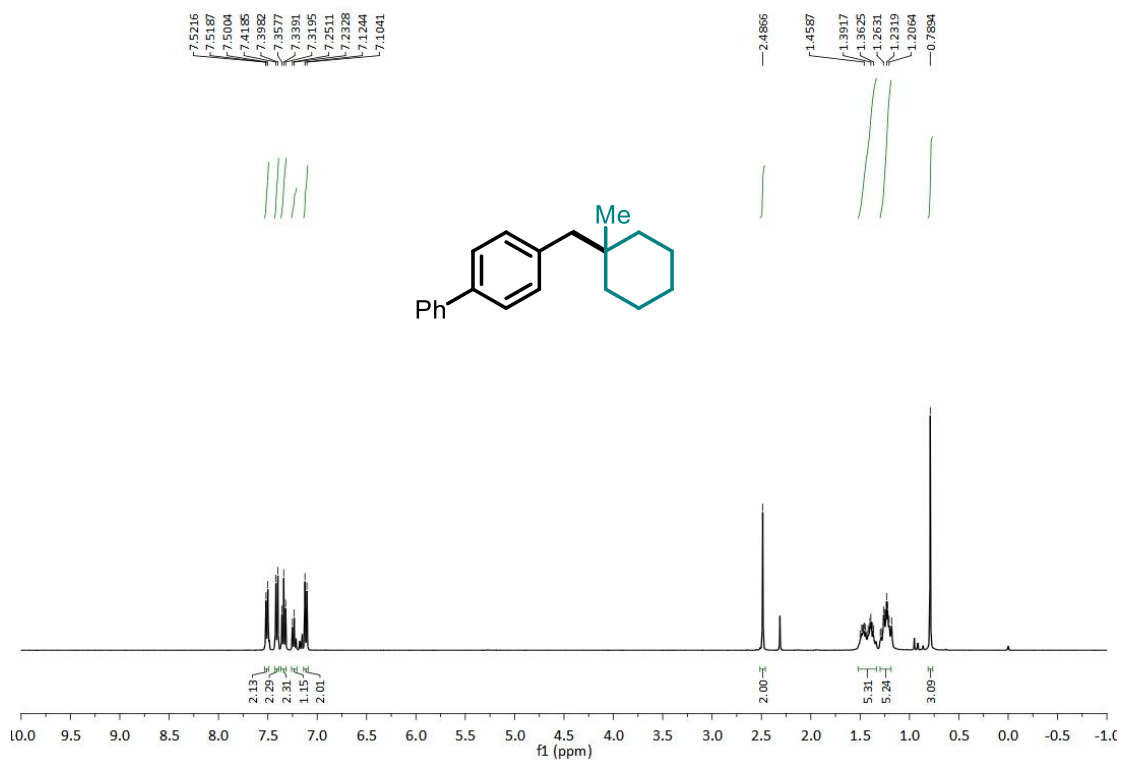

<sup>1</sup>H NMR (400 MHz, CDCl<sub>3</sub>) spectrum of compound **7**

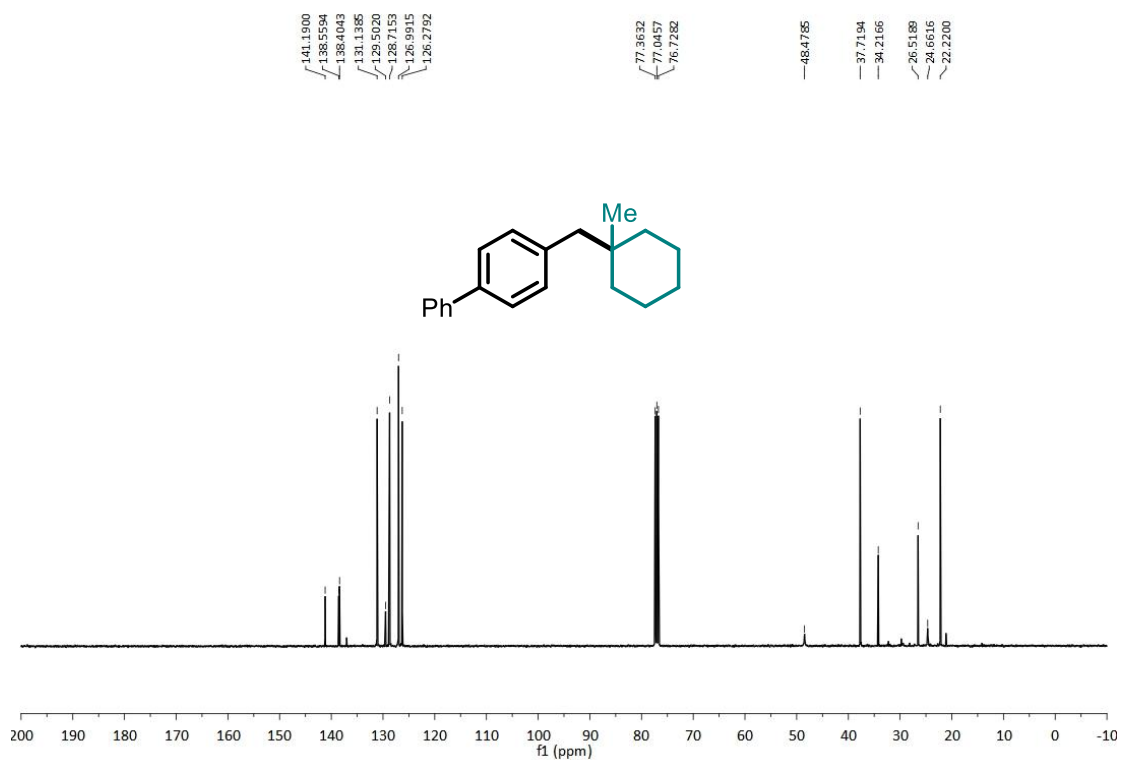

<sup>13</sup>C NMR (100 MHz, CDCl<sub>3</sub>) spectrum of compound **7**

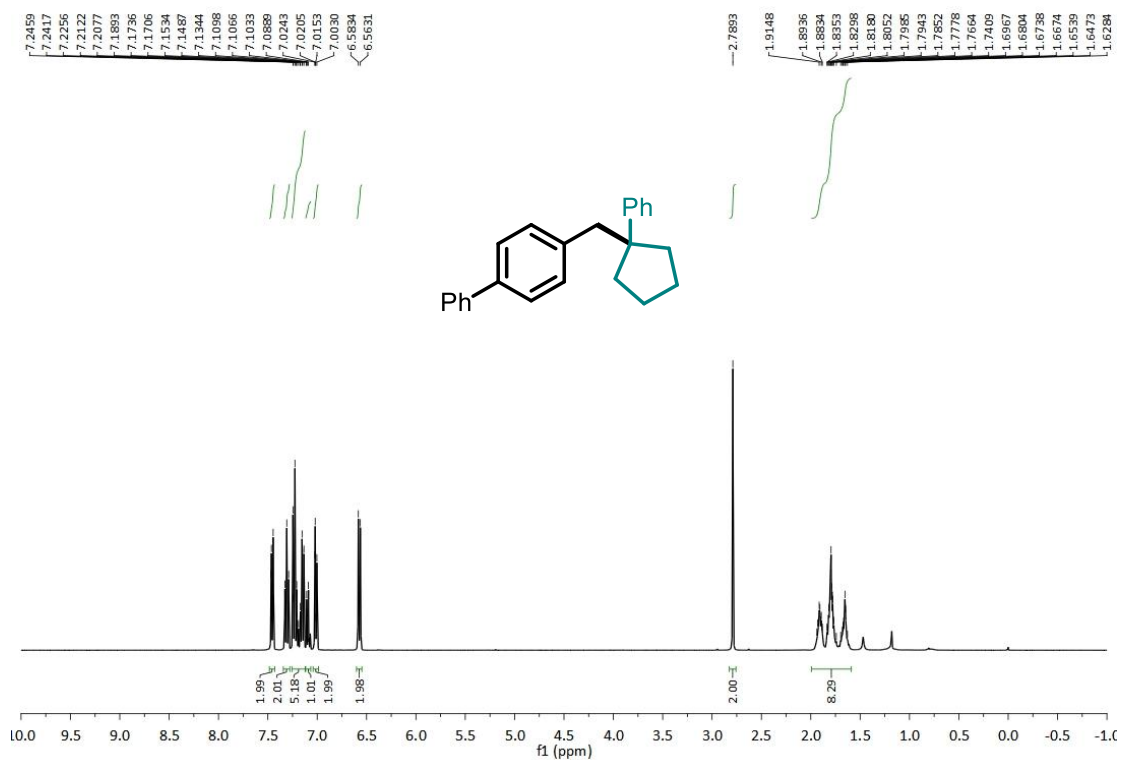

<sup>1</sup>H NMR (400 MHz, CDCl<sub>3</sub>) spectrum of compound **8**

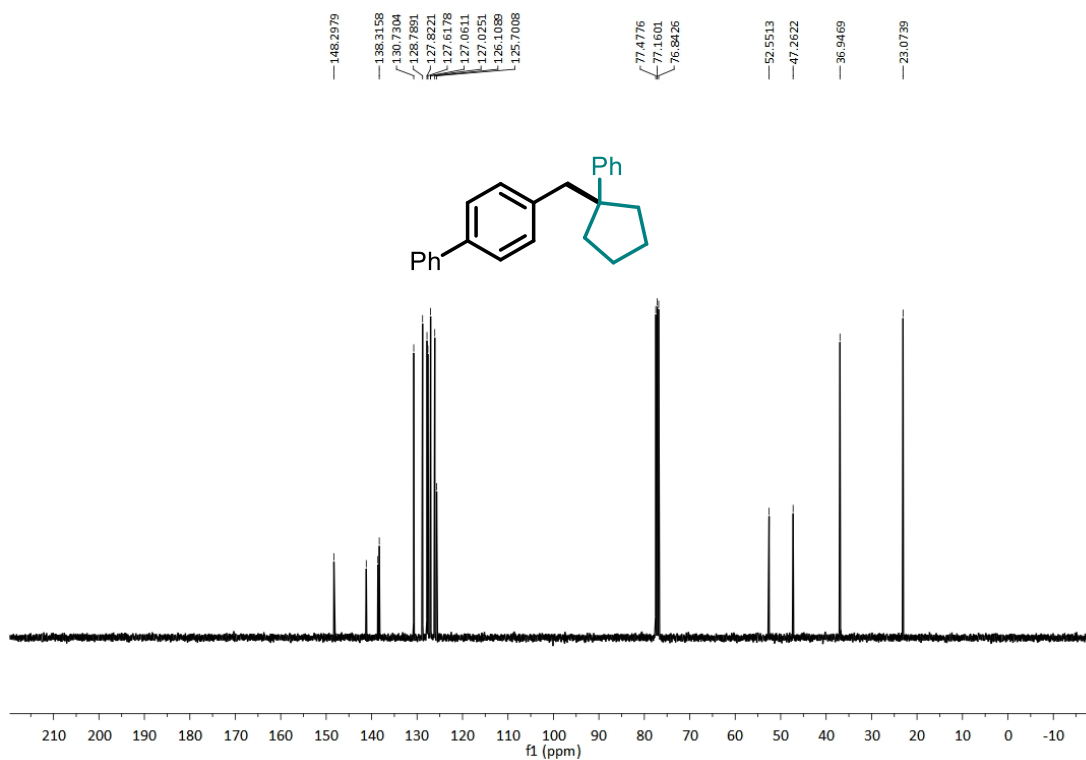

<sup>13</sup>C NMR (100 MHz, CDCl<sub>3</sub>) spectrum of compound **8**

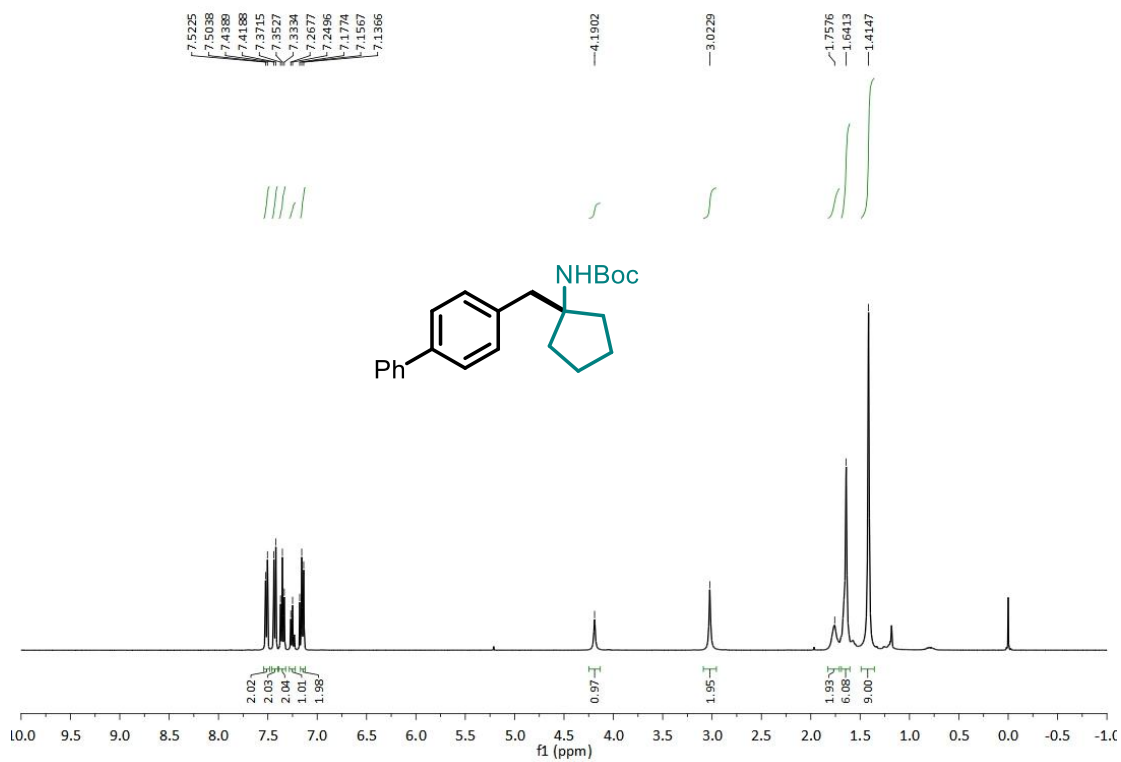

<sup>1</sup>H NMR (400 MHz, CDCl<sub>3</sub>) spectrum of compound **9**

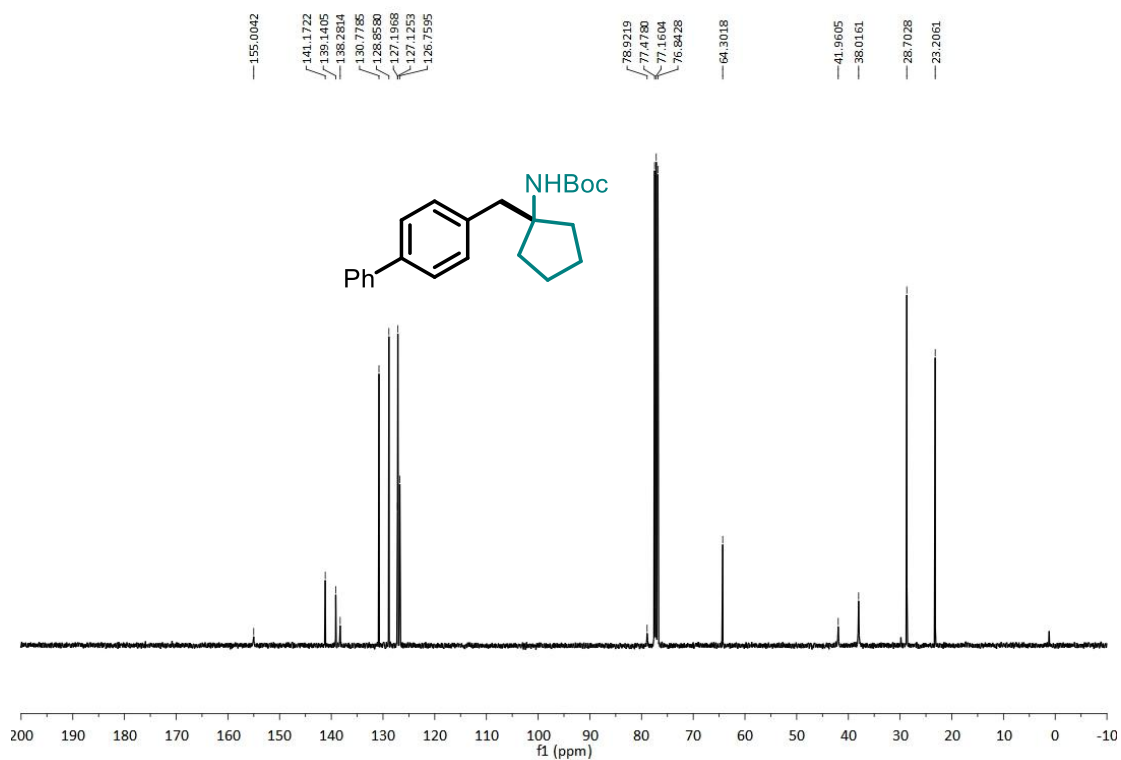

<sup>13</sup>C NMR (100 MHz, CDCl<sub>3</sub>) spectrum of compound **9**

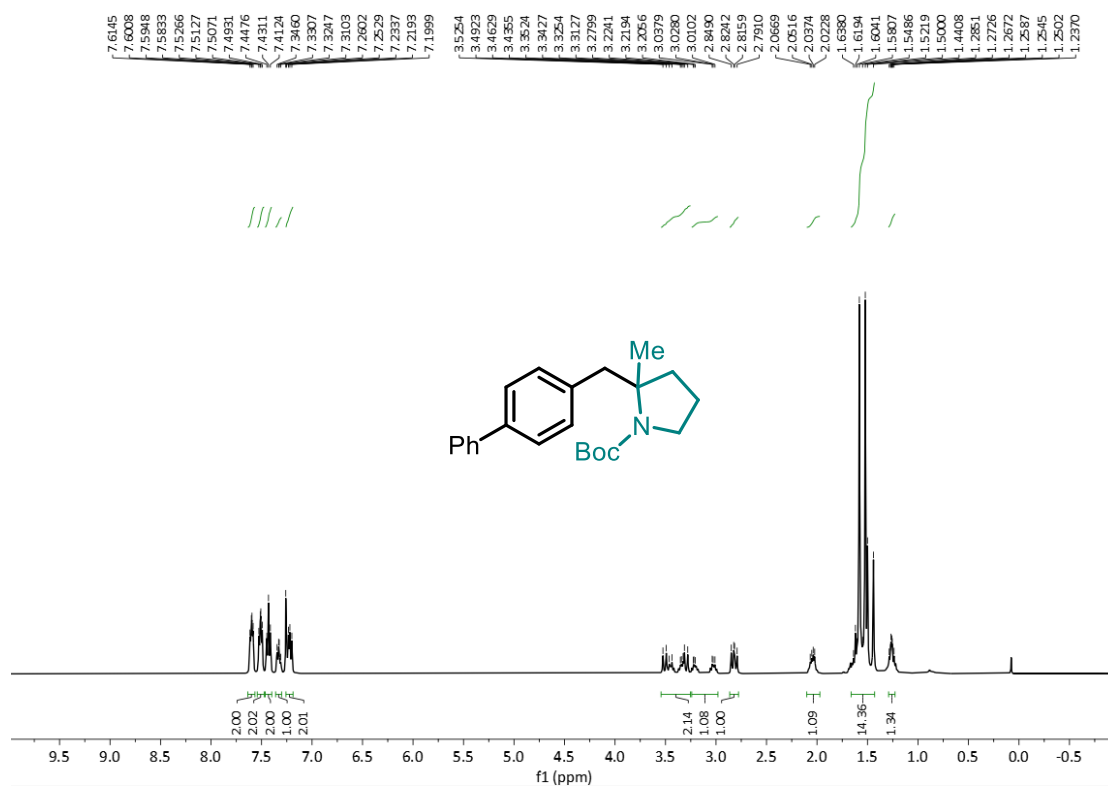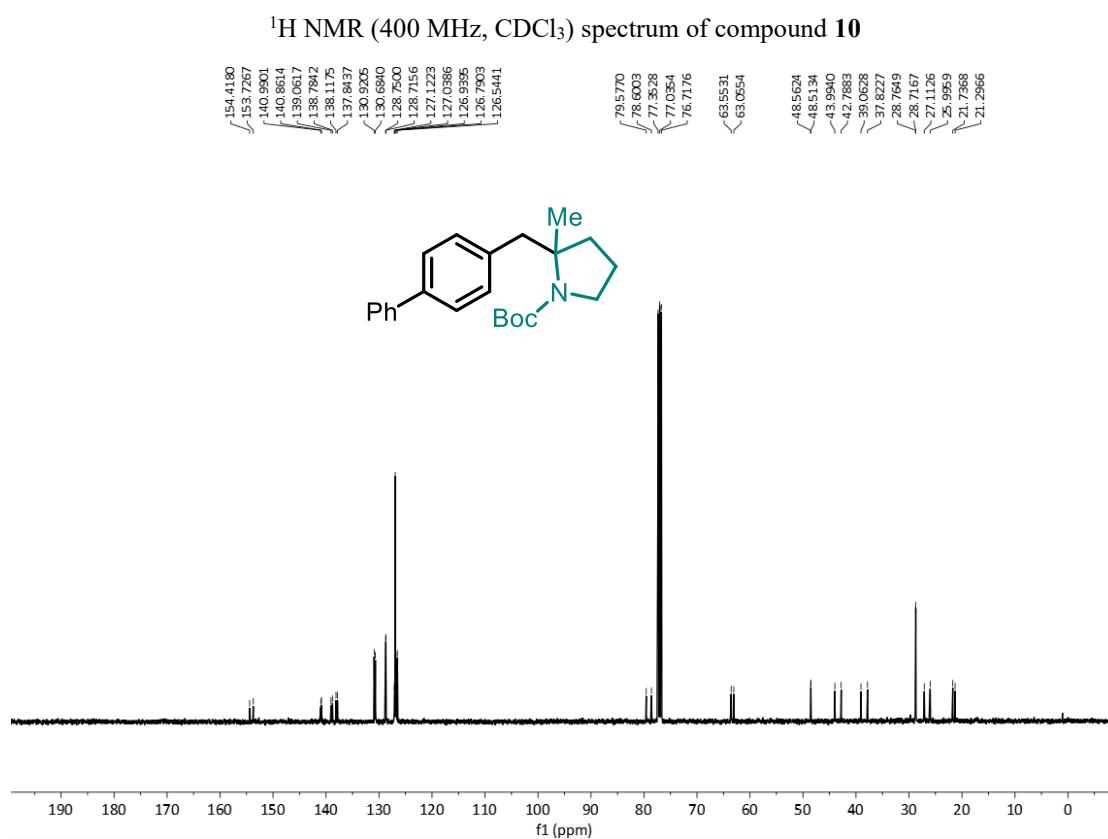

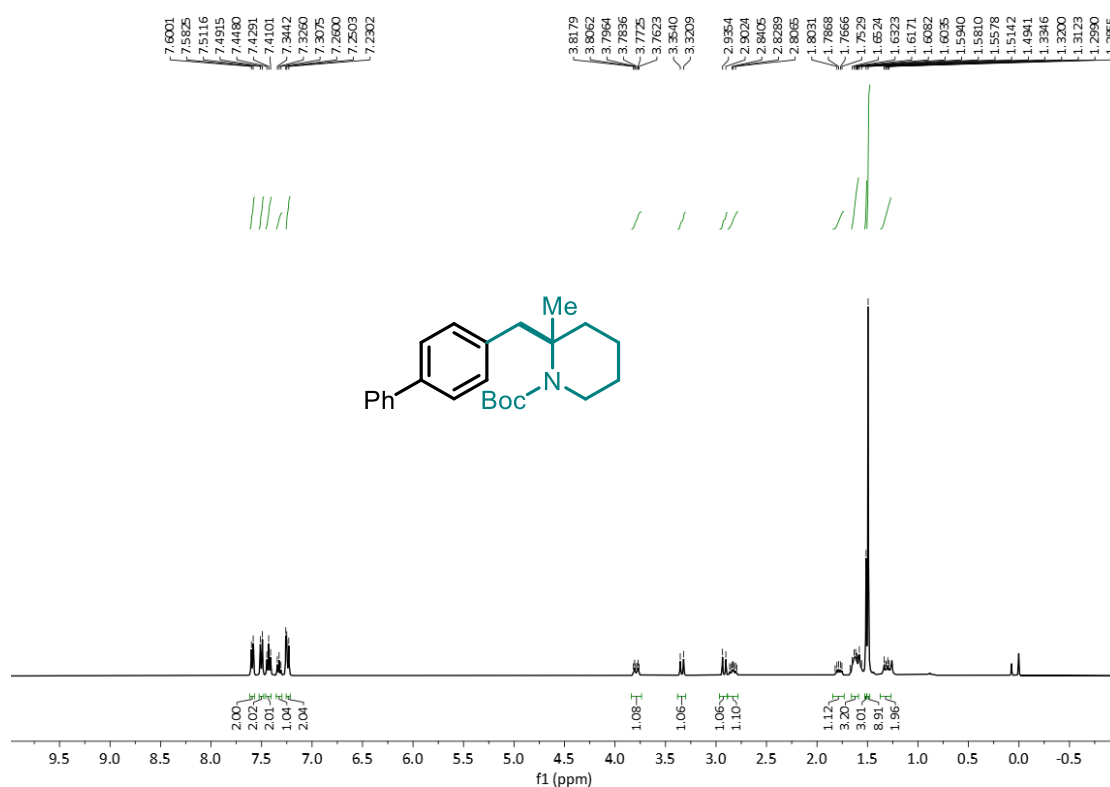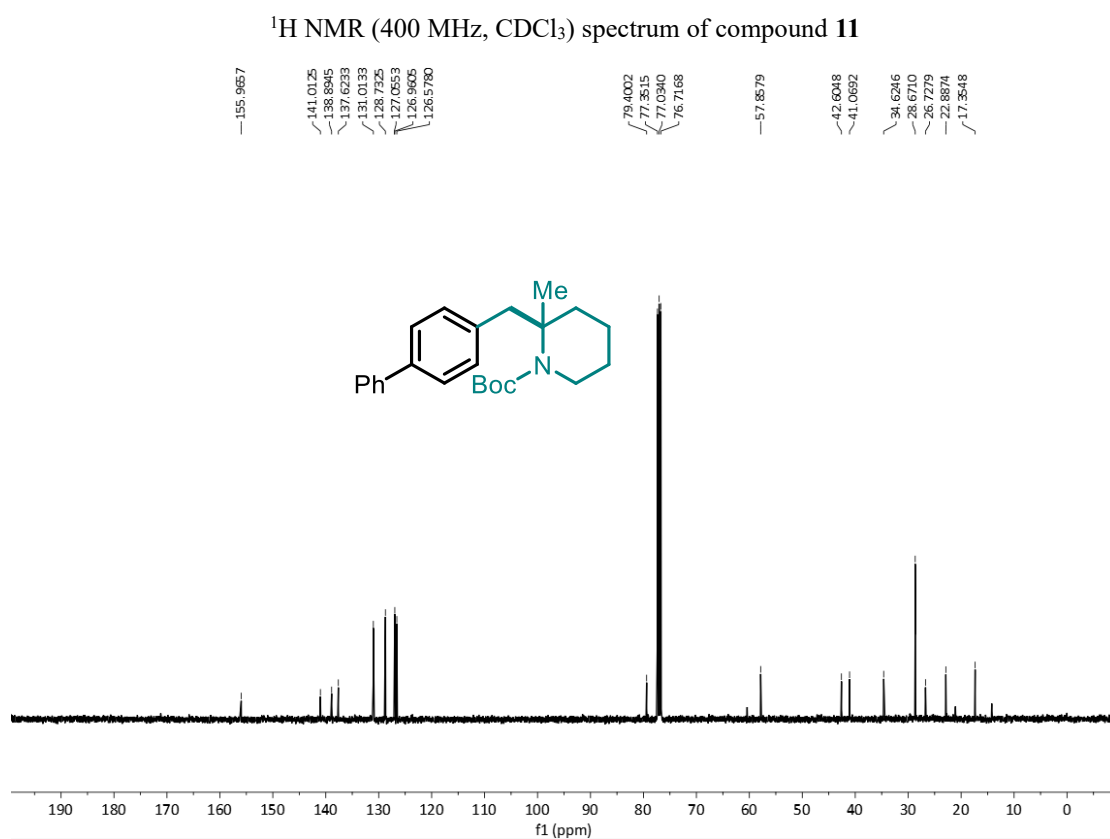

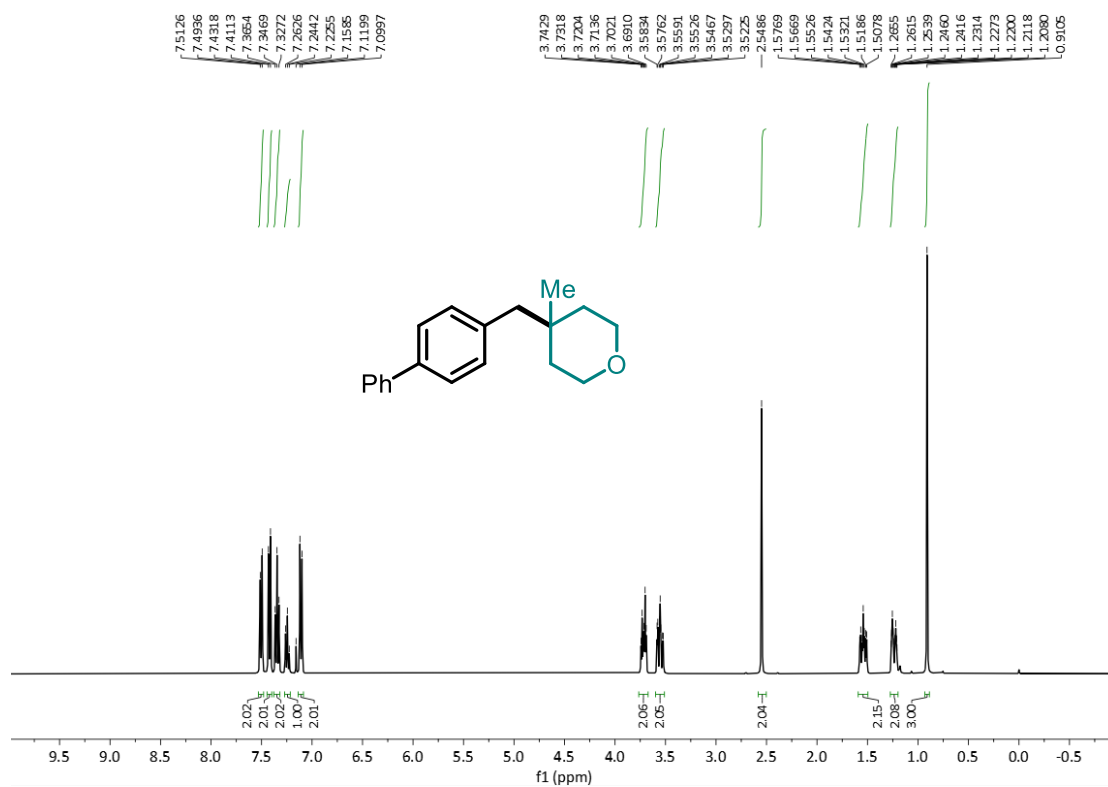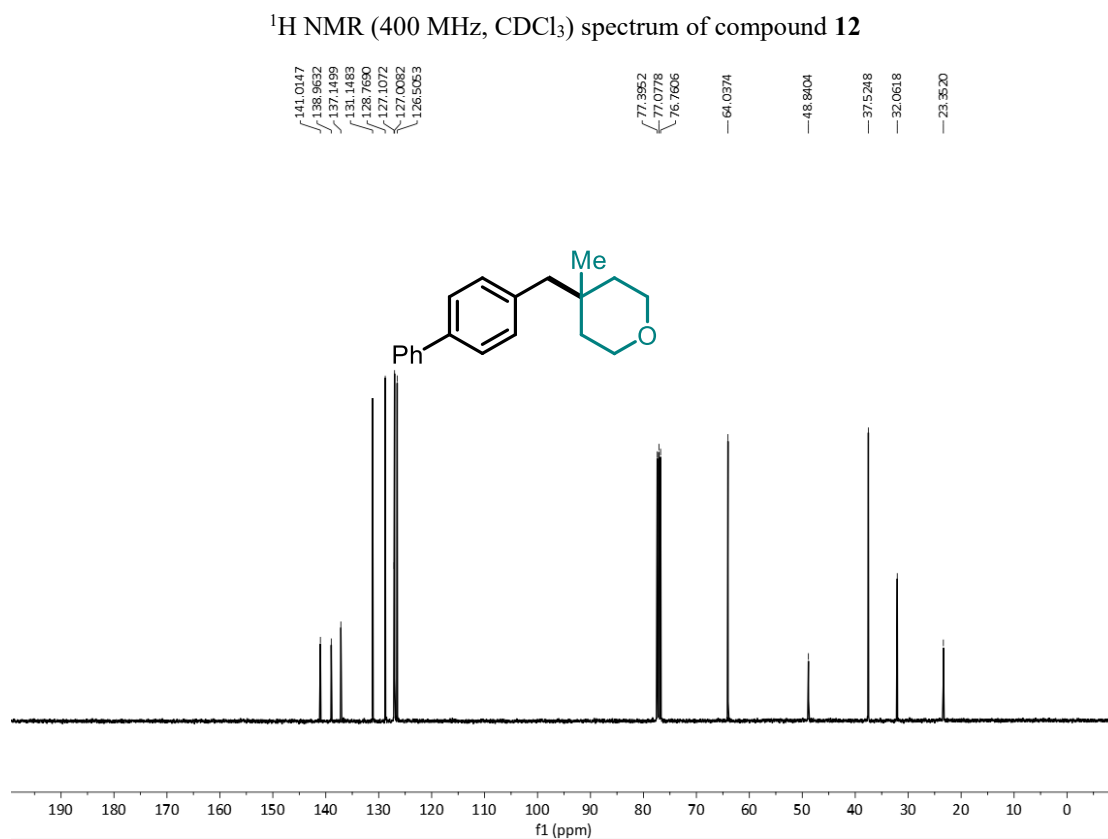

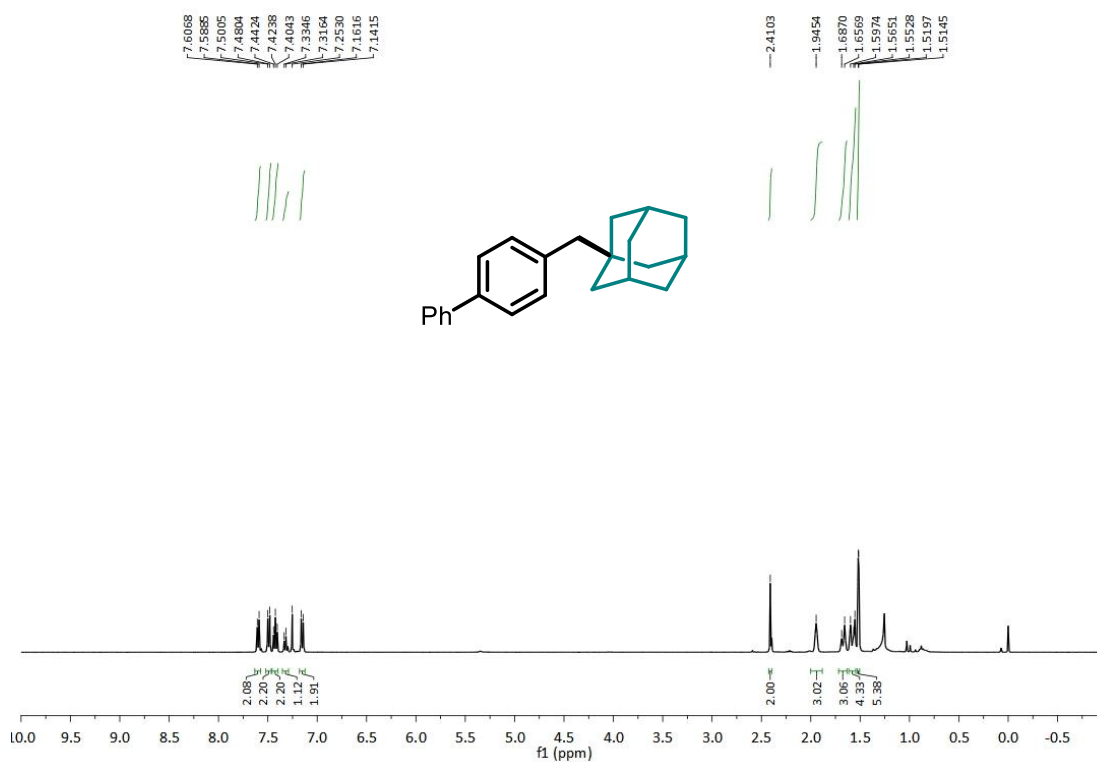

<sup>1</sup>H NMR (400 MHz, CDCl<sub>3</sub>) spectrum of compound **13**

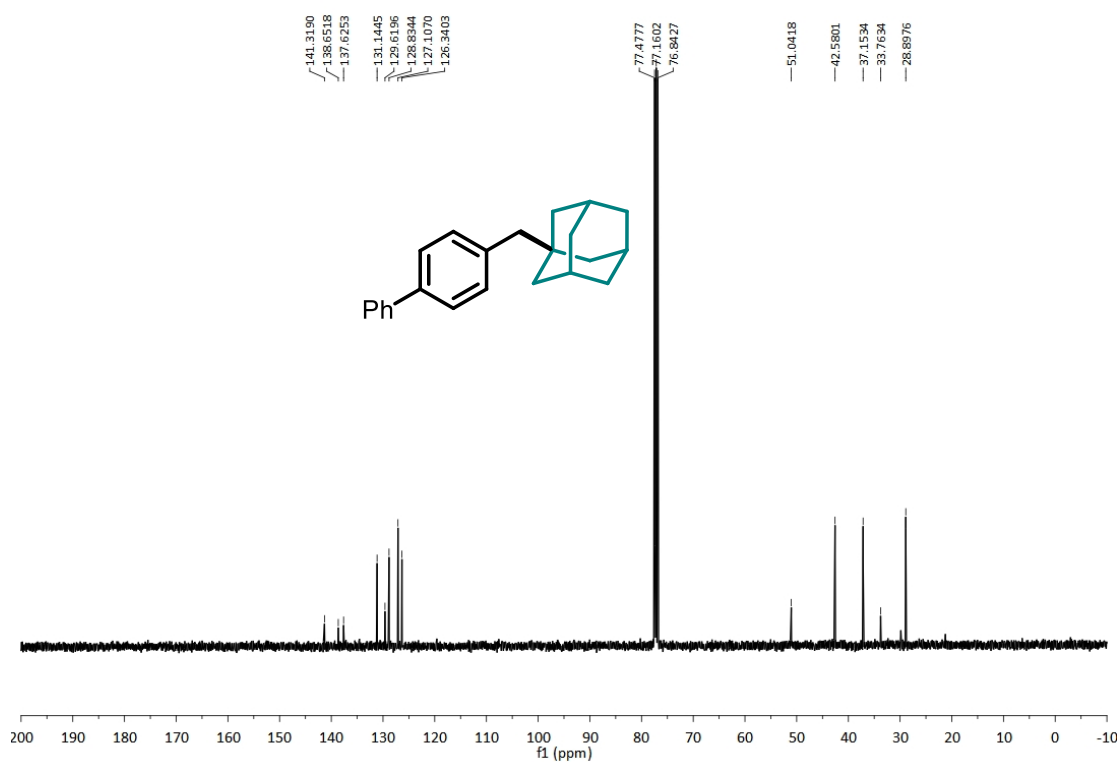

<sup>13</sup>C NMR (100 MHz, CDCl<sub>3</sub>) spectrum of compound **13**

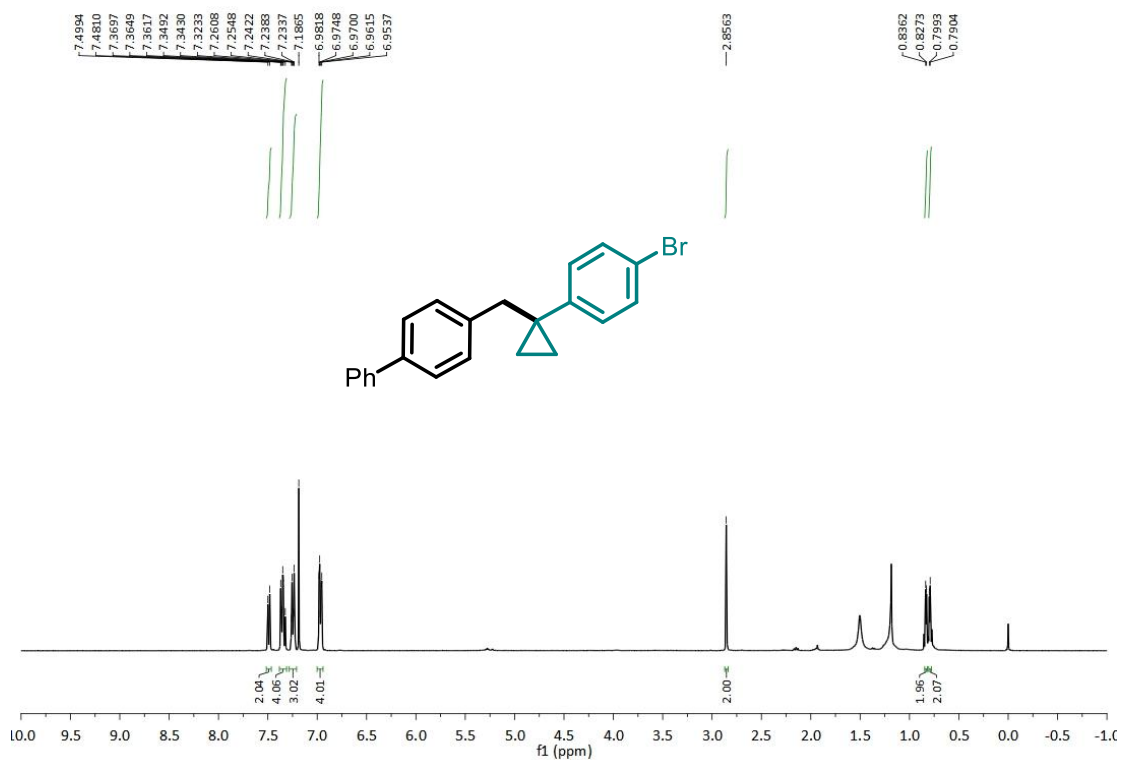

<sup>1</sup>H NMR (400 MHz, CDCl<sub>3</sub>) spectrum of compound **14**

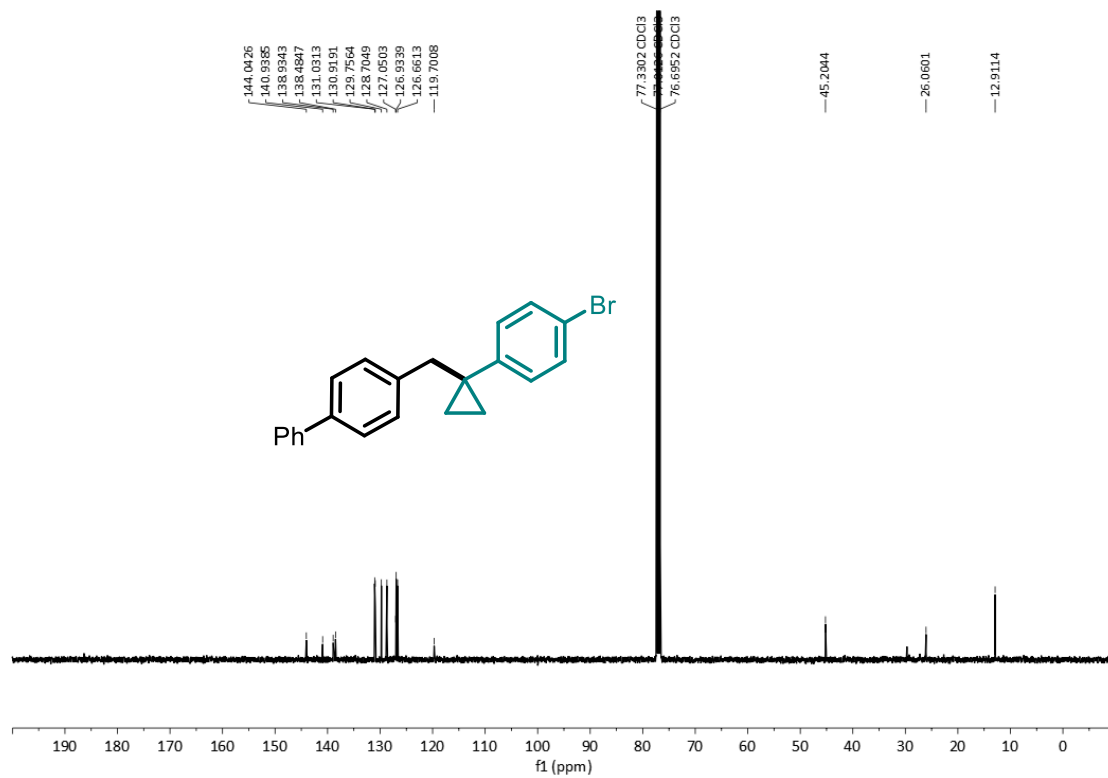

<sup>13</sup>C NMR (100 MHz, CDCl<sub>3</sub>) spectrum of compound **14**

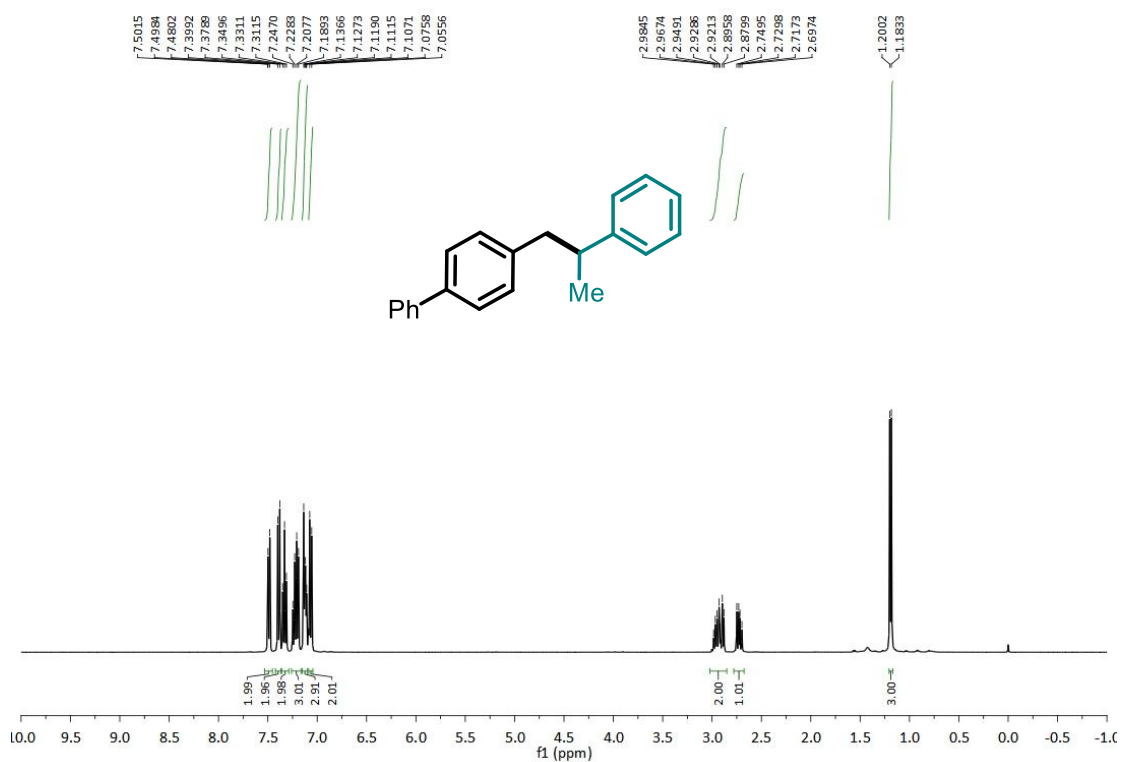

<sup>1</sup>H NMR (400 MHz, CDCl<sub>3</sub>) spectrum of compound **15**

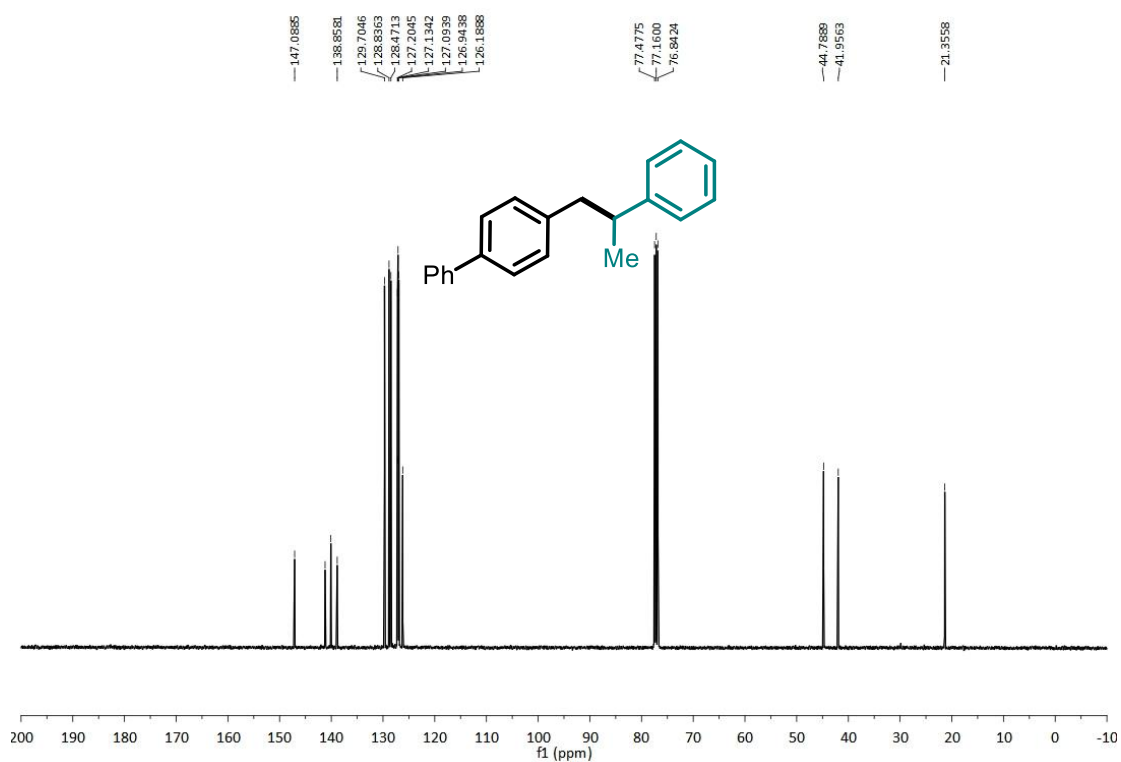

<sup>13</sup>C NMR (100 MHz, CDCl<sub>3</sub>) spectrum of compound **15**

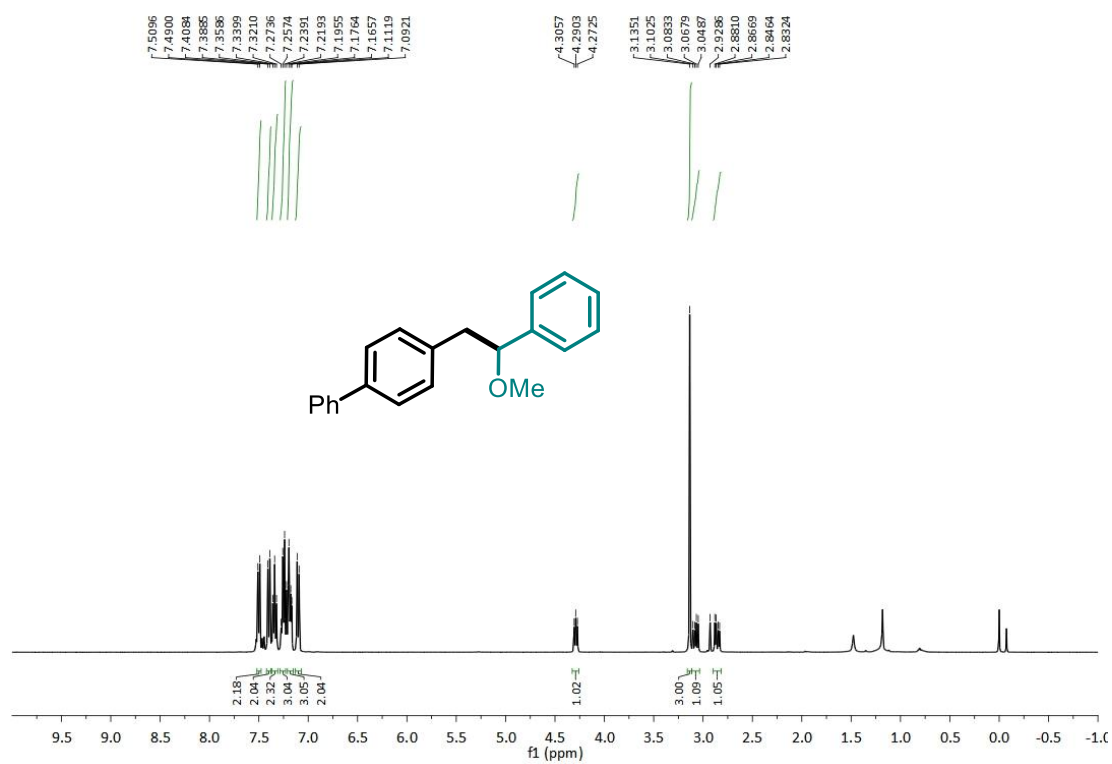

<sup>1</sup>H NMR (400 MHz, CDCl<sub>3</sub>) spectrum of compound **16**

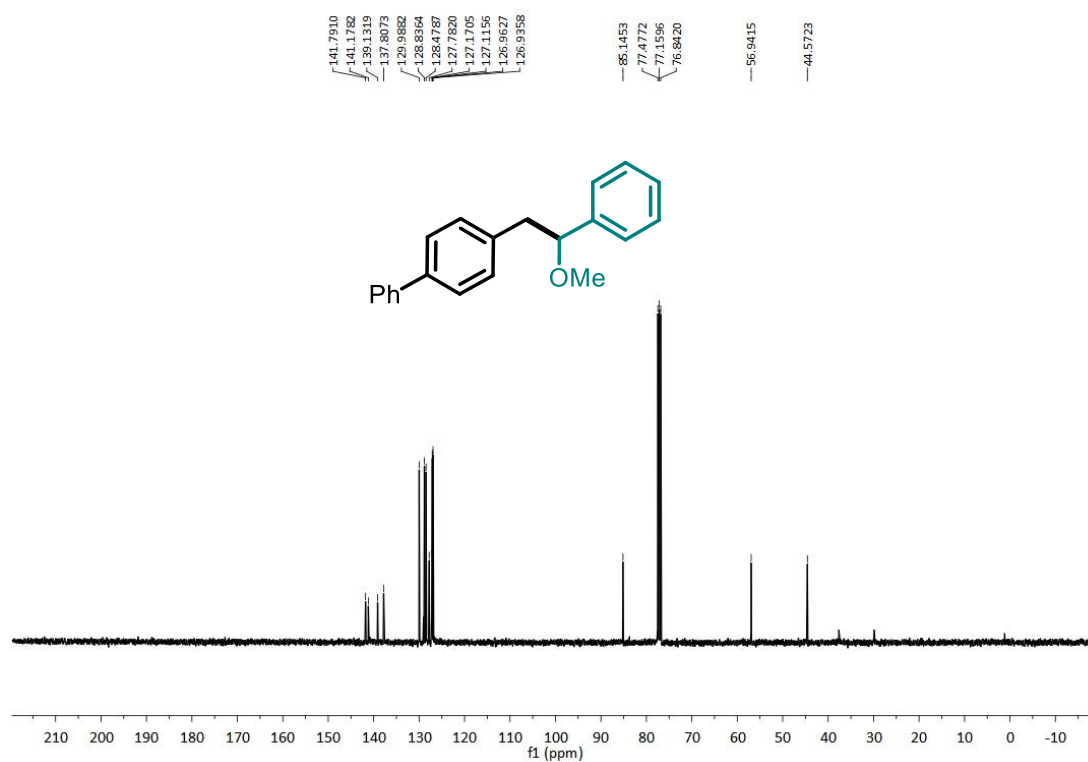

<sup>13</sup>C NMR (100 MHz, CDCl<sub>3</sub>) spectrum of compound **16**

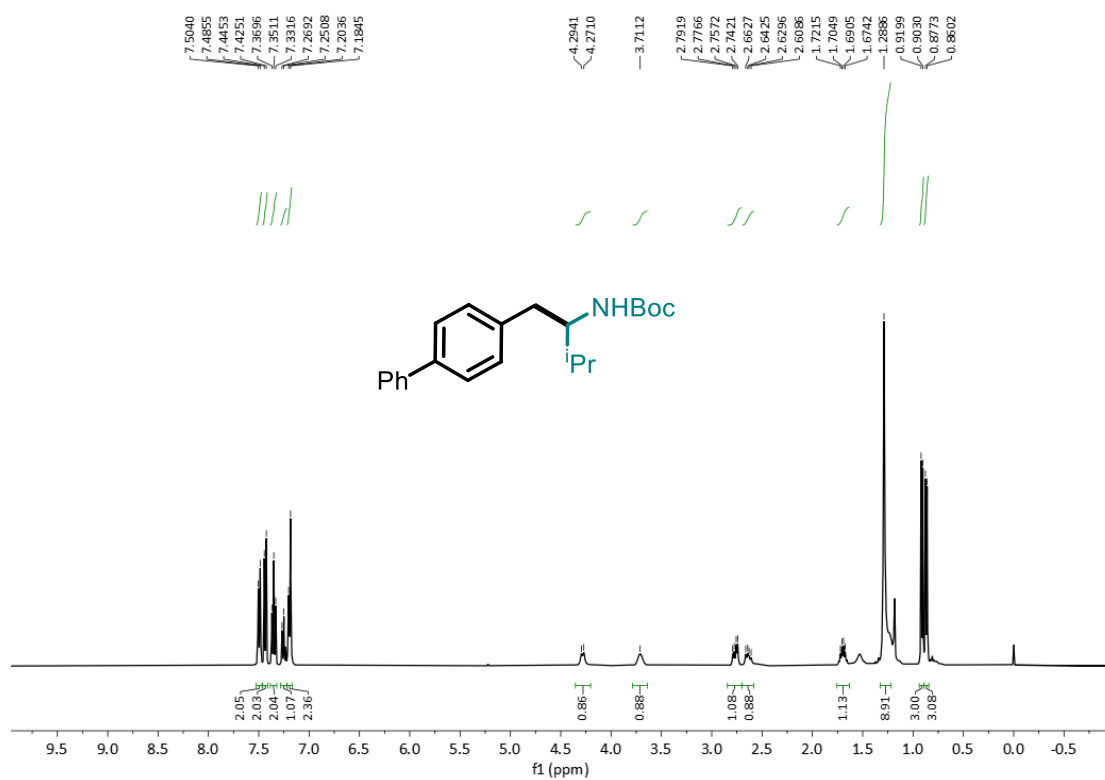

<sup>1</sup>H NMR (400 MHz, CDCl<sub>3</sub>) spectrum of compound 17

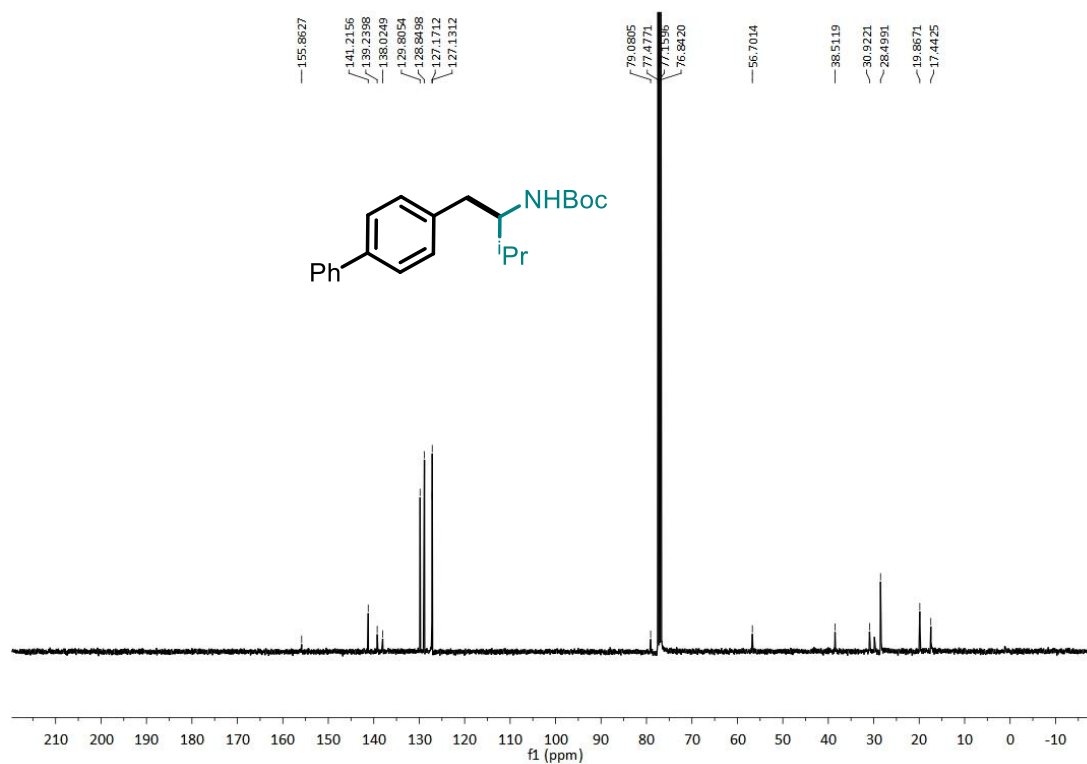

<sup>13</sup>C NMR (100 MHz, CDCl<sub>3</sub>) spectrum of compound 17

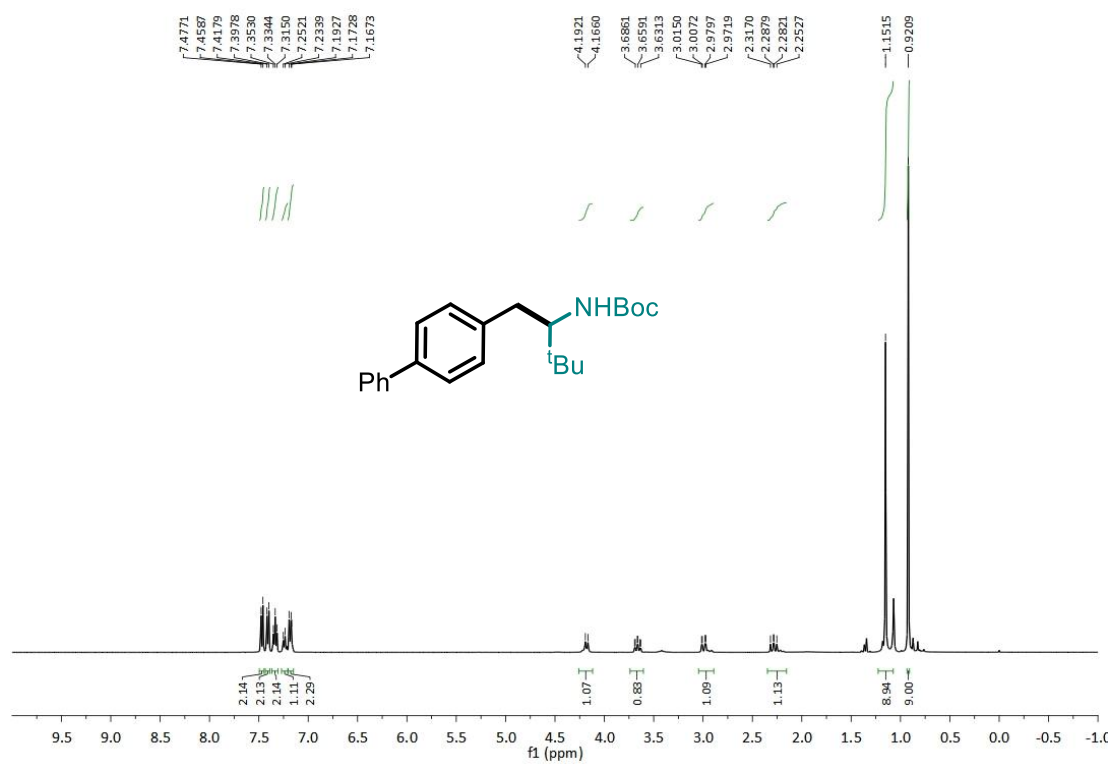

<sup>1</sup>H NMR (400 MHz, CDCl<sub>3</sub>) spectrum of compound **18**

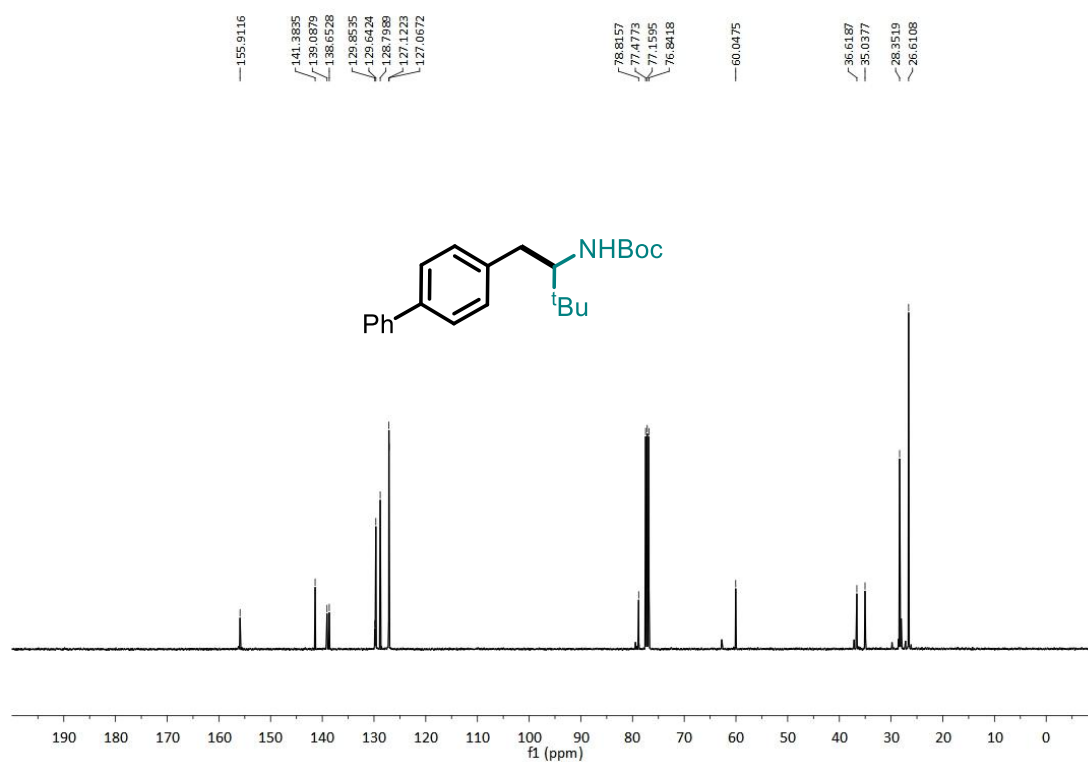

<sup>13</sup>C NMR (100 MHz, CDCl<sub>3</sub>) spectrum of compound **18**

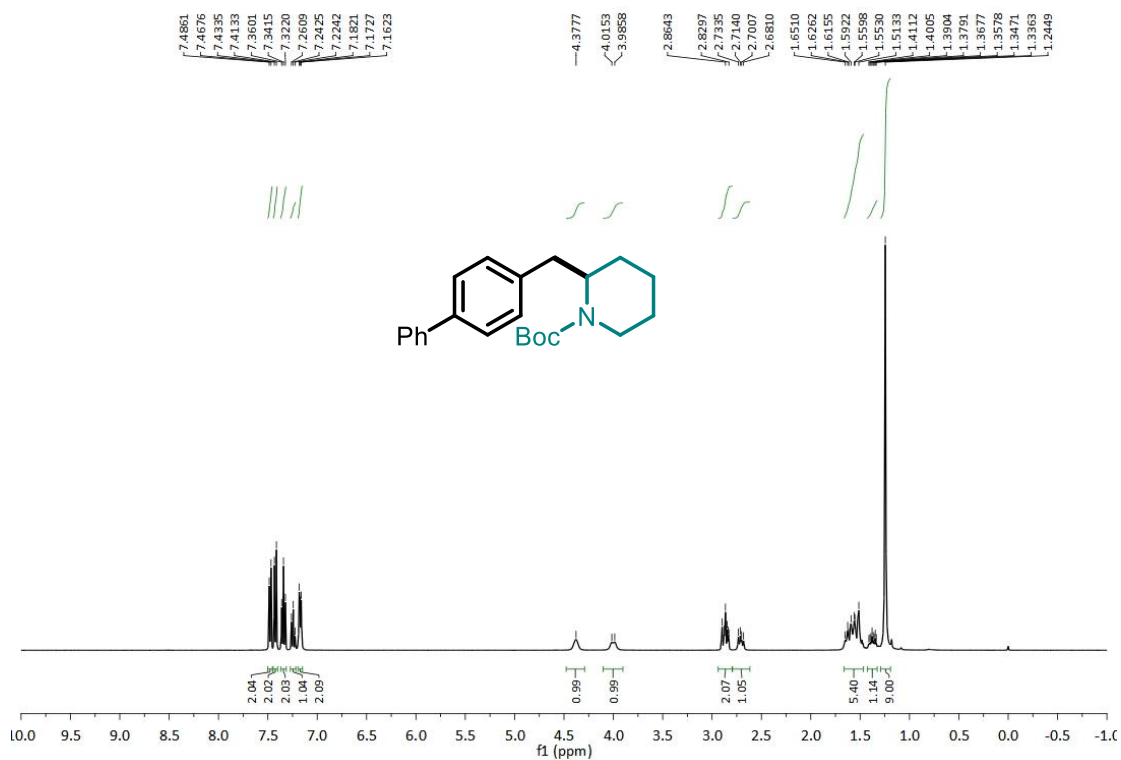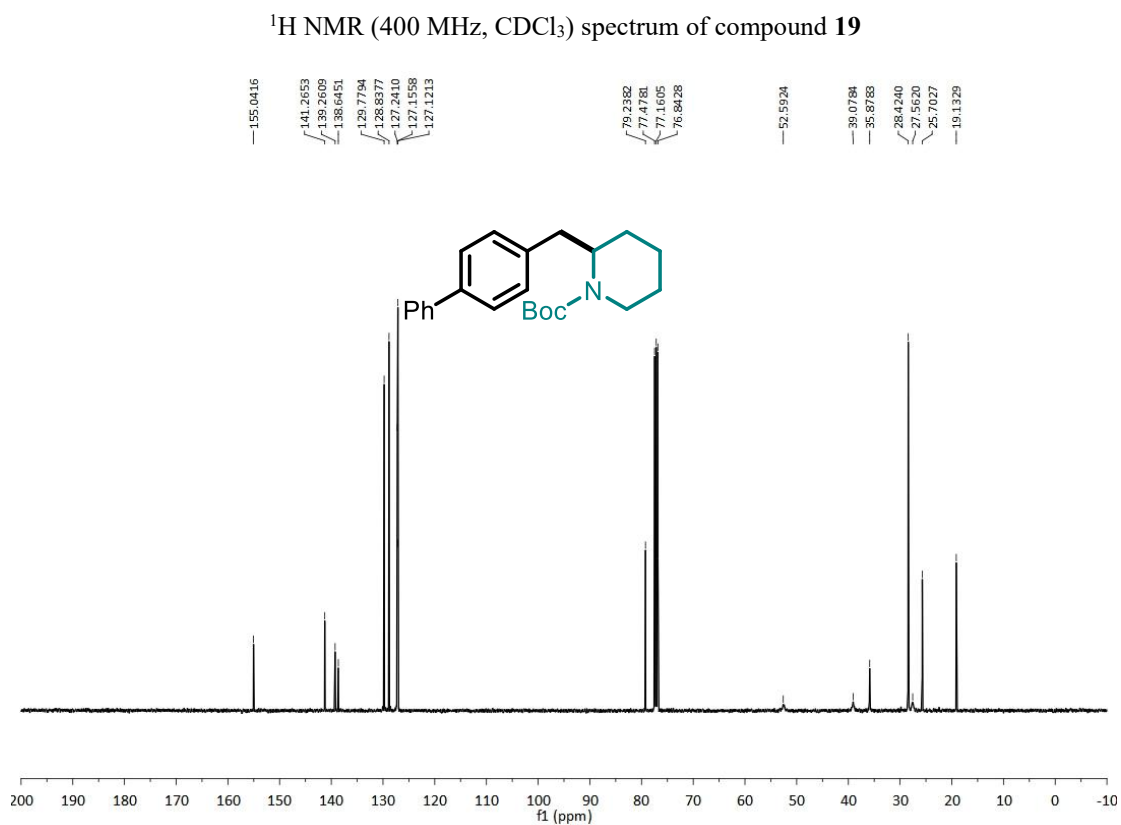

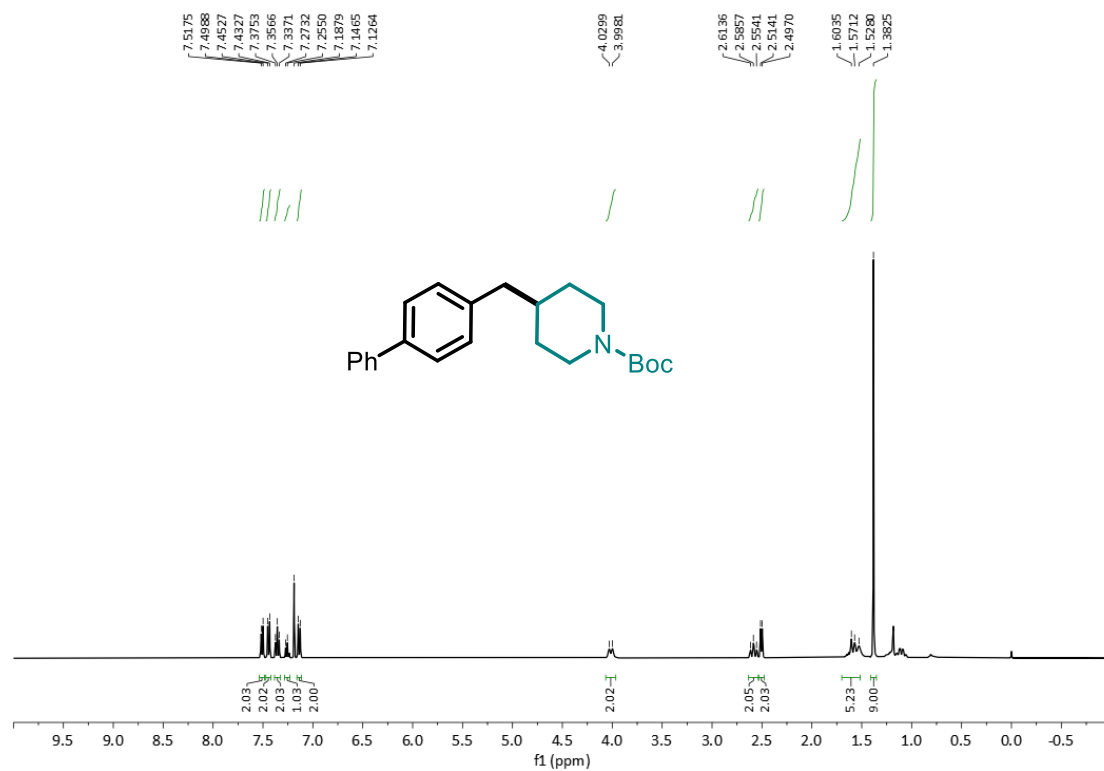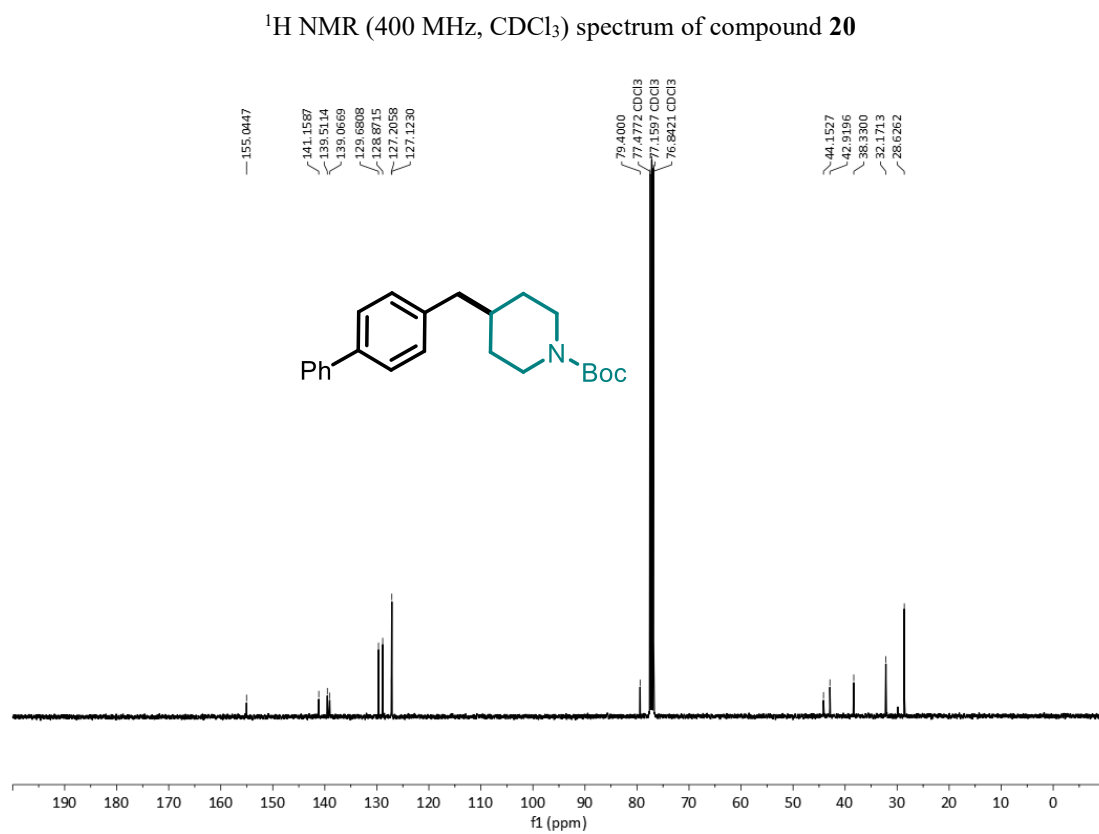

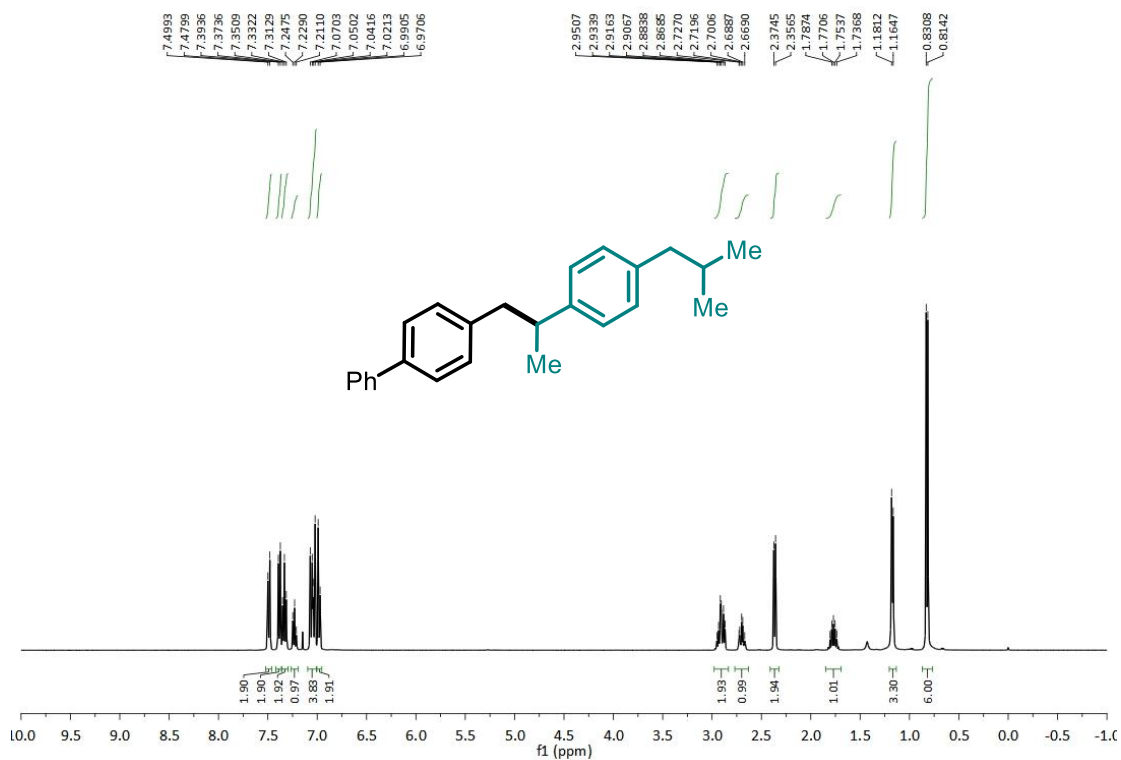

<sup>1</sup>H NMR (400 MHz, CDCl<sub>3</sub>) spectrum of compound **21**

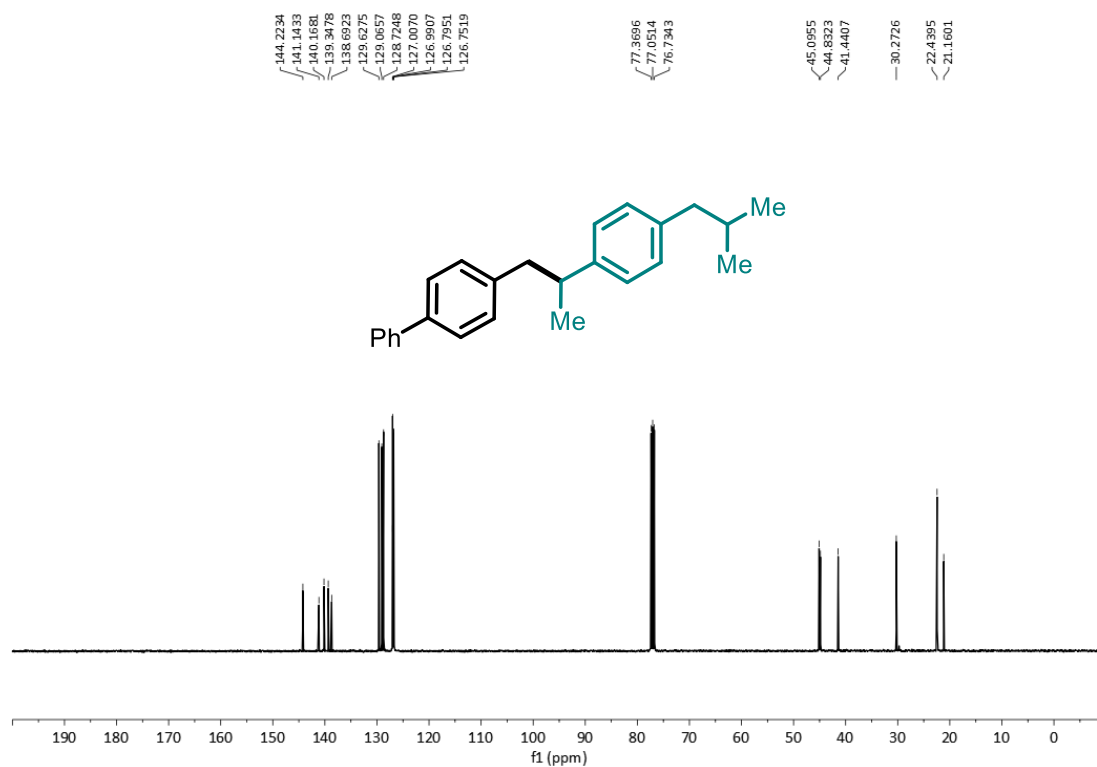

<sup>13</sup>C NMR (100 MHz, CDCl<sub>3</sub>) spectrum of compound **21**

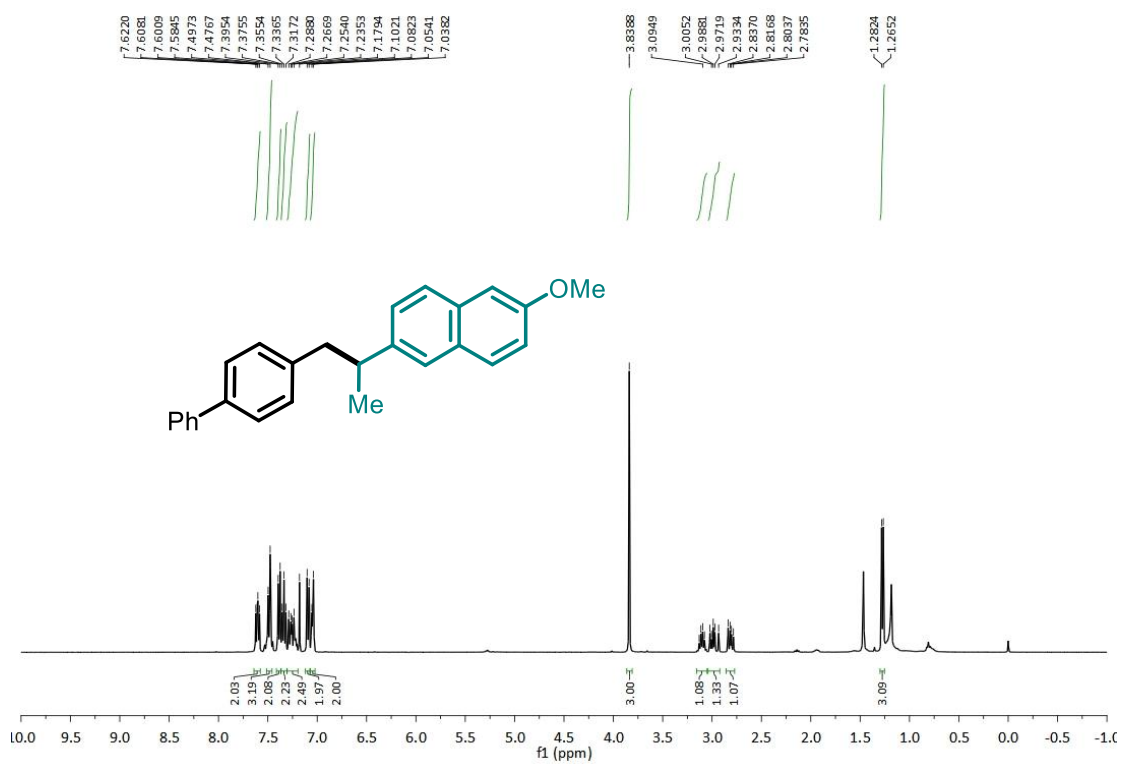

<sup>1</sup>H NMR (400 MHz, CDCl<sub>3</sub>) spectrum of compound **22**

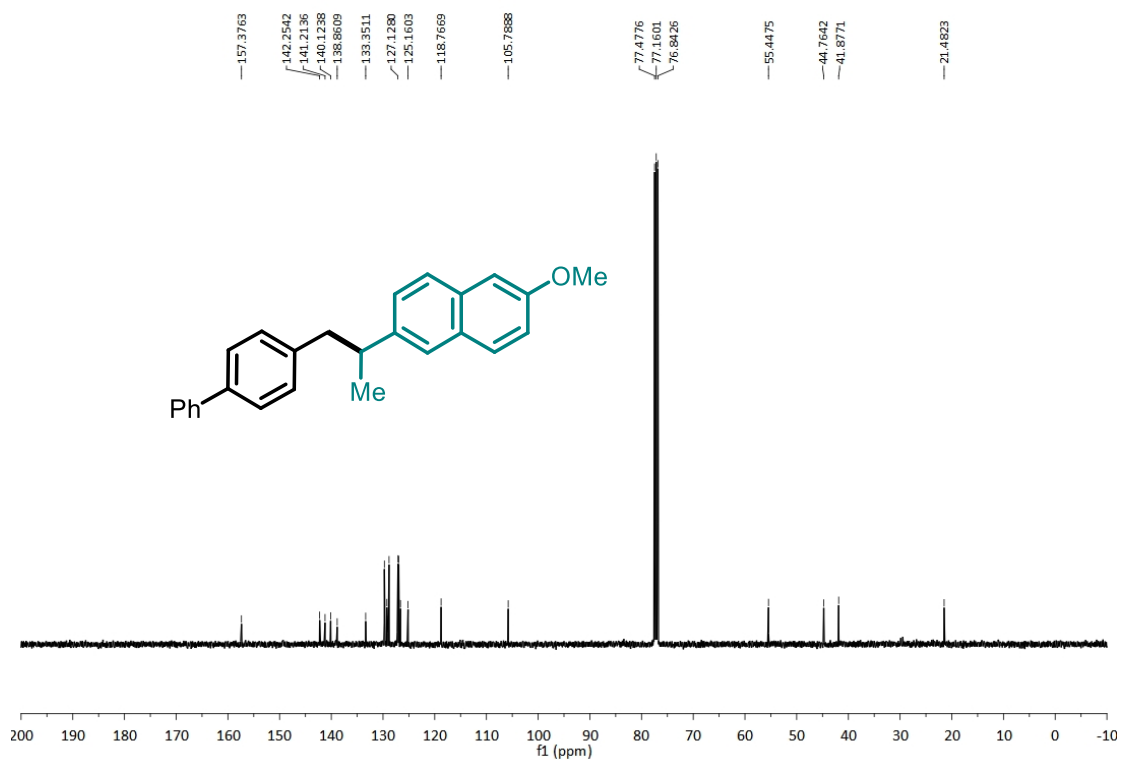

<sup>13</sup>C NMR (100 MHz, CDCl<sub>3</sub>) spectrum of compound **22**

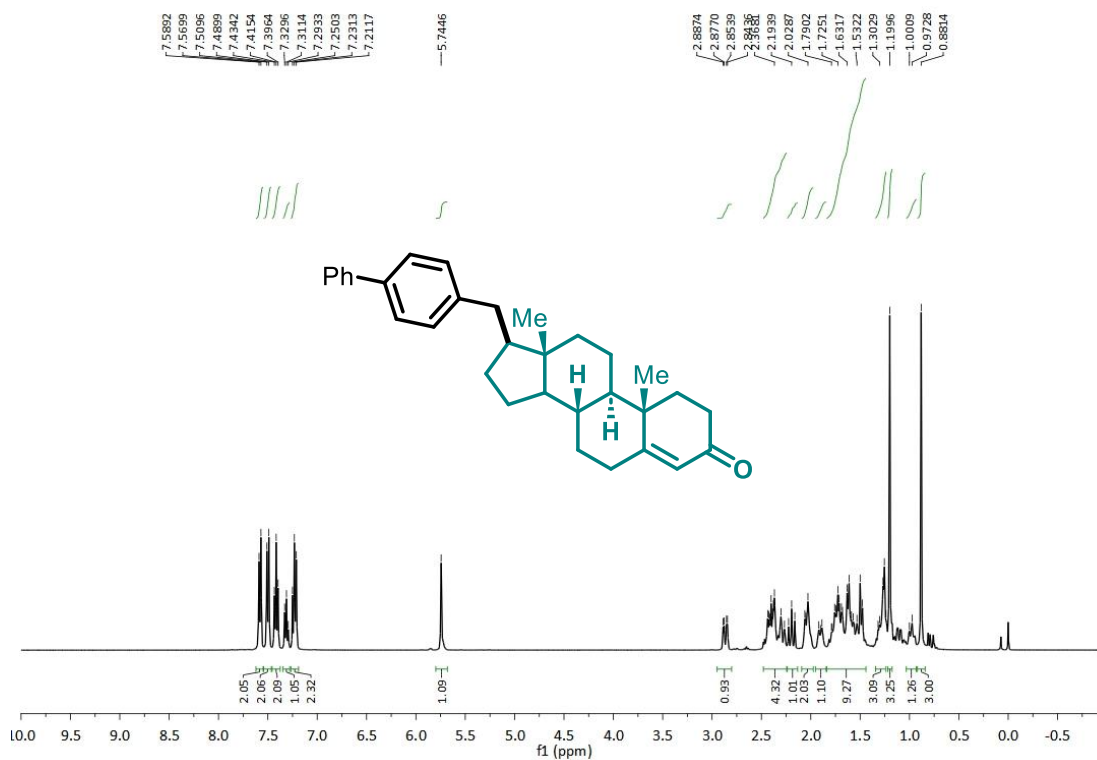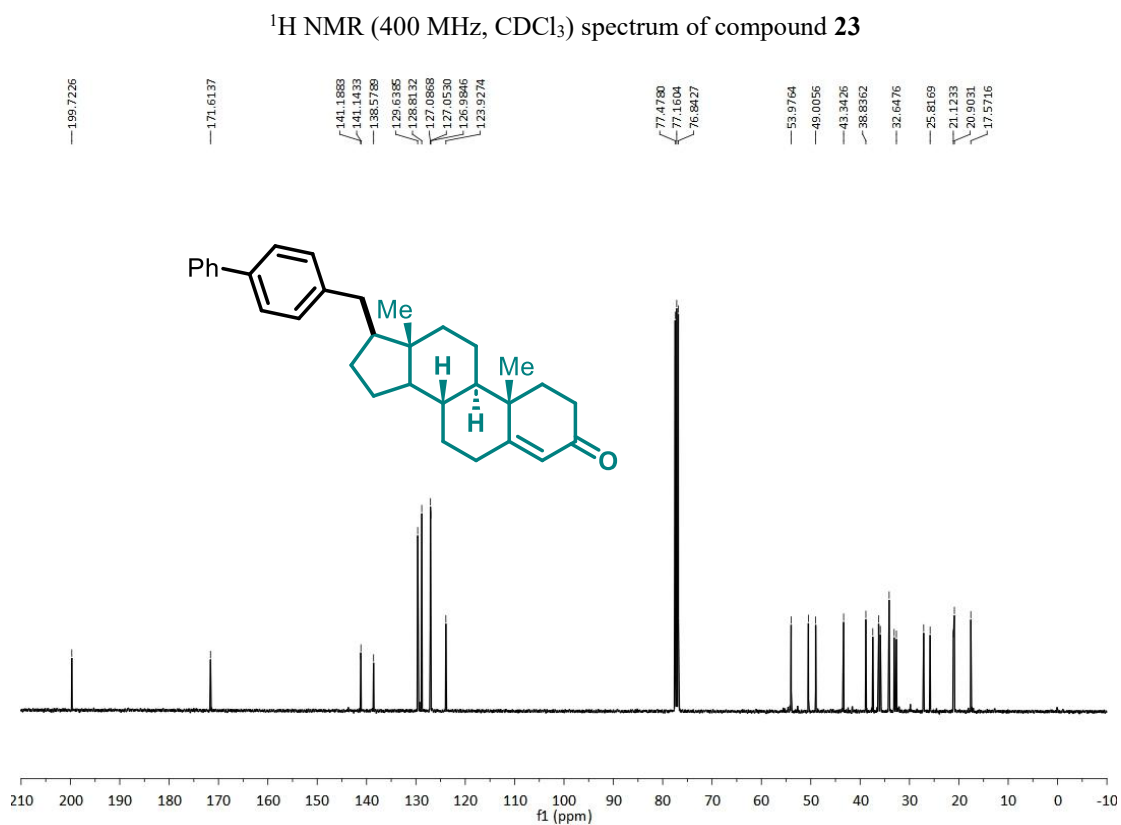

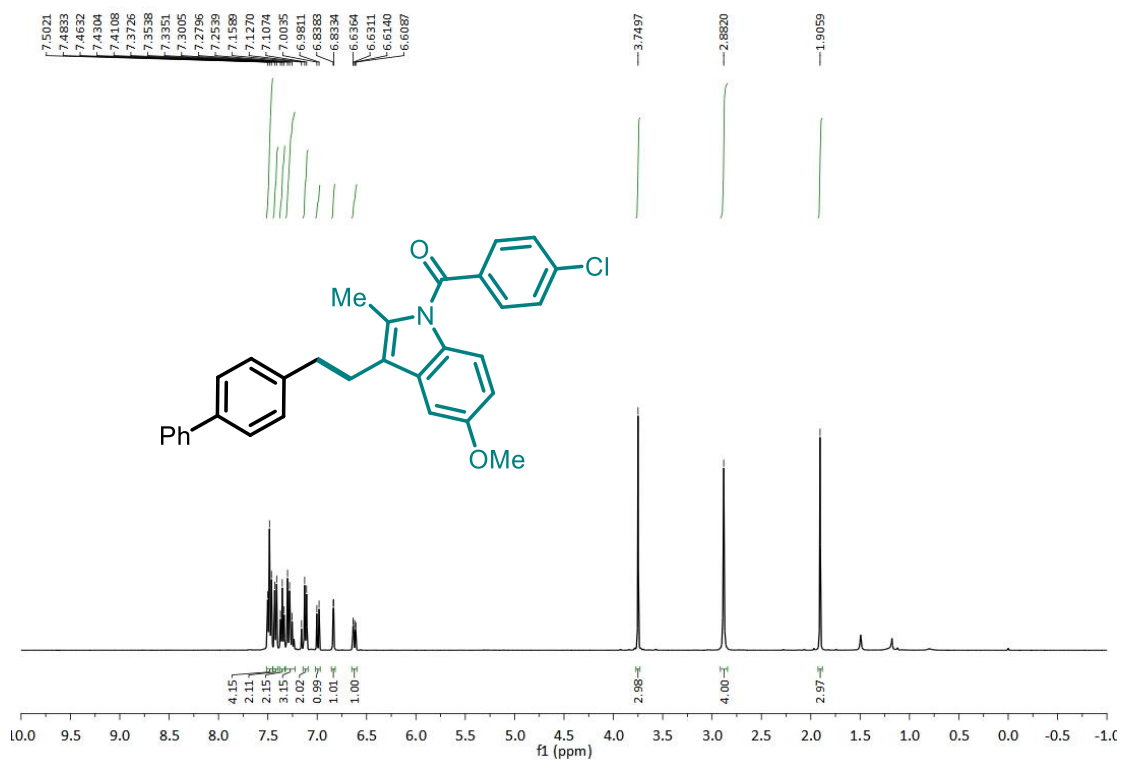

**<sup>1</sup>H NMR (400 MHz, CDCl<sub>3</sub>) spectrum of compound **24****

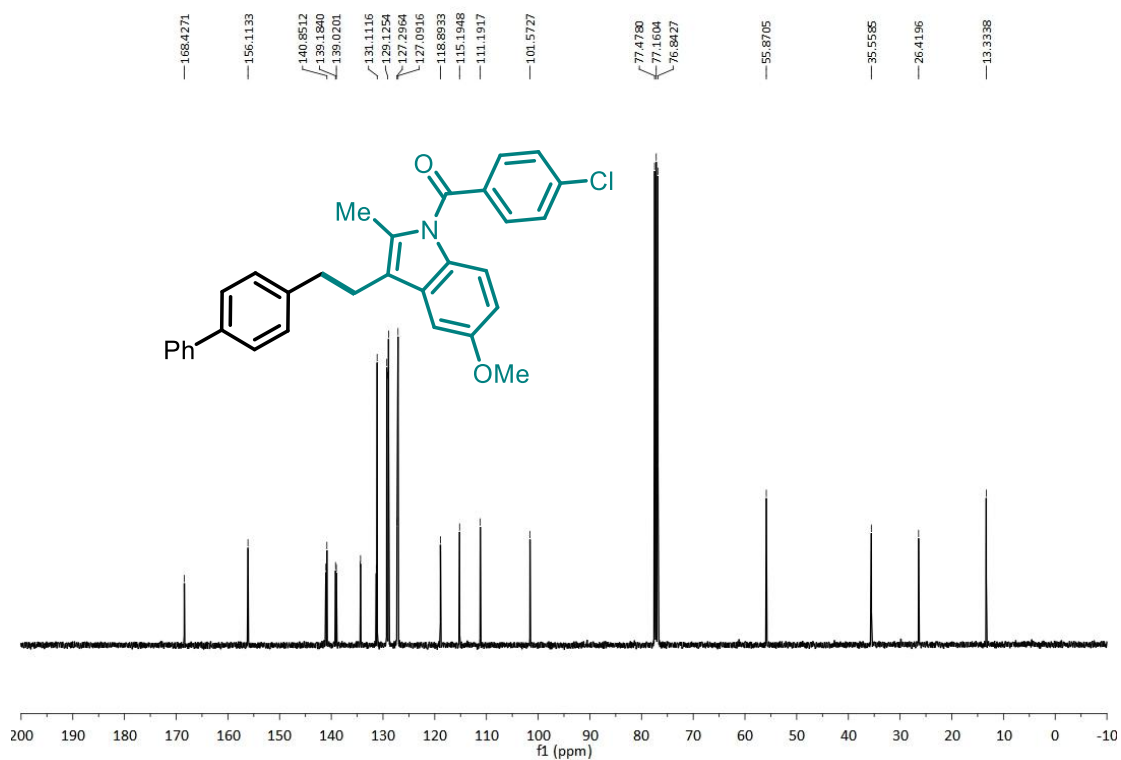

**<sup>13</sup>C NMR (100 MHz, CDCl<sub>3</sub>) spectrum of compound **24****

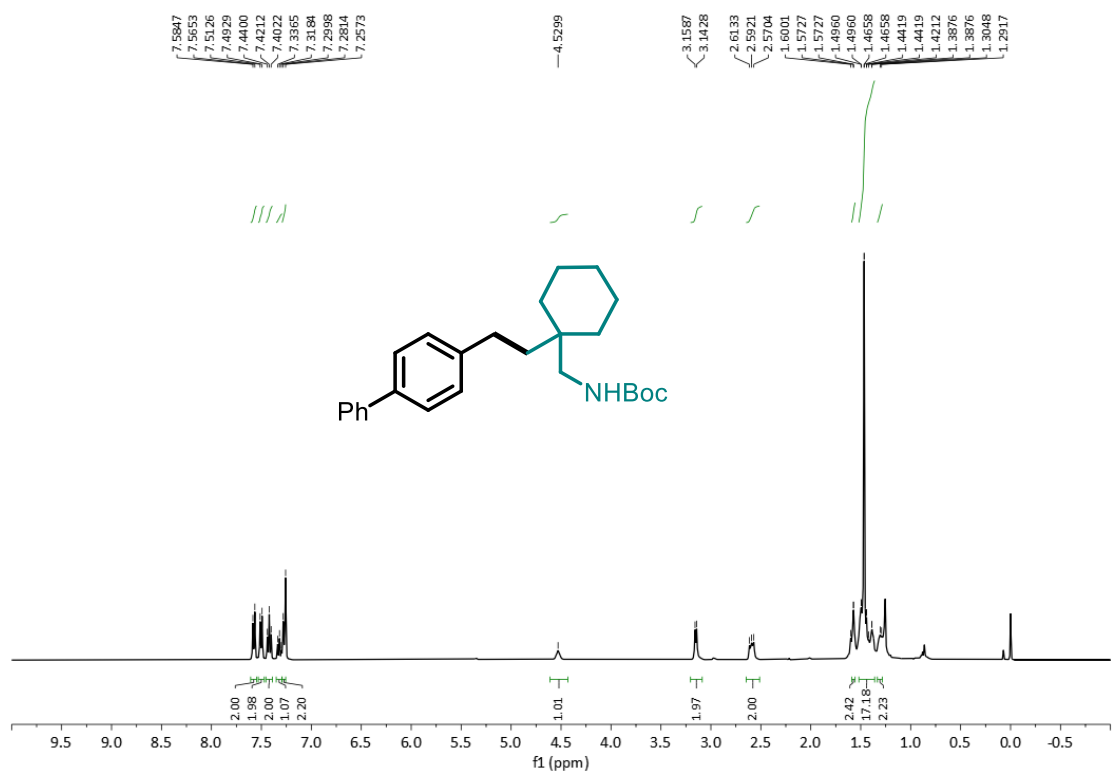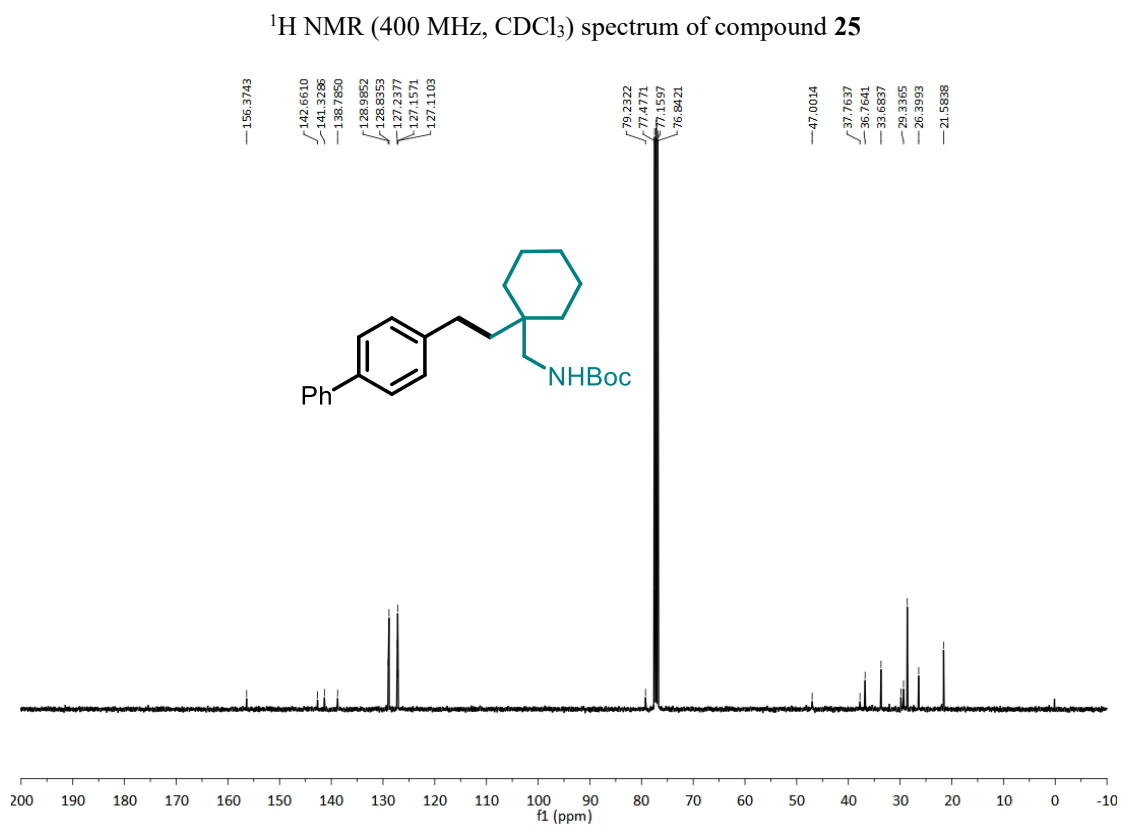

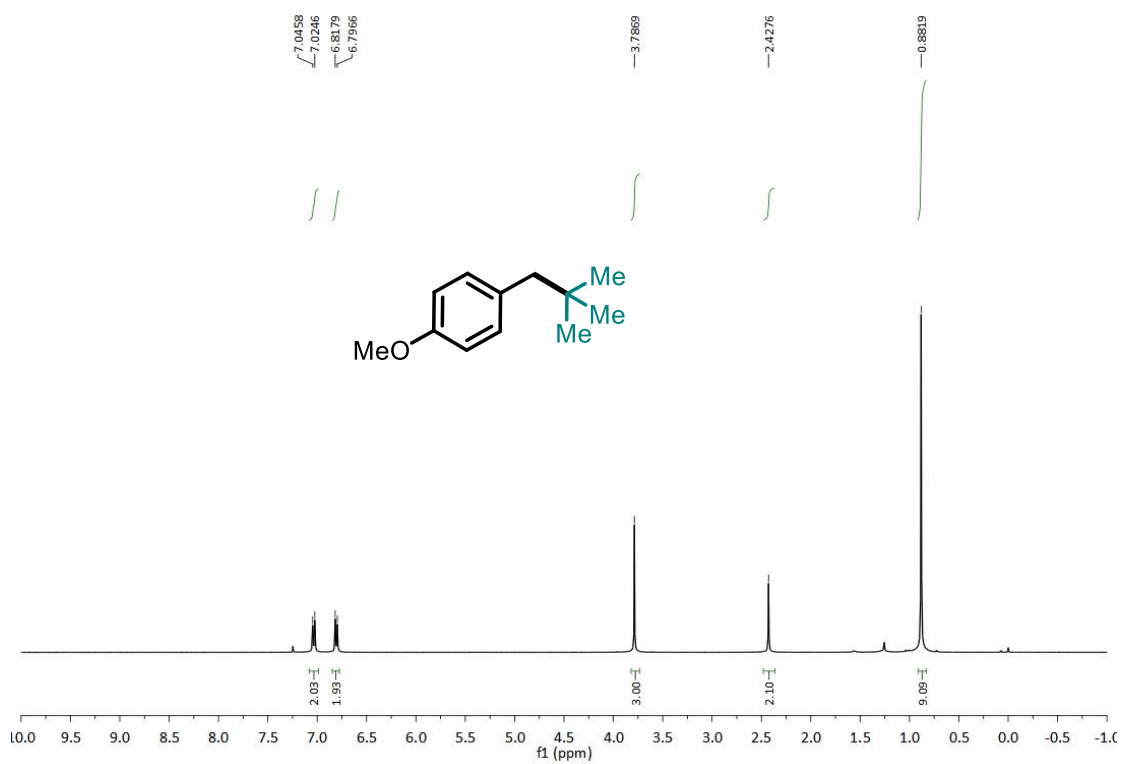

<sup>1</sup>H NMR (400 MHz, CDCl<sub>3</sub>) spectrum of compound **26**

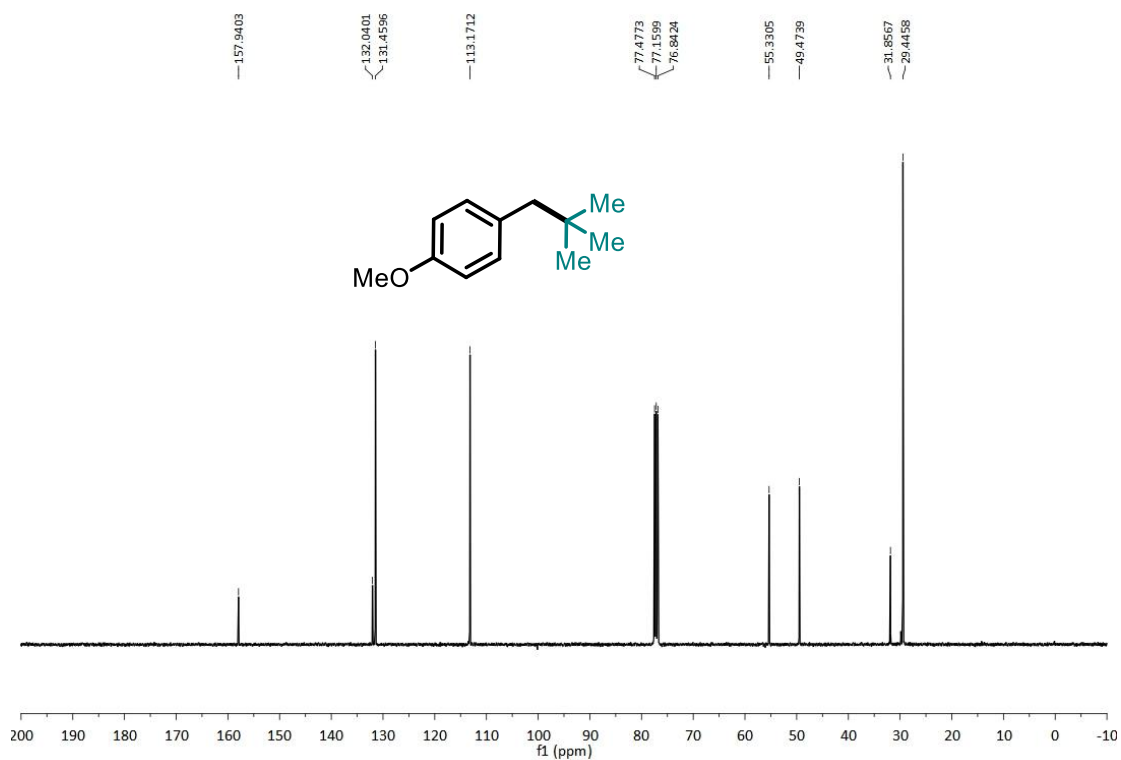

<sup>13</sup>C NMR (100 MHz, CDCl<sub>3</sub>) spectrum of compound **26**

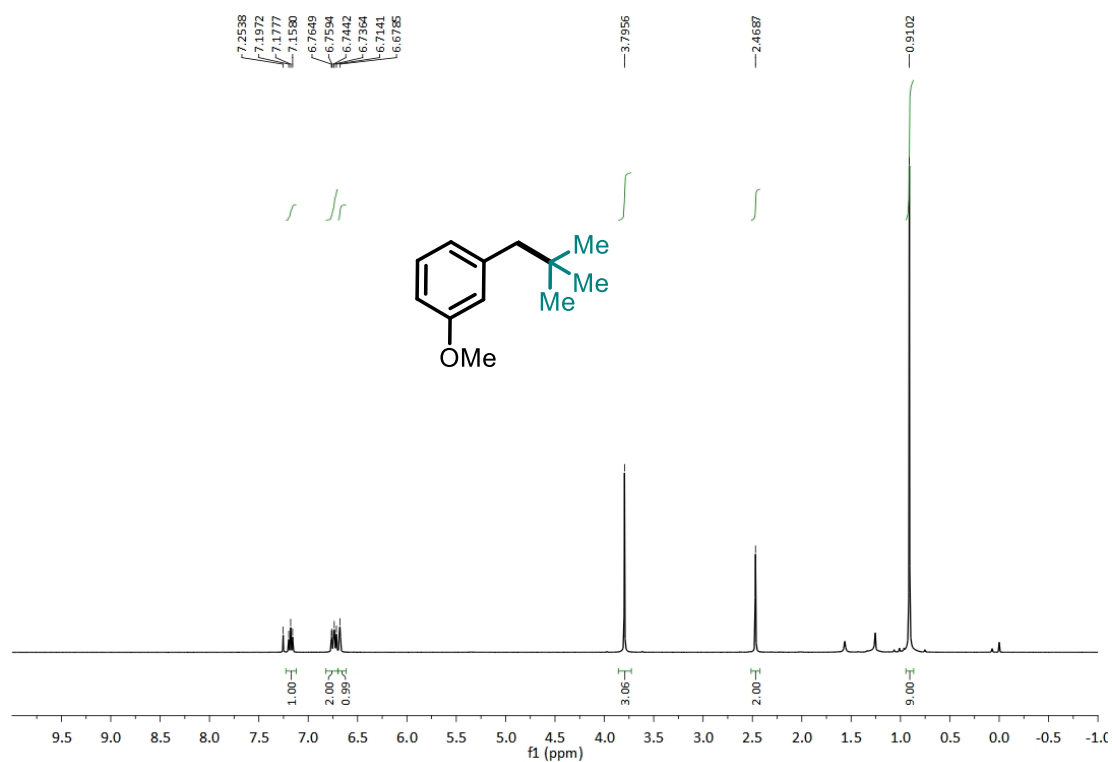

$^1\text{H}$  NMR (400 MHz,  $\text{CDCl}_3$ ) spectrum of compound **27**

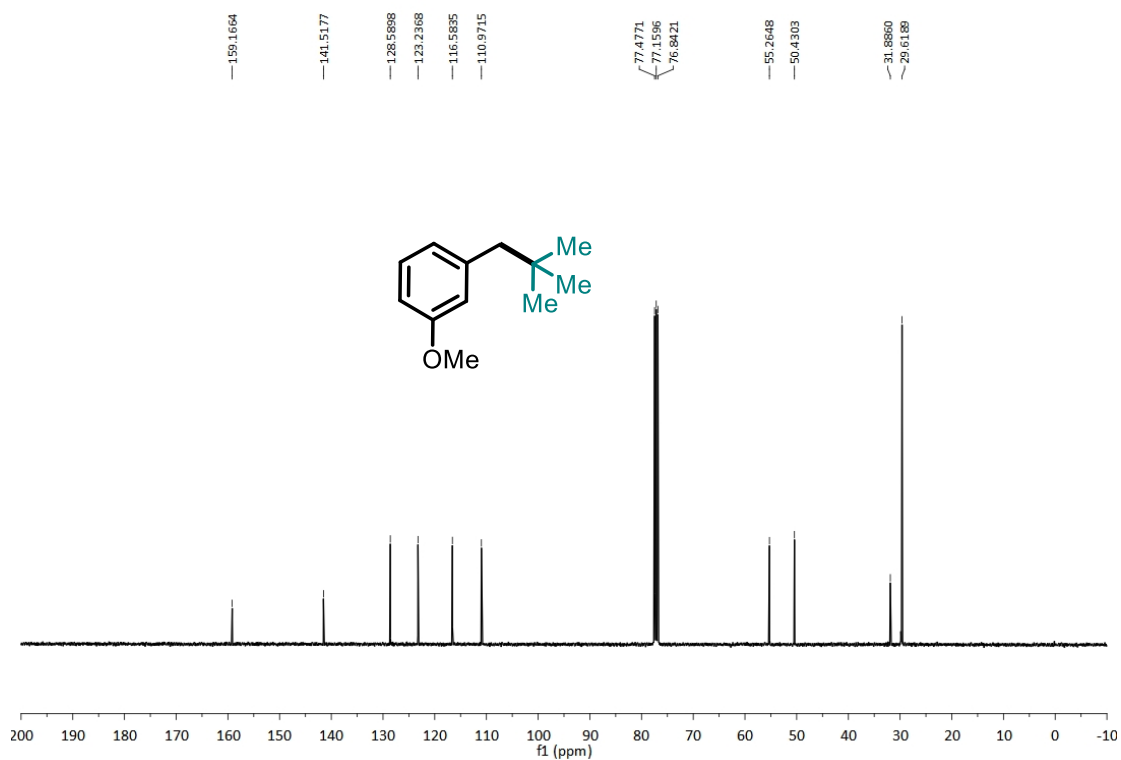

$^{13}\text{C}$  NMR (100 MHz,  $\text{CDCl}_3$ ) spectrum of compound **27**

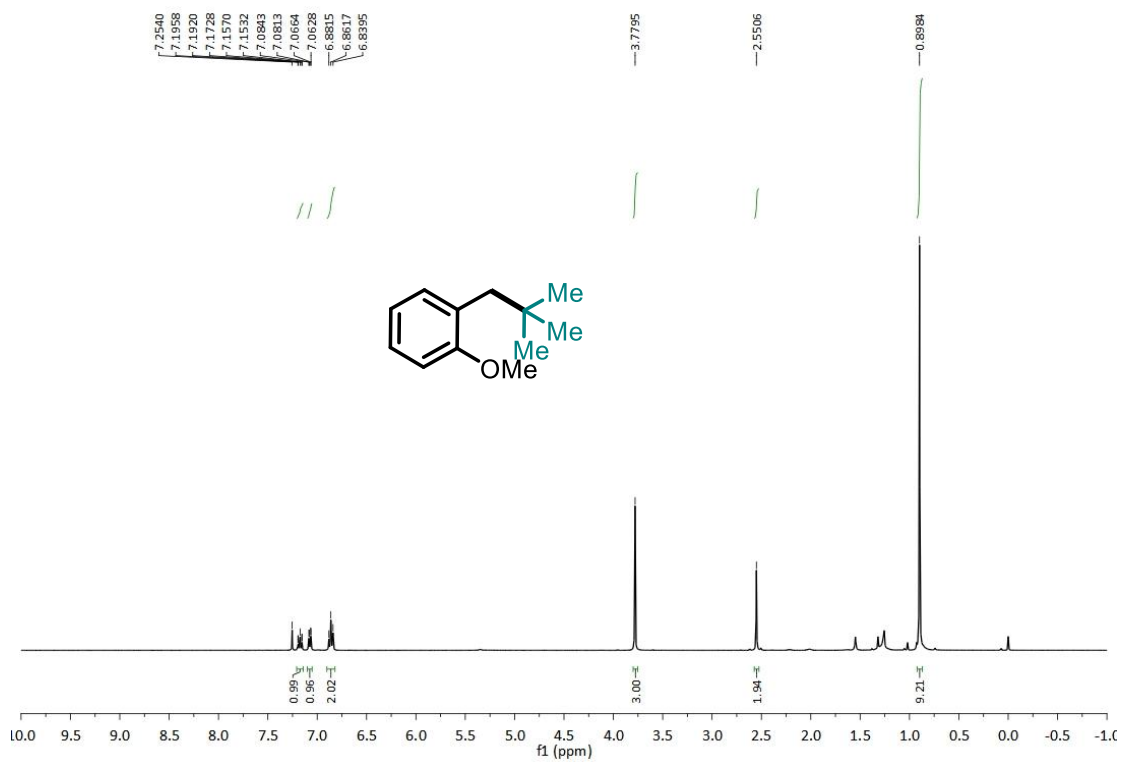

<sup>1</sup>H NMR (400 MHz, CDCl<sub>3</sub>) spectrum of compound **28**

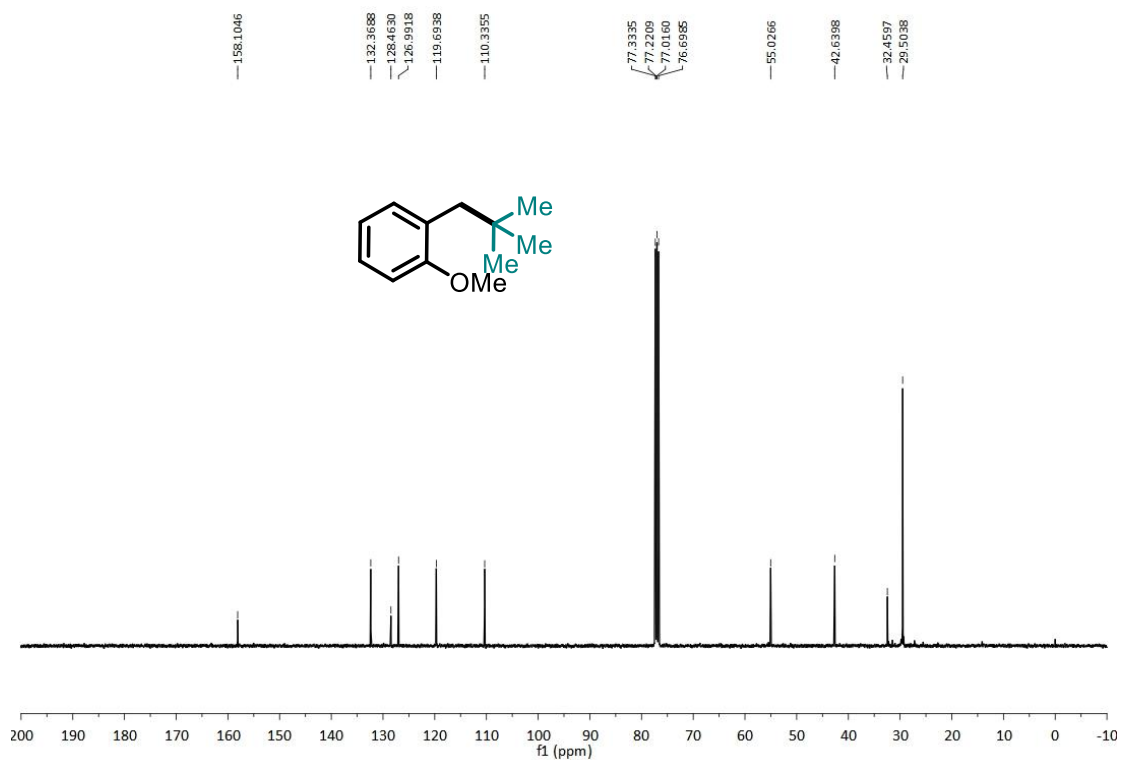

<sup>13</sup>C NMR (100 MHz, CDCl<sub>3</sub>) spectrum of compound **28**

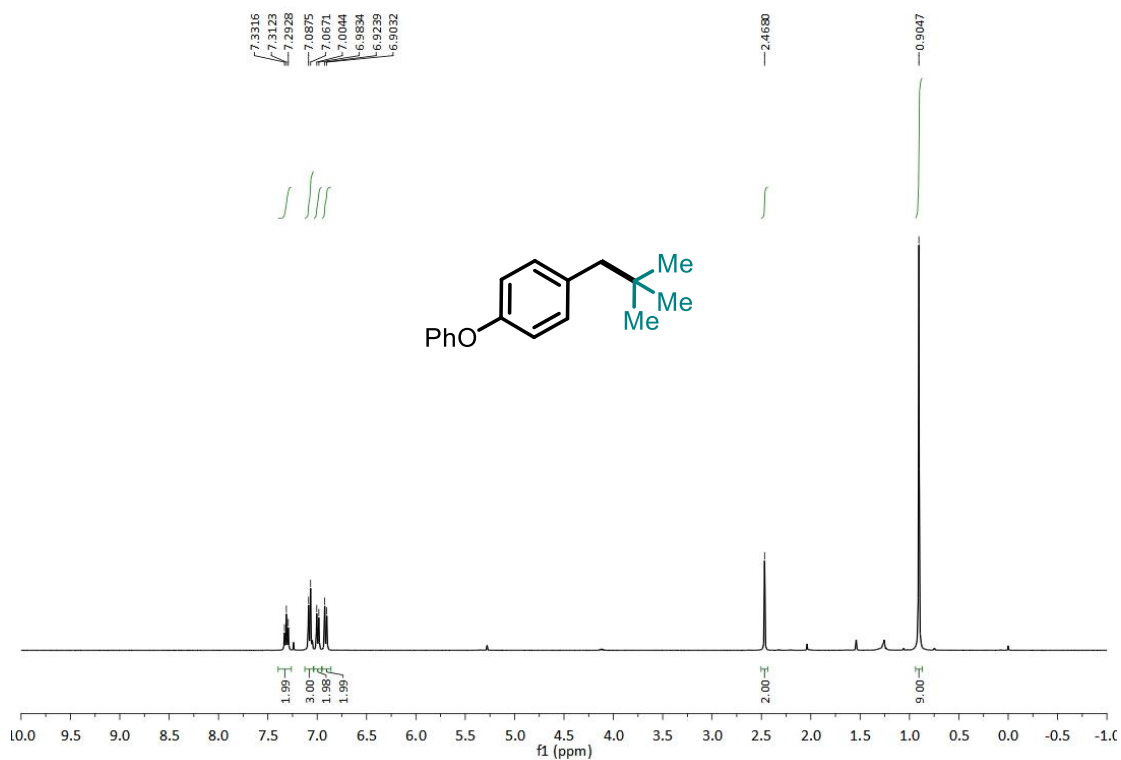

<sup>1</sup>H NMR (400 MHz, CDCl<sub>3</sub>) spectrum of compound **29**

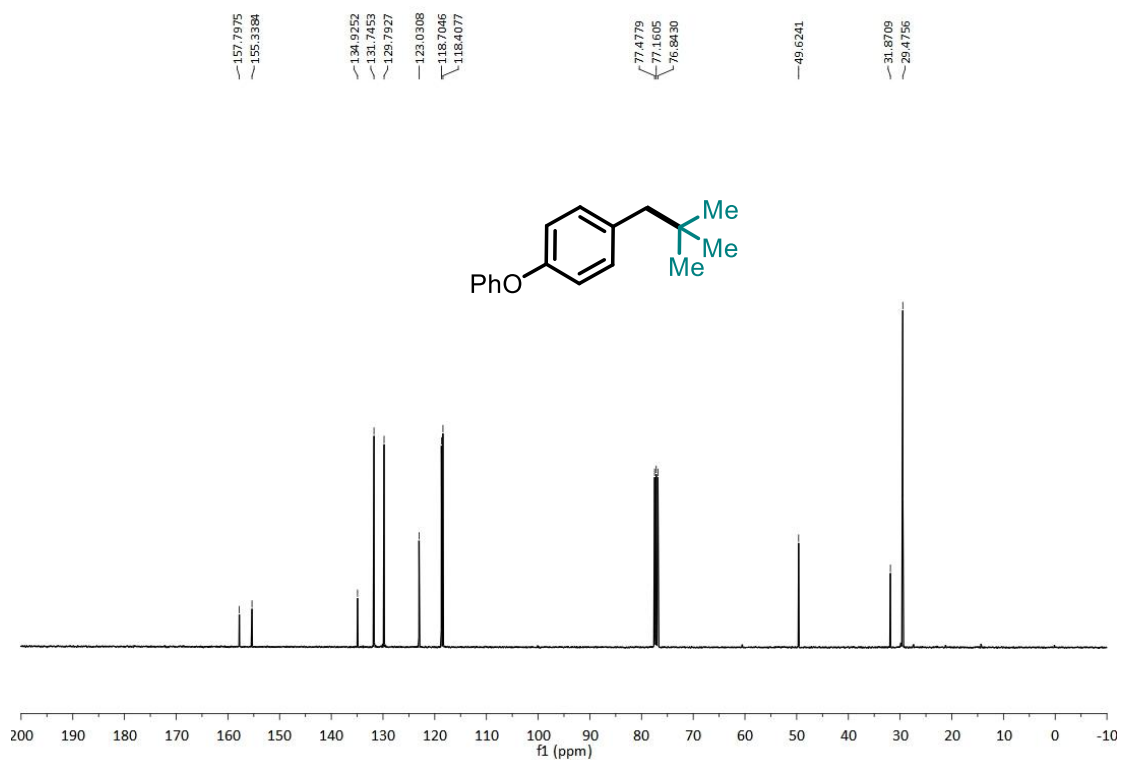

<sup>13</sup>C NMR (100 MHz, CDCl<sub>3</sub>) spectrum of compound **29**

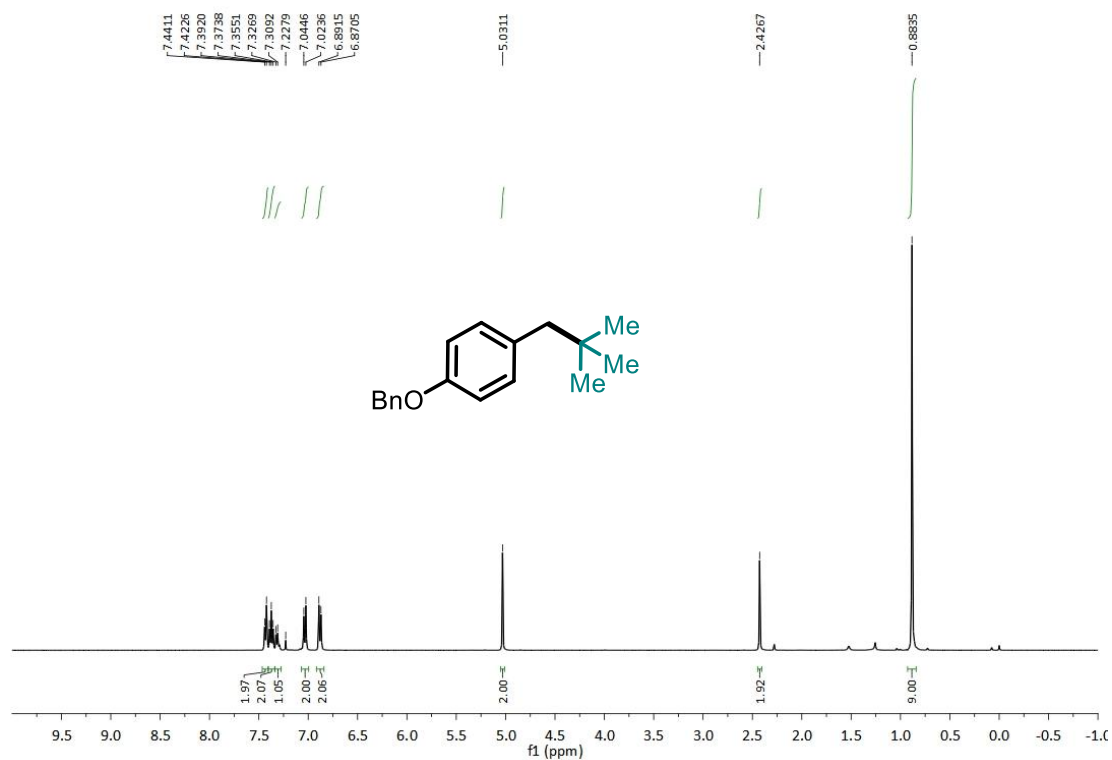

<sup>1</sup>H NMR (400 MHz, CDCl<sub>3</sub>) spectrum of compound **30**

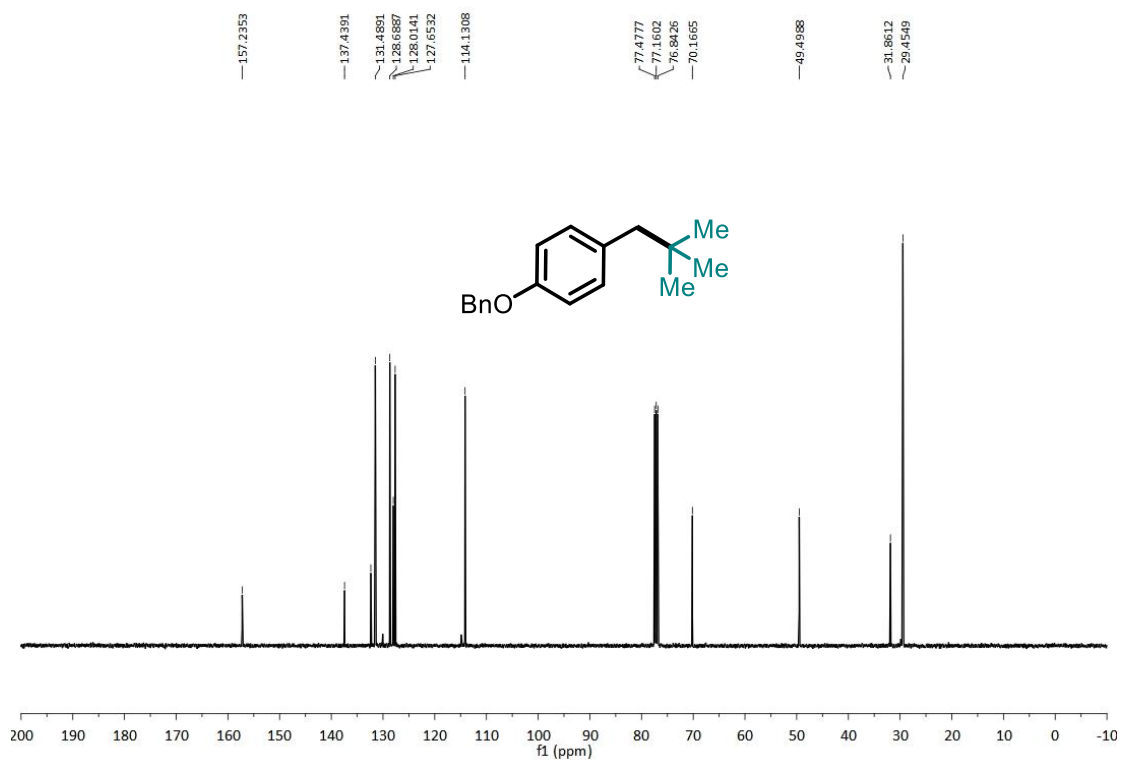

<sup>13</sup>C NMR (100 MHz, CDCl<sub>3</sub>) spectrum of compound **30**

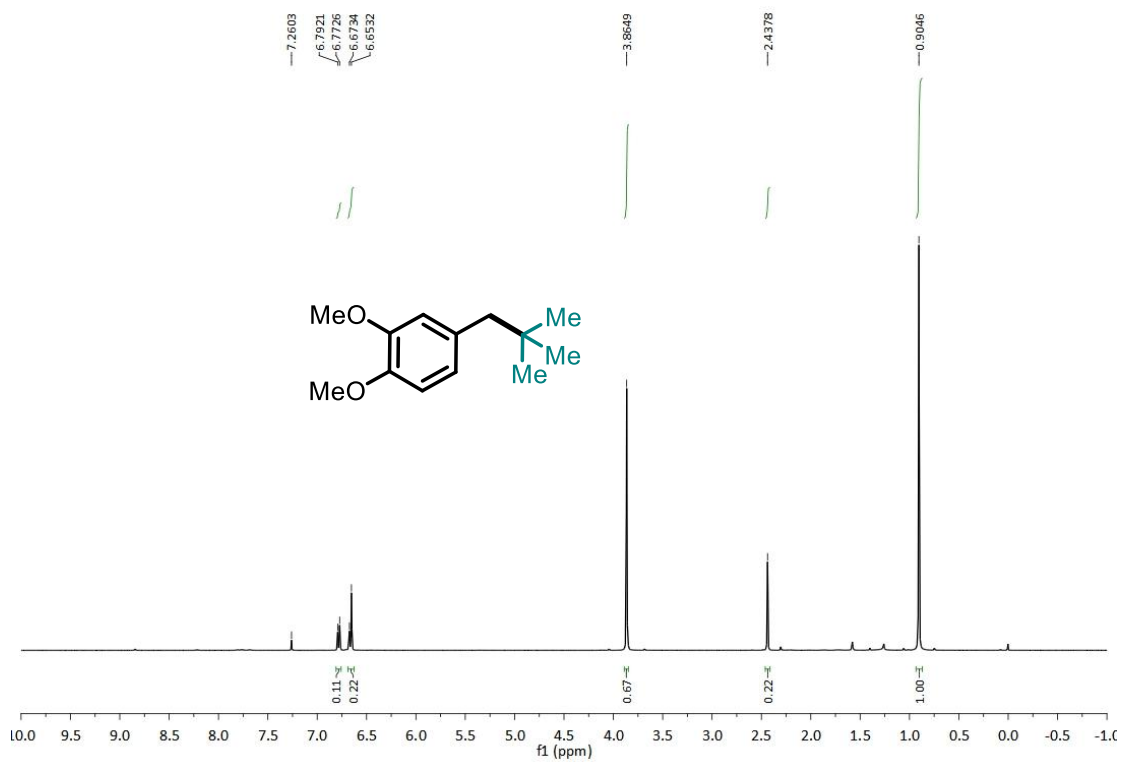

<sup>1</sup>H NMR (400 MHz, CDCl<sub>3</sub>) spectrum of compound **30**

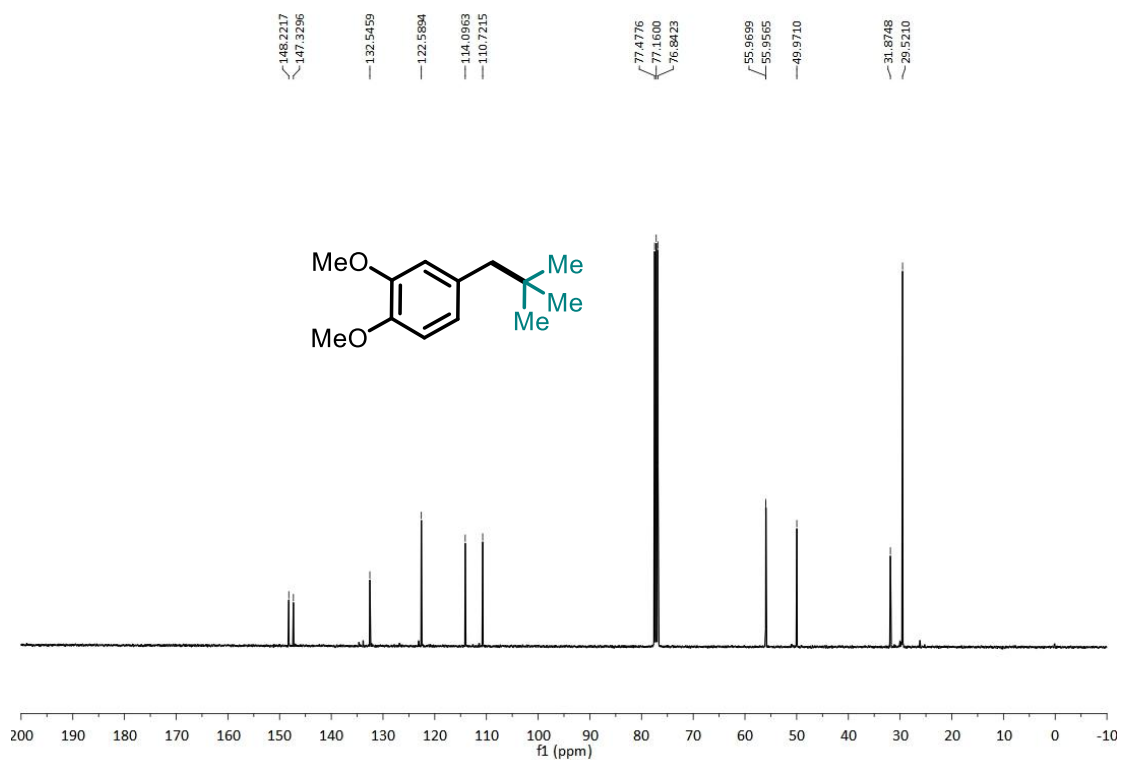

<sup>13</sup>C NMR (100 MHz, CDCl<sub>3</sub>) spectrum of compound **31**

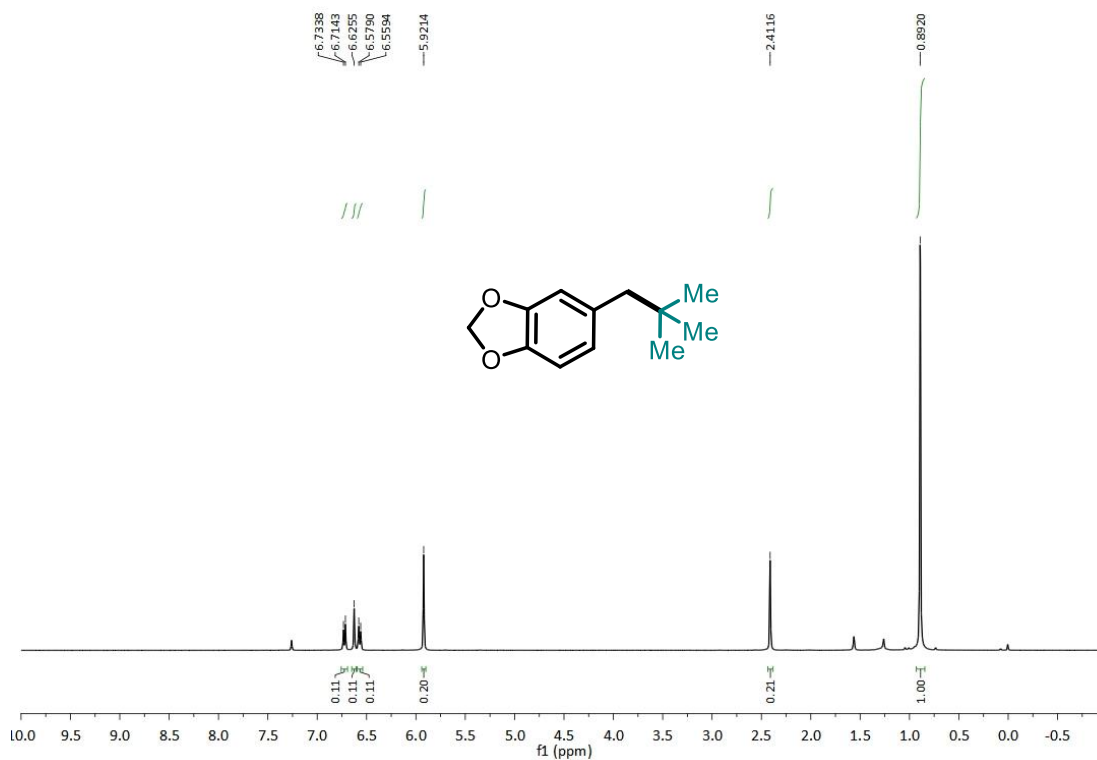

<sup>1</sup>H NMR (400 MHz, CDCl<sub>3</sub>) spectrum of compound **32**

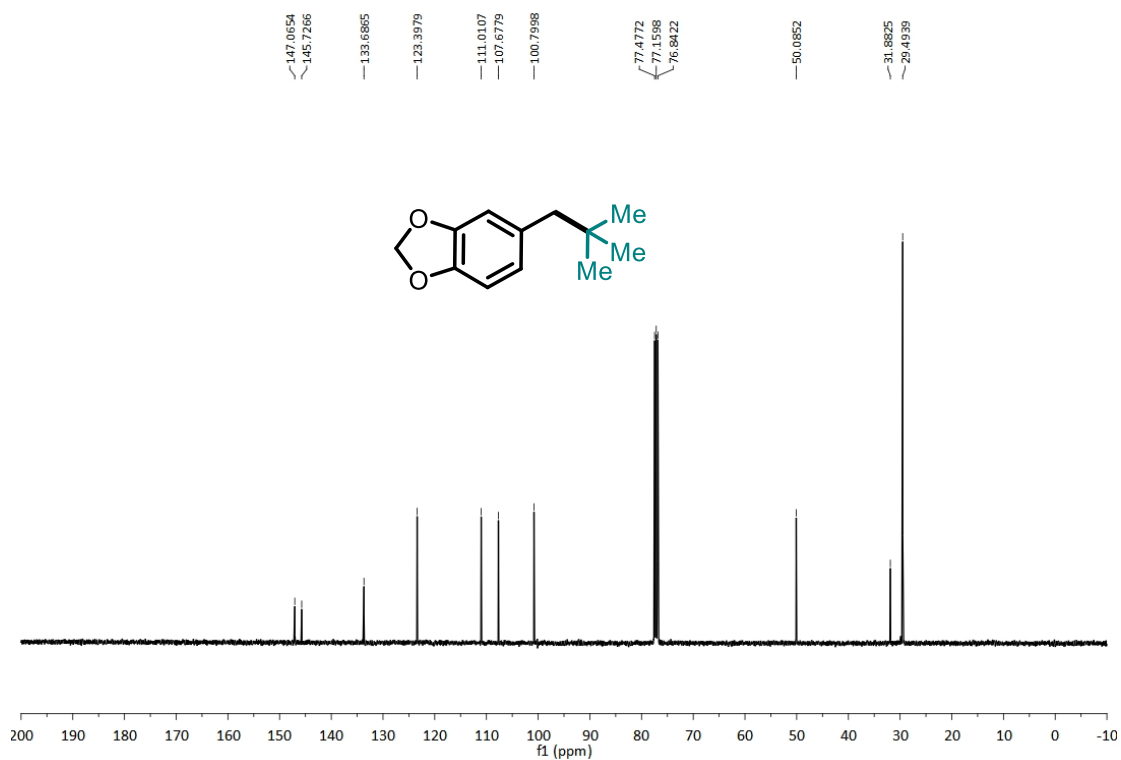

<sup>13</sup>C NMR (100 MHz, CDCl<sub>3</sub>) spectrum of compound **32**

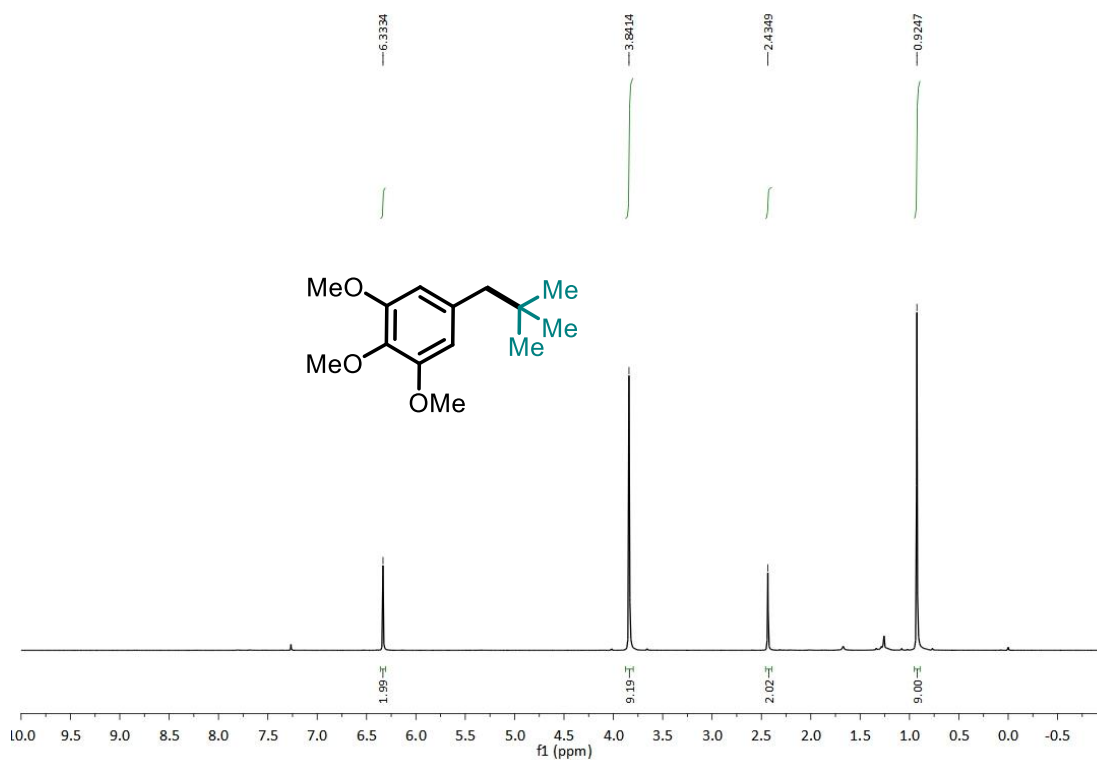

<sup>1</sup>H NMR (400 MHz, CDCl<sub>3</sub>) spectrum of compound **33**

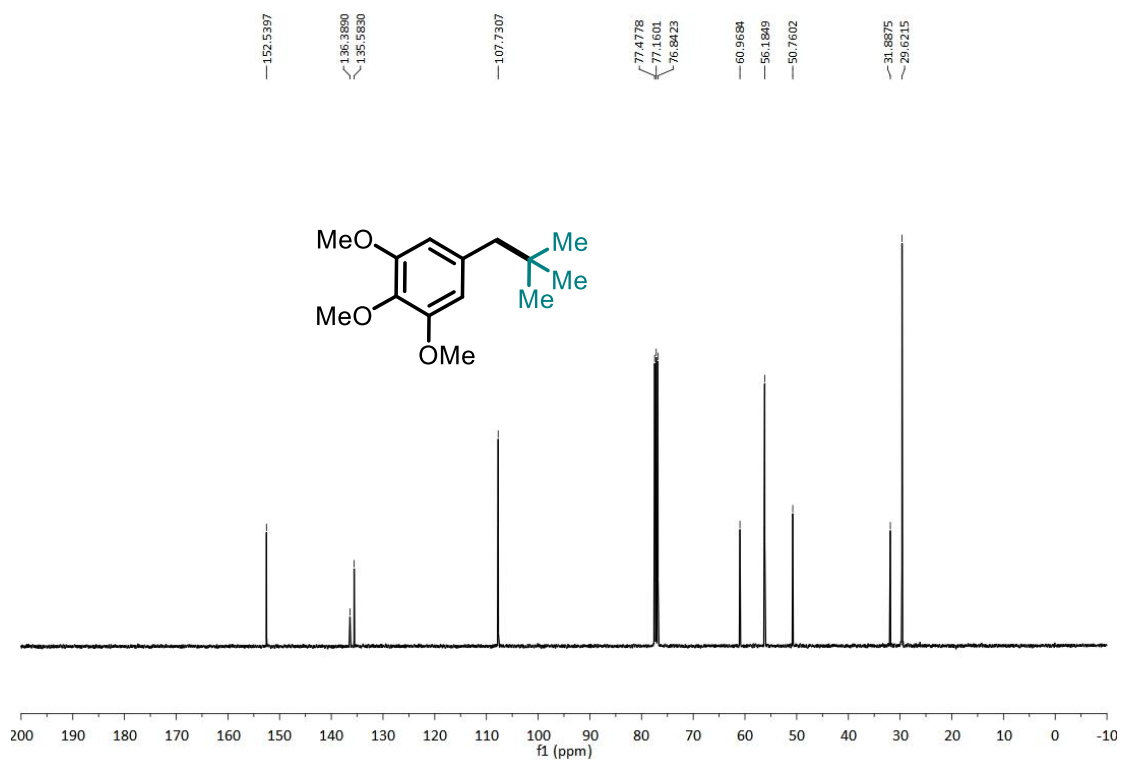

<sup>13</sup>C NMR (100 MHz, CDCl<sub>3</sub>) spectrum of compound **33**

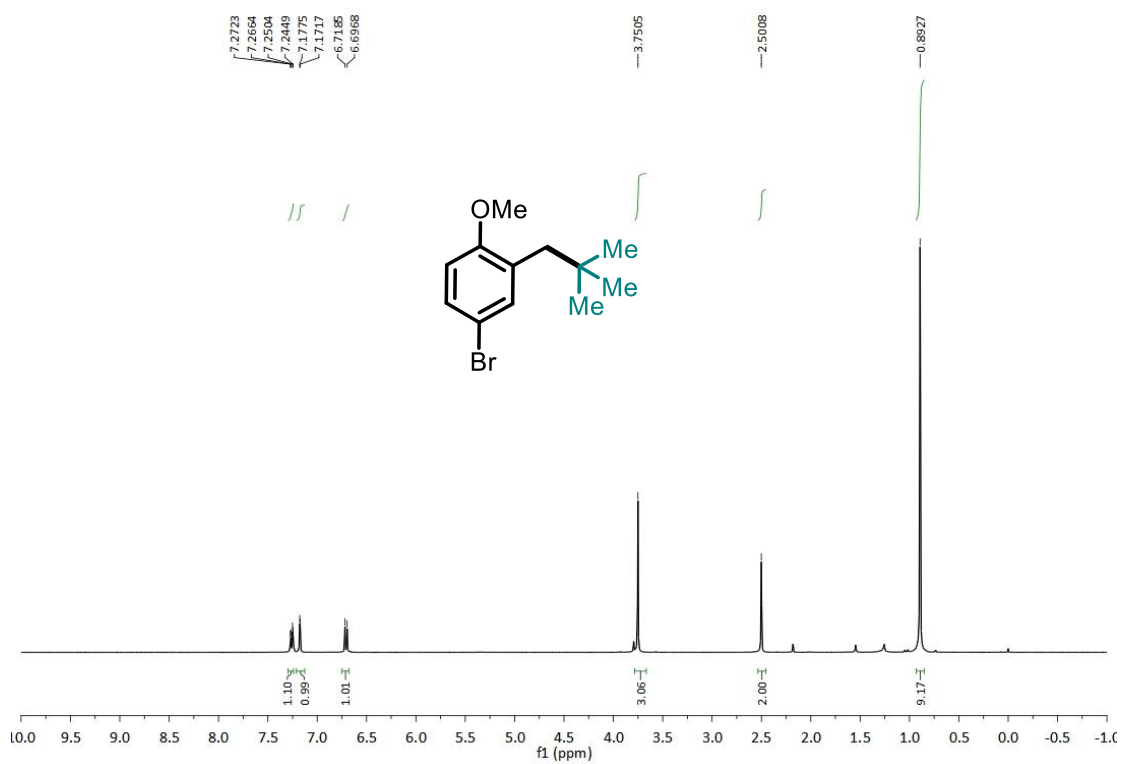

<sup>1</sup>H NMR (400 MHz, CDCl<sub>3</sub>) spectrum of compound **34**

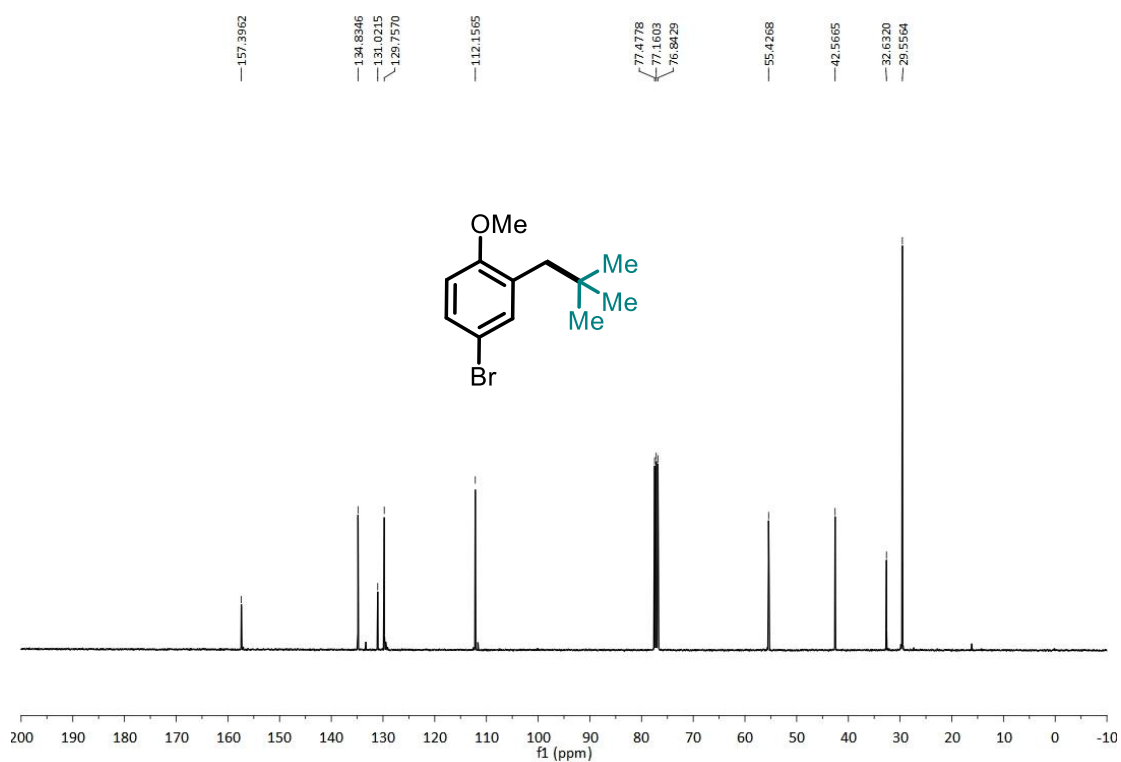

<sup>13</sup>C NMR (100 MHz, CDCl<sub>3</sub>) spectrum of compound **34**

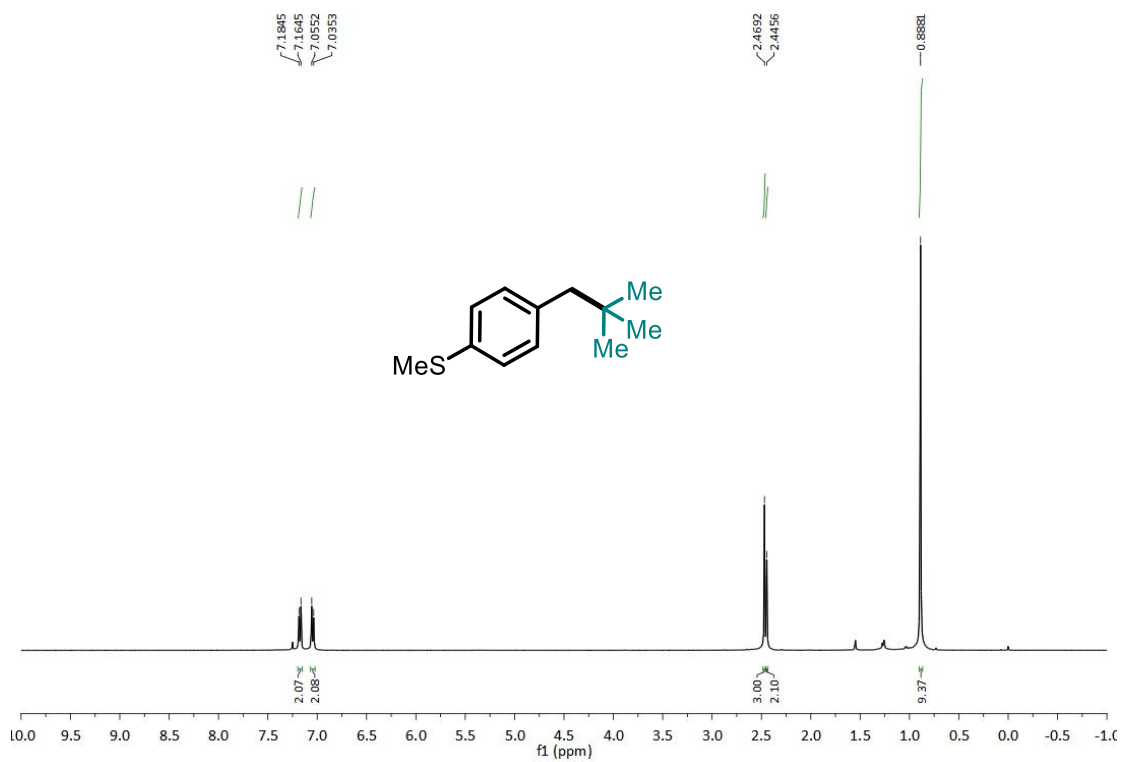

$^1\text{H}$  NMR (400 MHz,  $\text{CDCl}_3$ ) spectrum of compound **35**

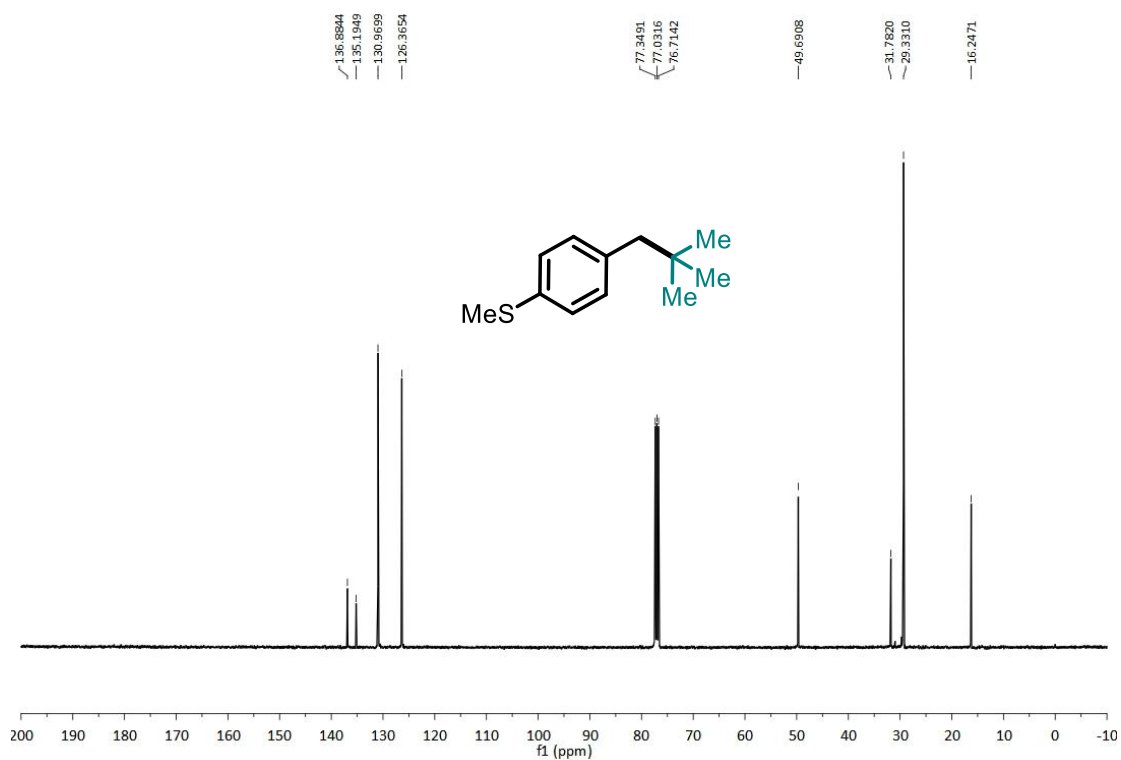

$^{13}\text{C}$  NMR (100 MHz,  $\text{CDCl}_3$ ) spectrum of compound **35**

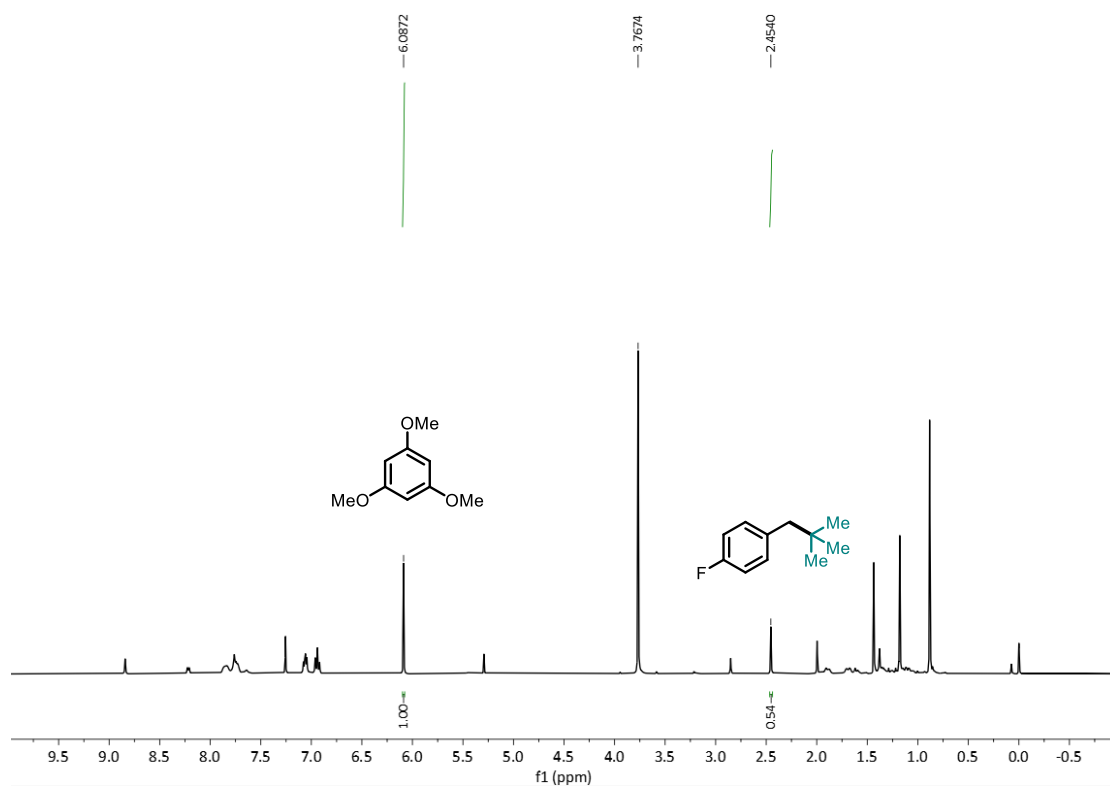

<sup>1</sup>H NMR (400 MHz, CDCl<sub>3</sub>) spectrum of compound **36**

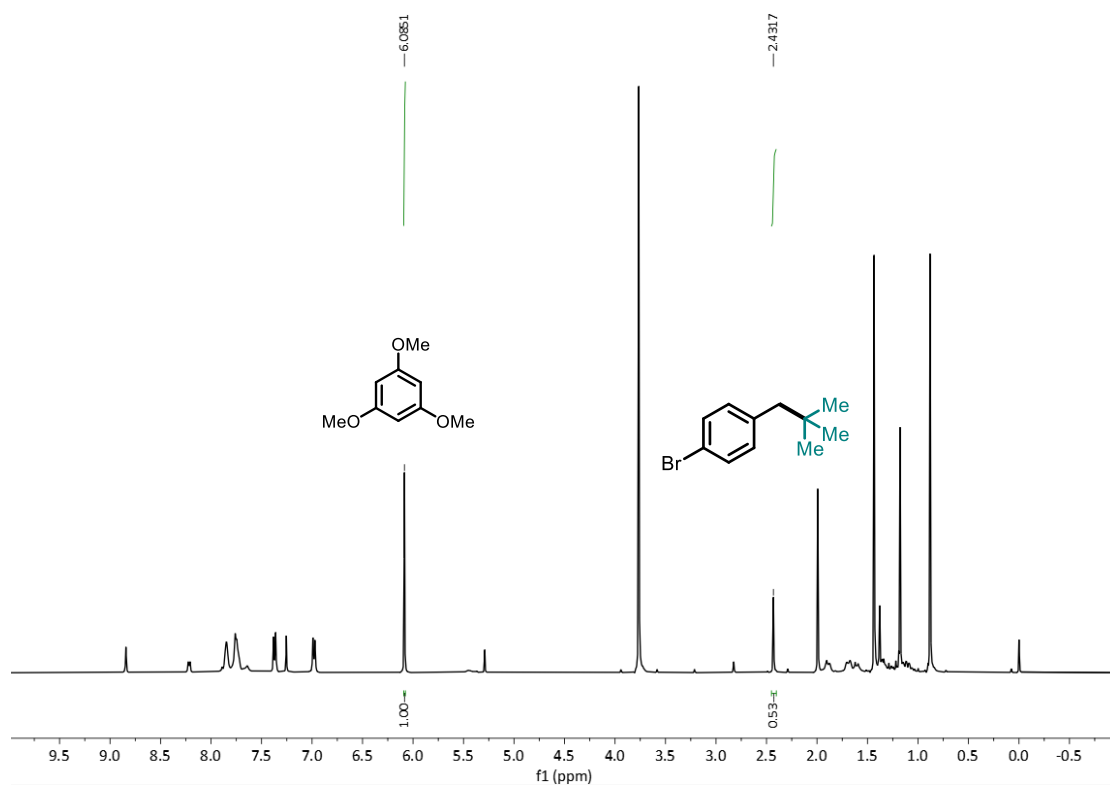

<sup>1</sup>H NMR (400 MHz, CDCl<sub>3</sub>) spectrum of compound **37**

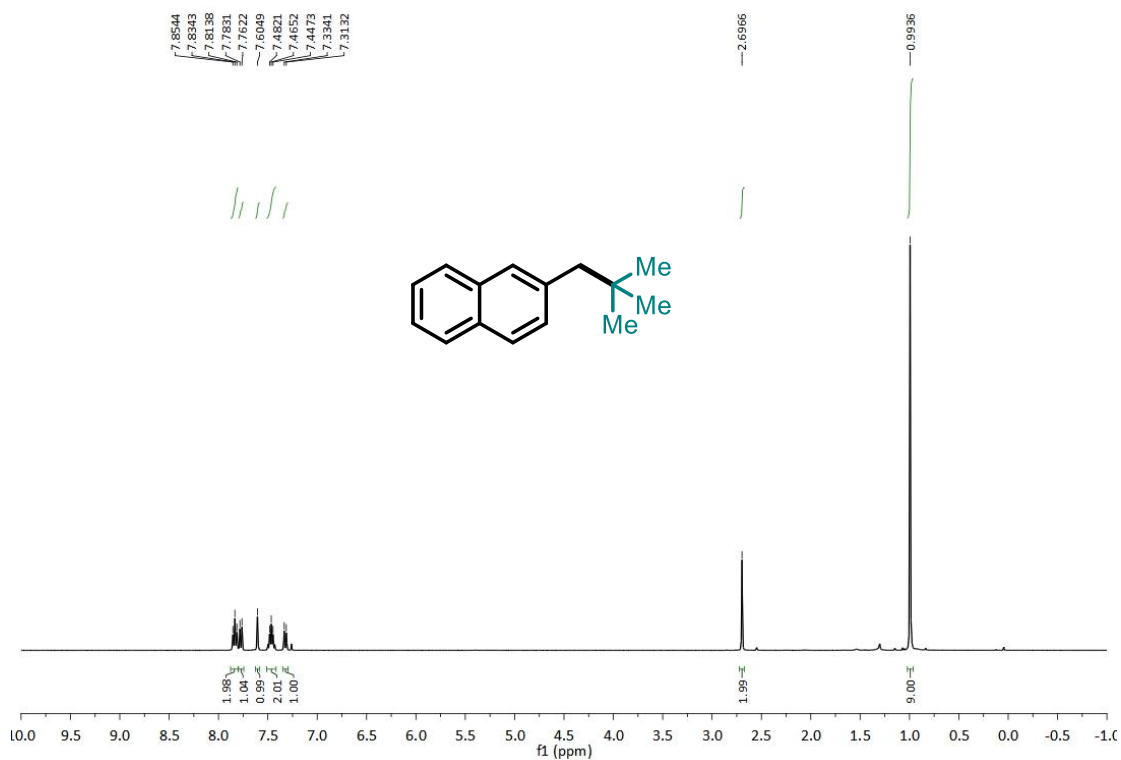

<sup>1</sup>H NMR (400 MHz, CDCl<sub>3</sub>) spectrum of compound **38**

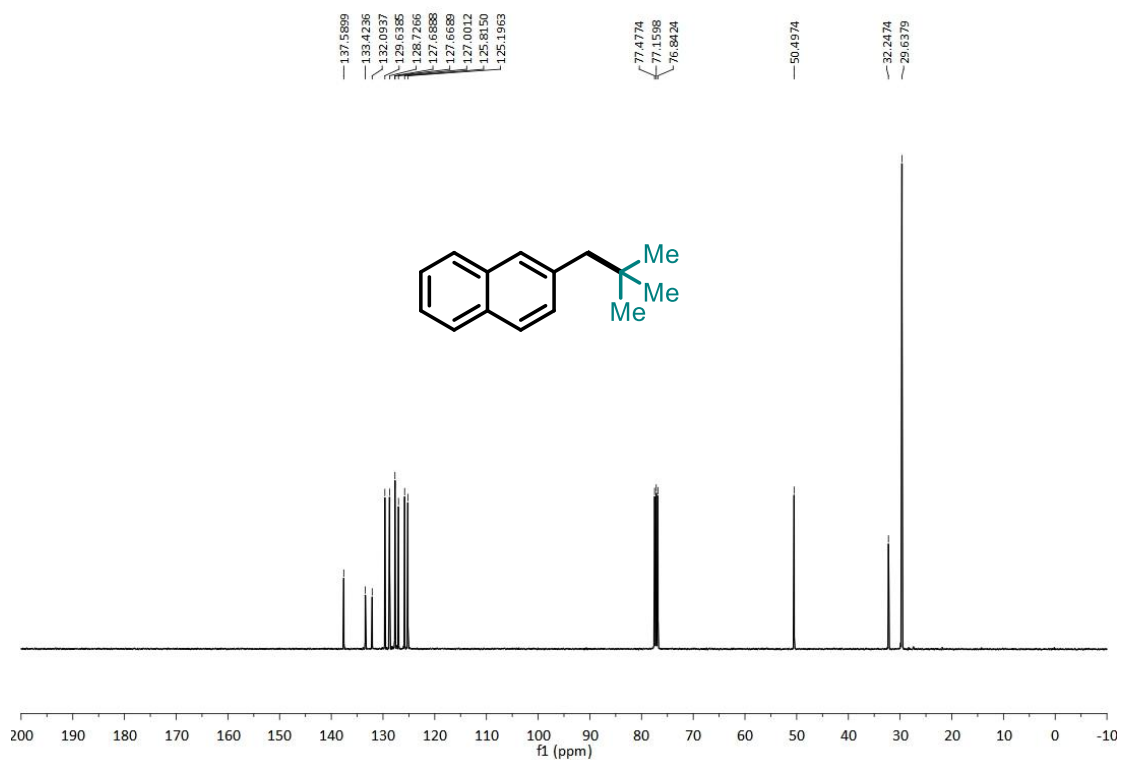

<sup>13</sup>C NMR (100 MHz, CDCl<sub>3</sub>) spectrum of compound **38**

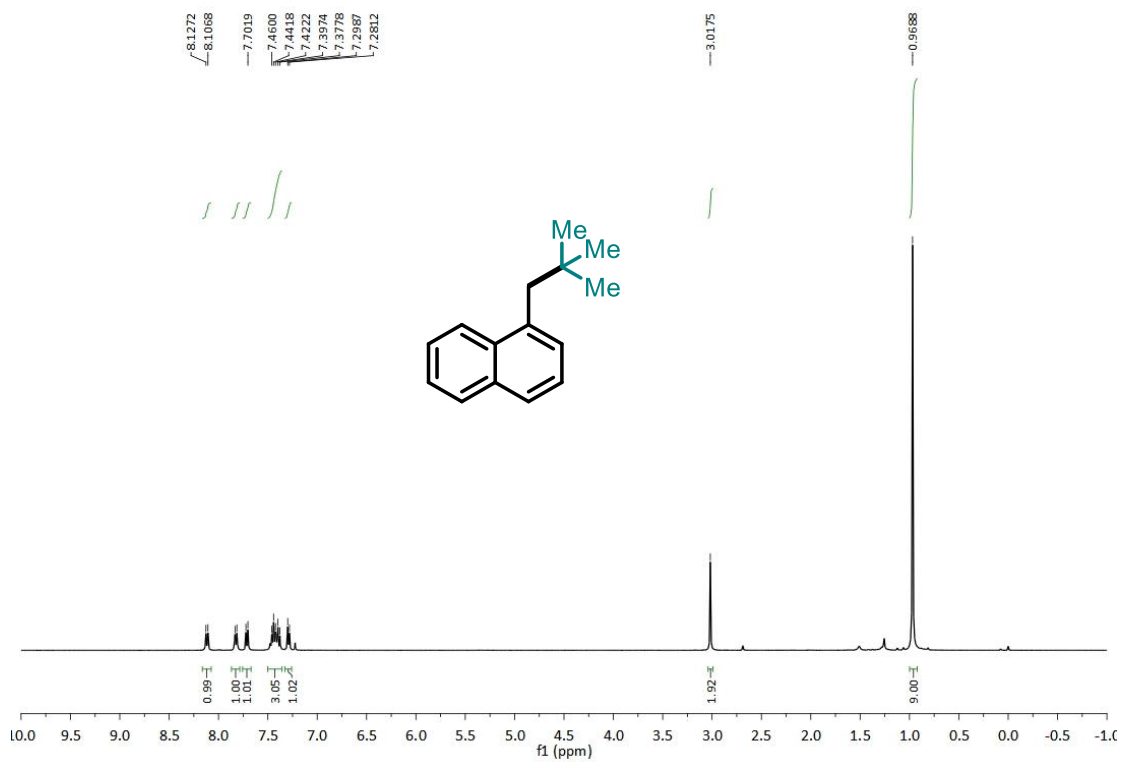

<sup>1</sup>H NMR (400 MHz, CDCl<sub>3</sub>) spectrum of compound **39**

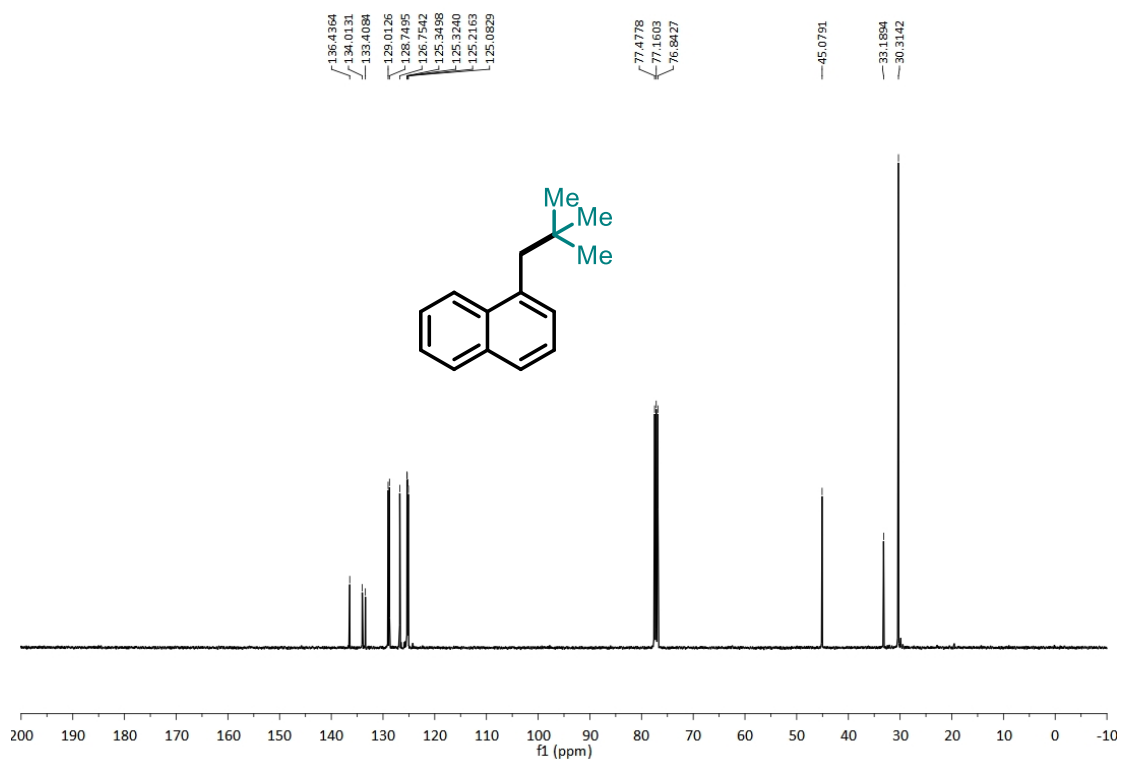

<sup>13</sup>C NMR (100 MHz, CDCl<sub>3</sub>) spectrum of compound **39**

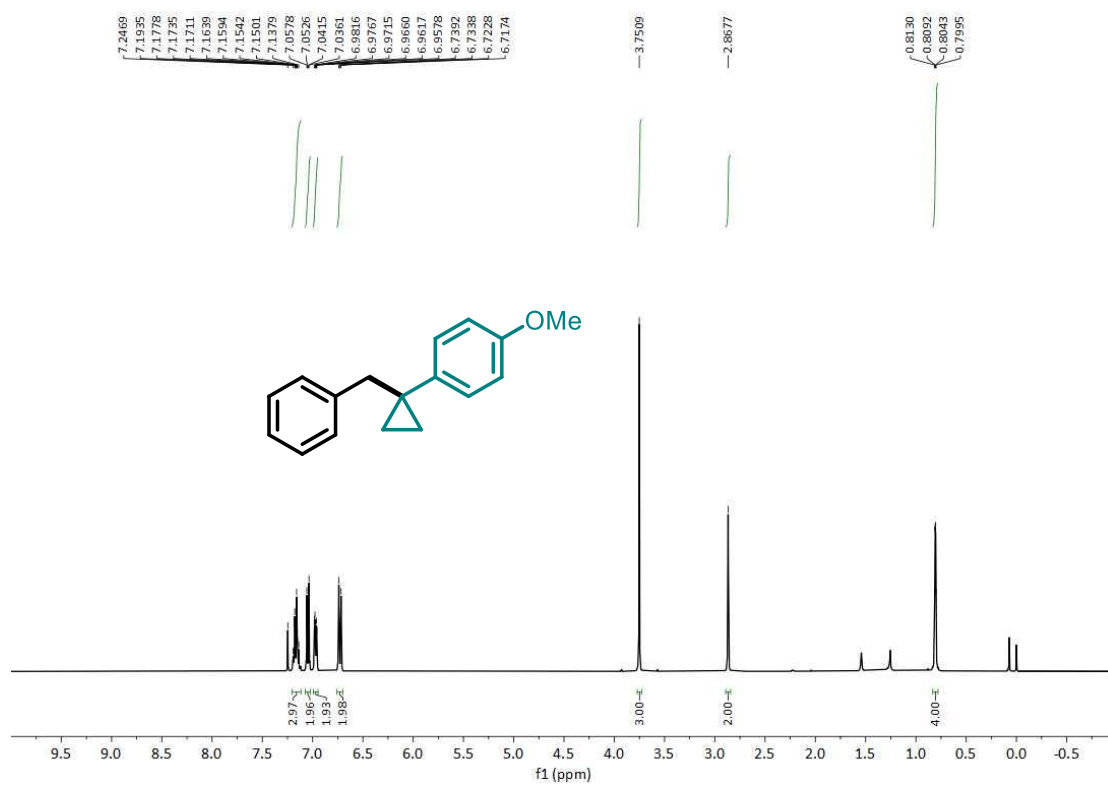

<sup>1</sup>H NMR (400 MHz, CDCl<sub>3</sub>) spectrum of compound **40**

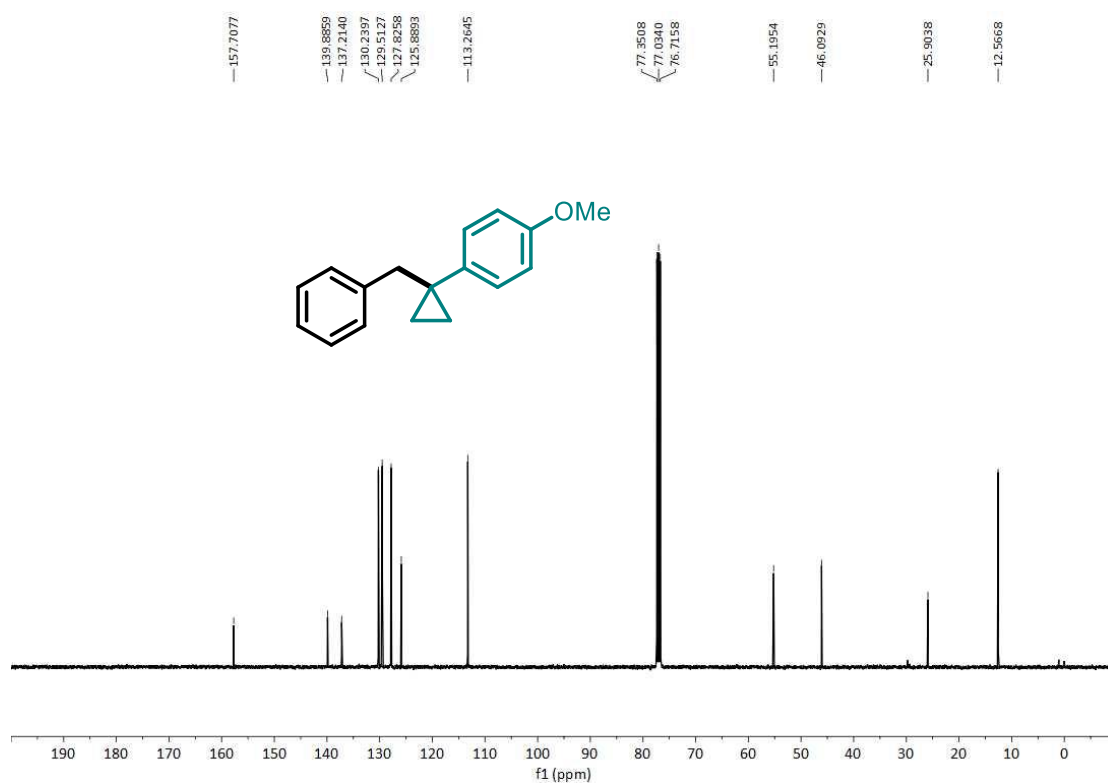

<sup>13</sup>C NMR (100 MHz, CDCl<sub>3</sub>) spectrum of compound **40**

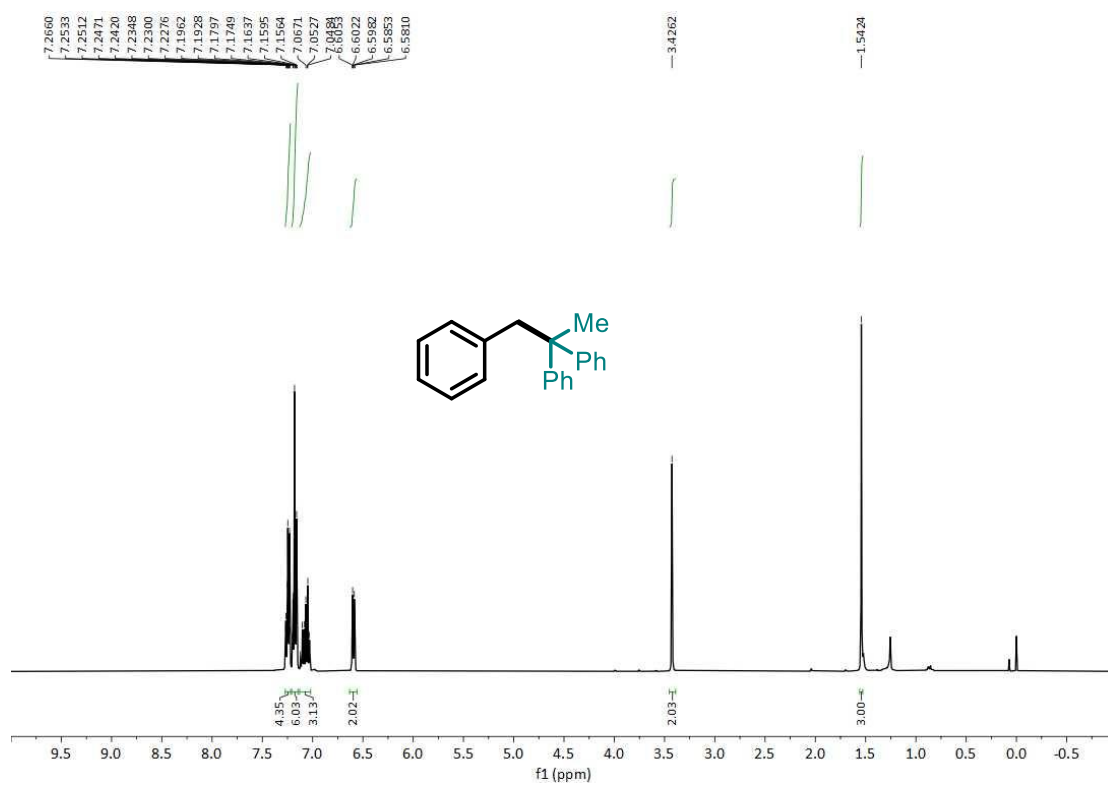

<sup>1</sup>H NMR (400 MHz, CDCl<sub>3</sub>) spectrum of compound **41**

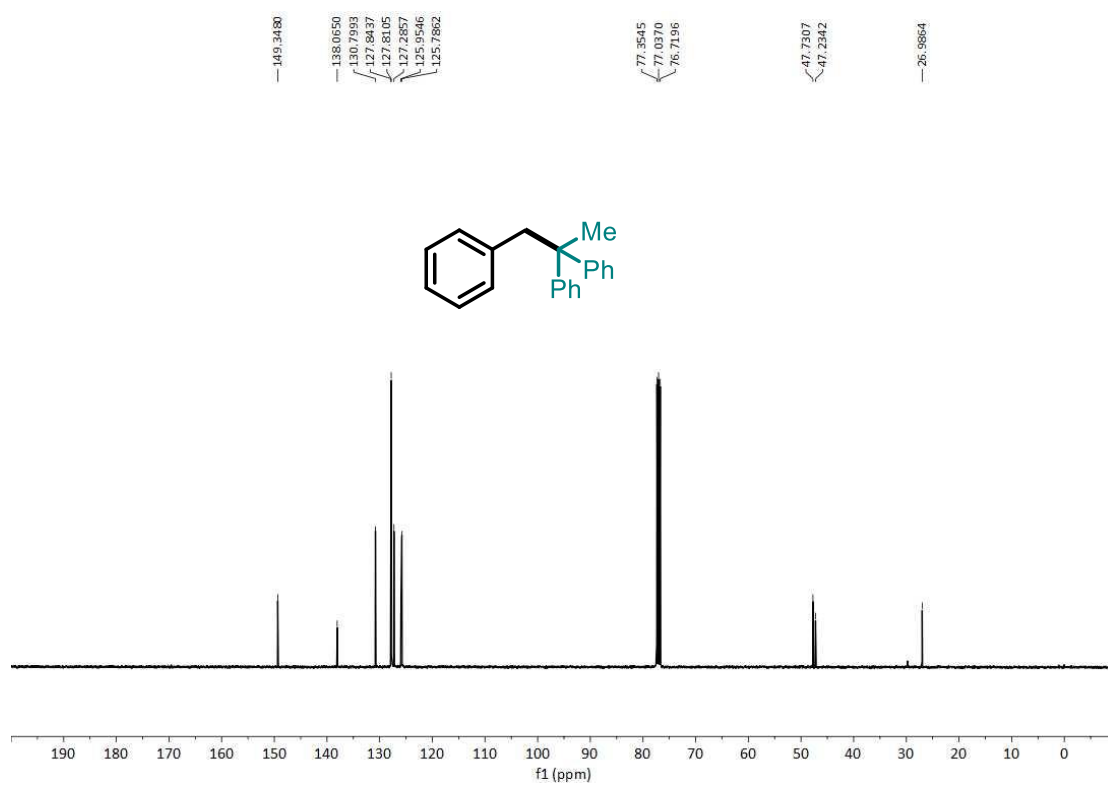

<sup>13</sup>C NMR (100 MHz, CDCl<sub>3</sub>) spectrum of compound **41**

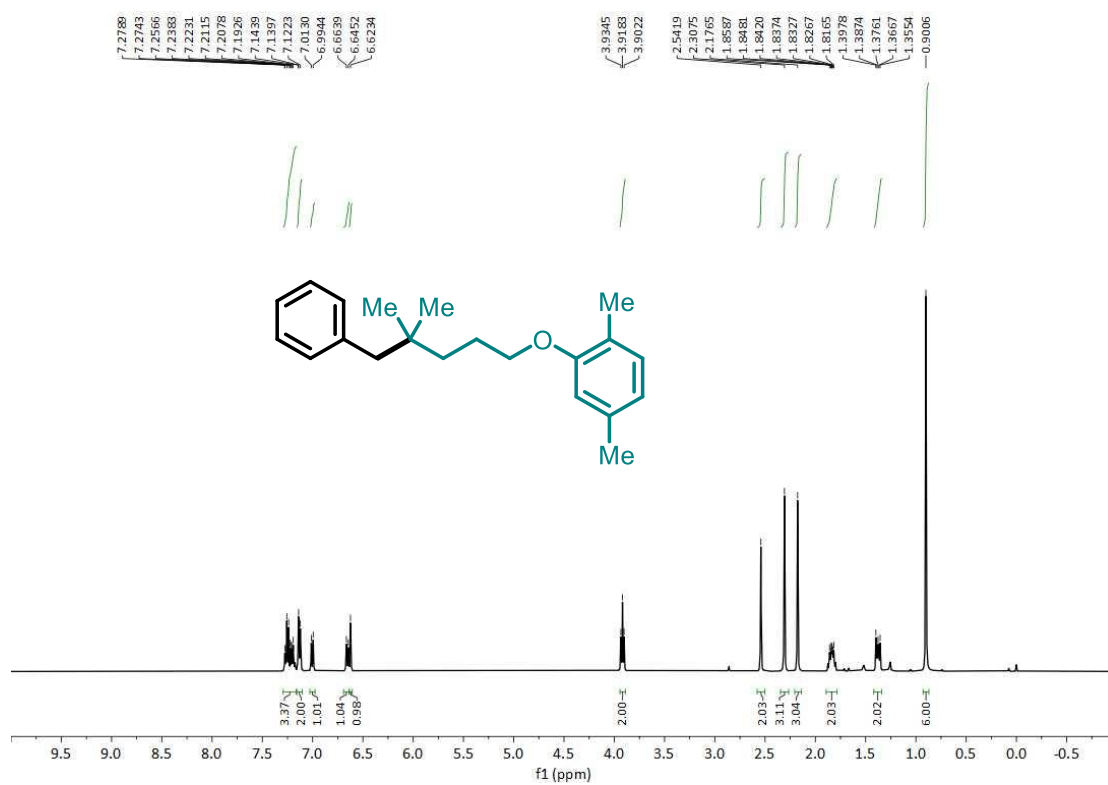

<sup>1</sup>H NMR (400 MHz, CDCl<sub>3</sub>) spectrum of compound **43**

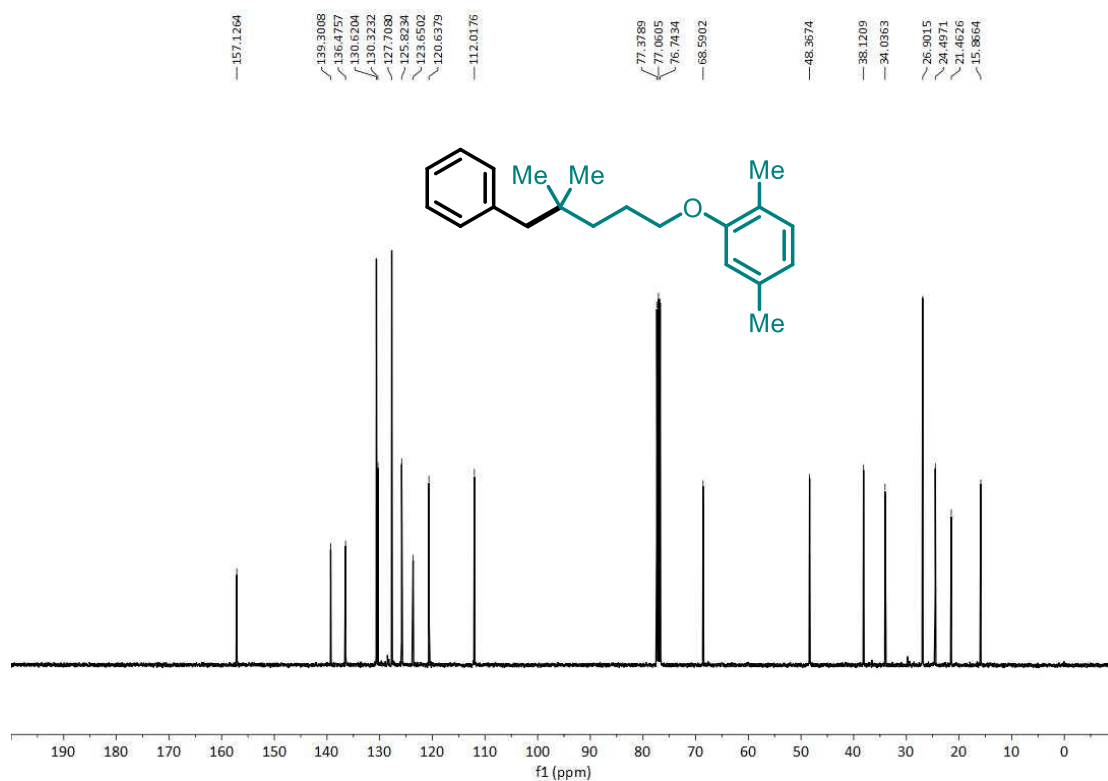

<sup>13</sup>C NMR (100 MHz, CDCl<sub>3</sub>) spectrum of compound **43**

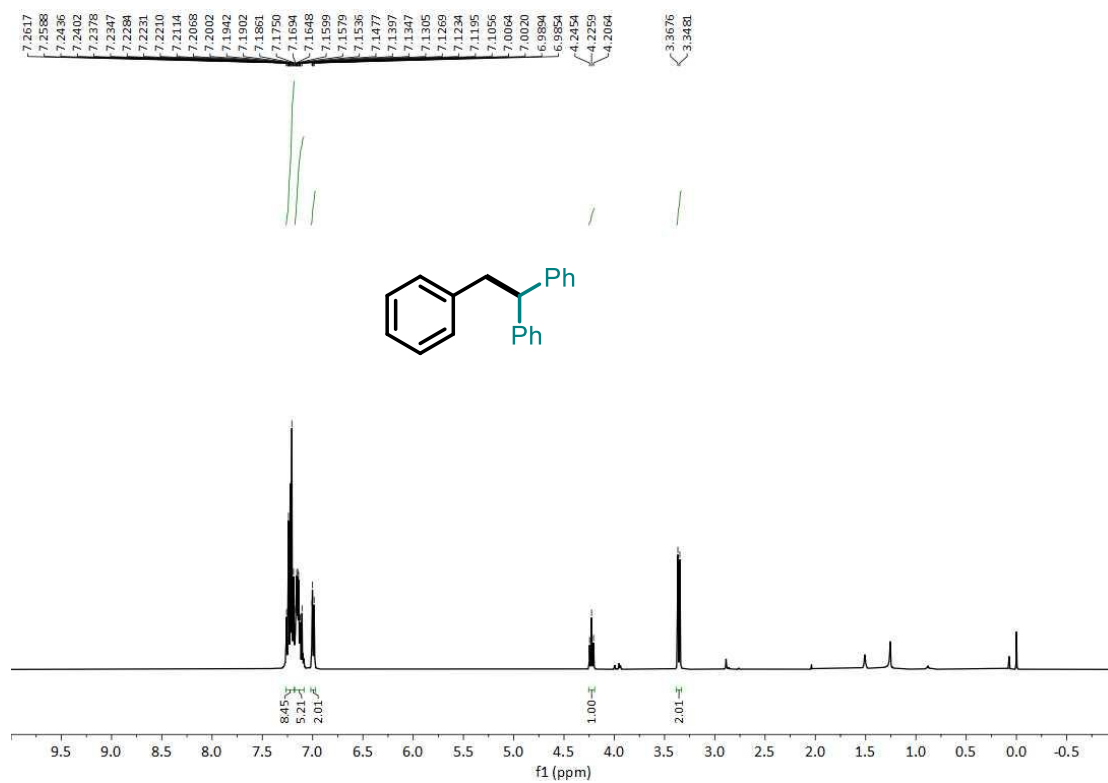

<sup>1</sup>H NMR (400 MHz, CDCl<sub>3</sub>) spectrum of compound **44**

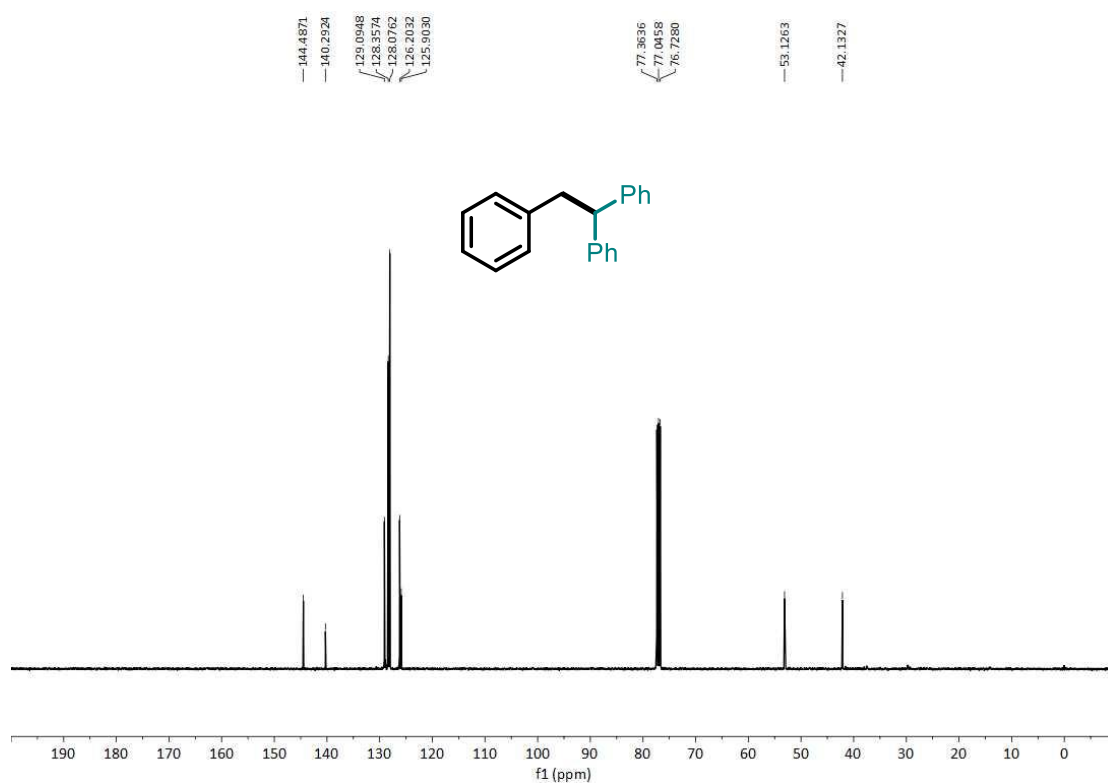

<sup>13</sup>C NMR (100 MHz, CDCl<sub>3</sub>) spectrum of compound **44**

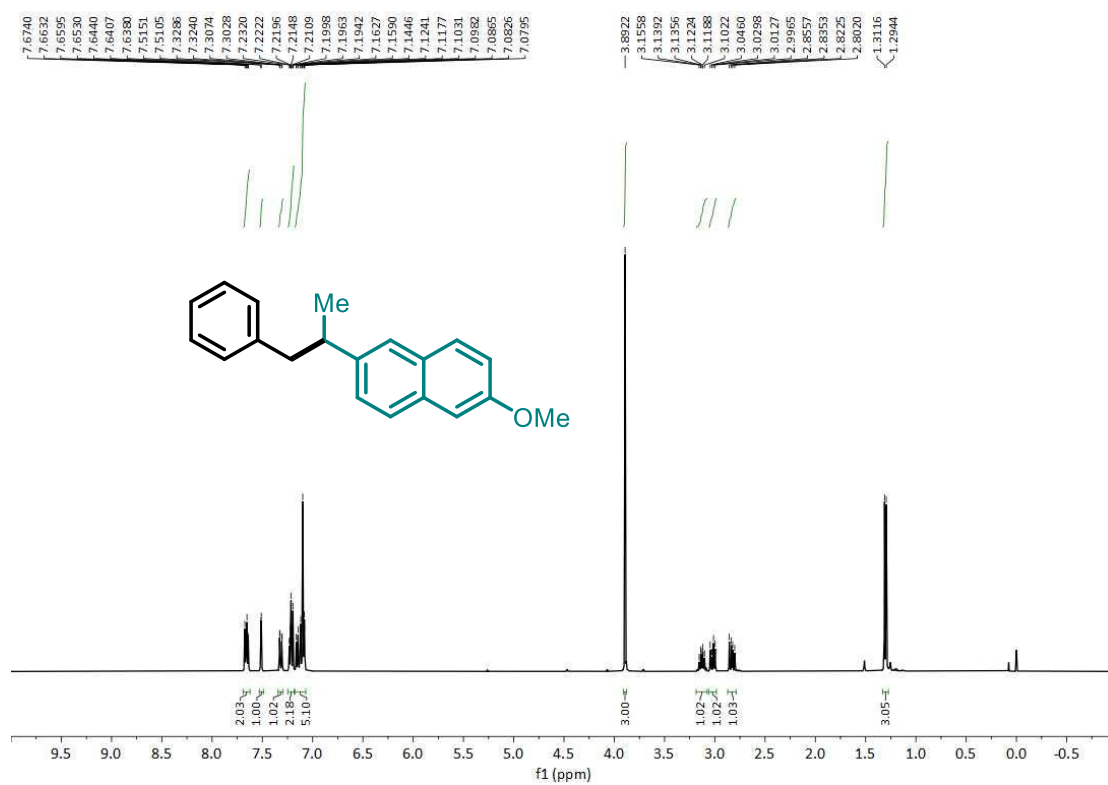

<sup>1</sup>H NMR (400 MHz, CDCl<sub>3</sub>) spectrum of compound **45**

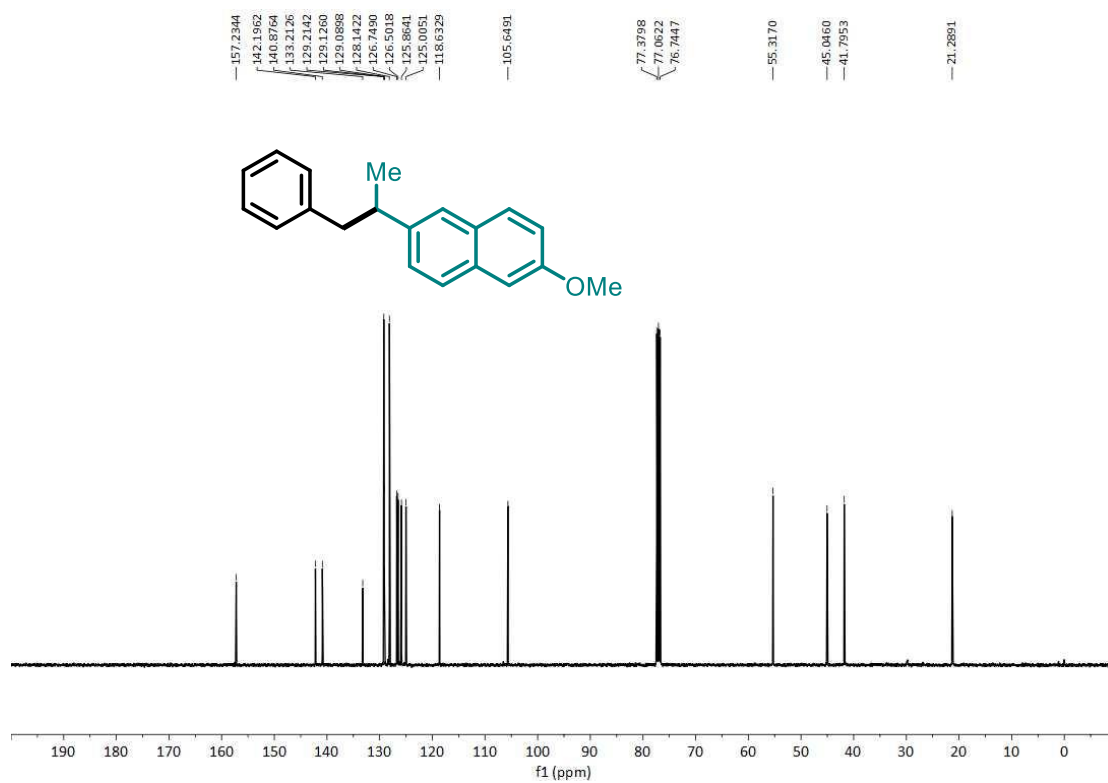

<sup>13</sup>C NMR (100 MHz, CDCl<sub>3</sub>) spectrum of compound **45**

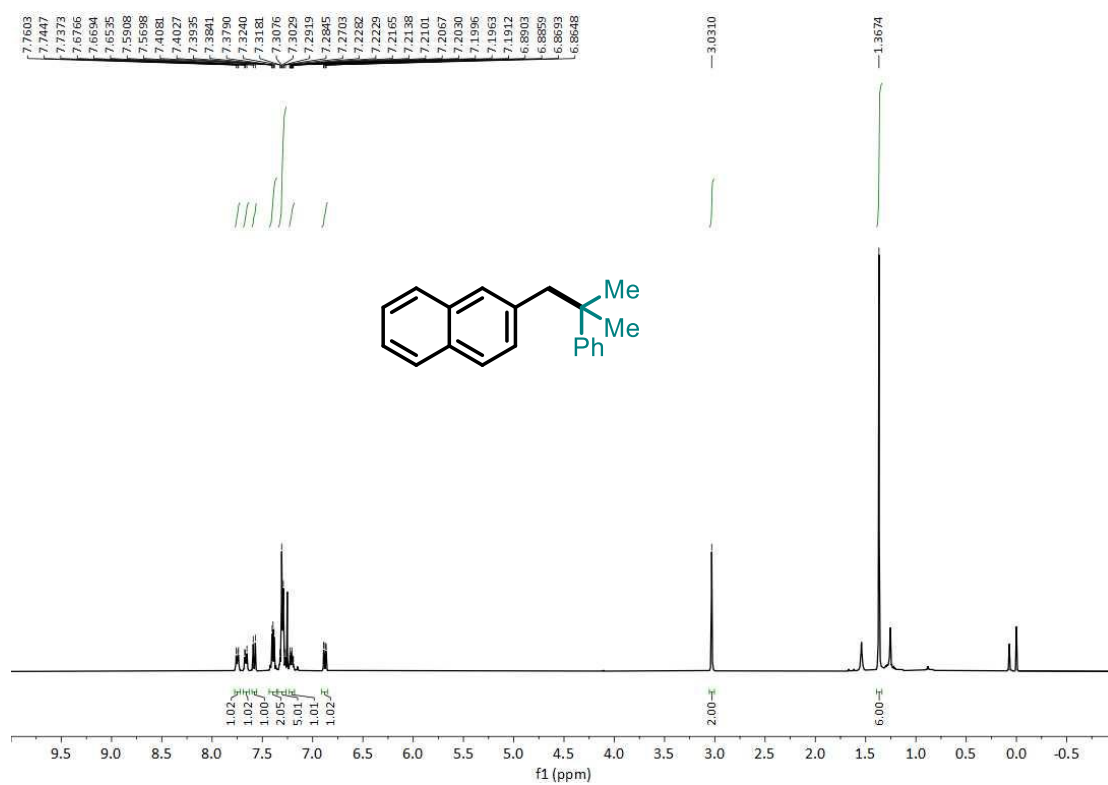

<sup>1</sup>H NMR (400 MHz, CDCl<sub>3</sub>) spectrum of compound **46**

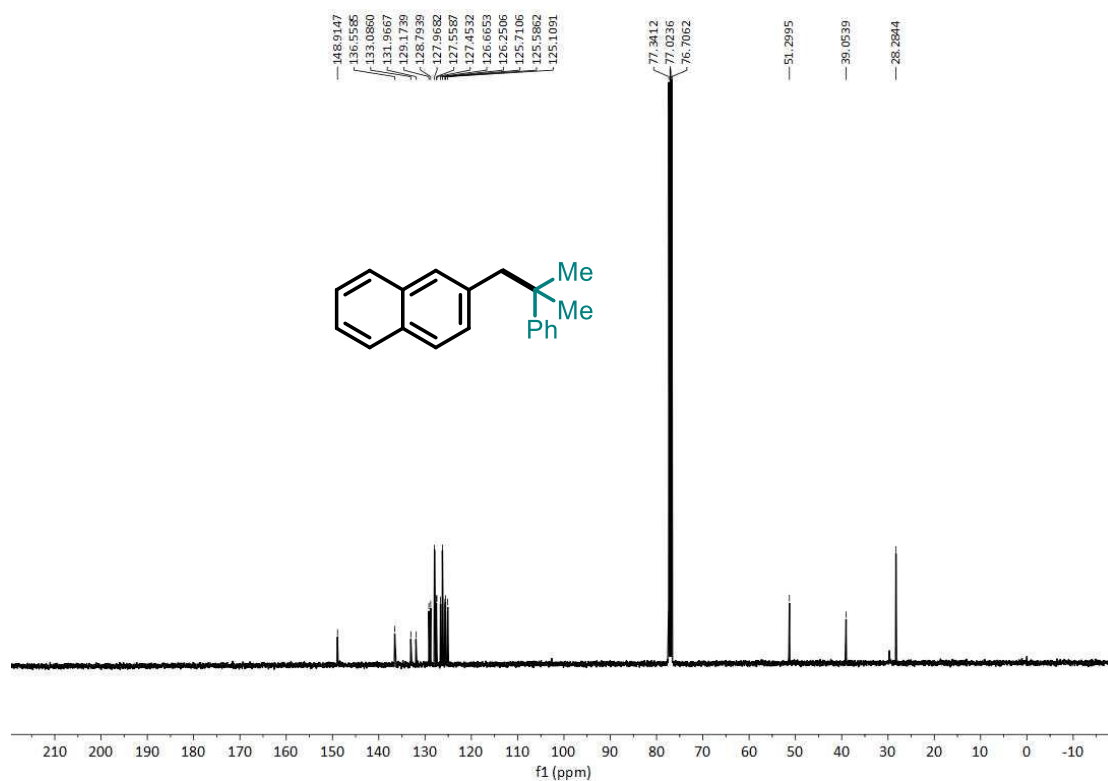

<sup>13</sup>C NMR (100 MHz, CDCl<sub>3</sub>) spectrum of compound **46**

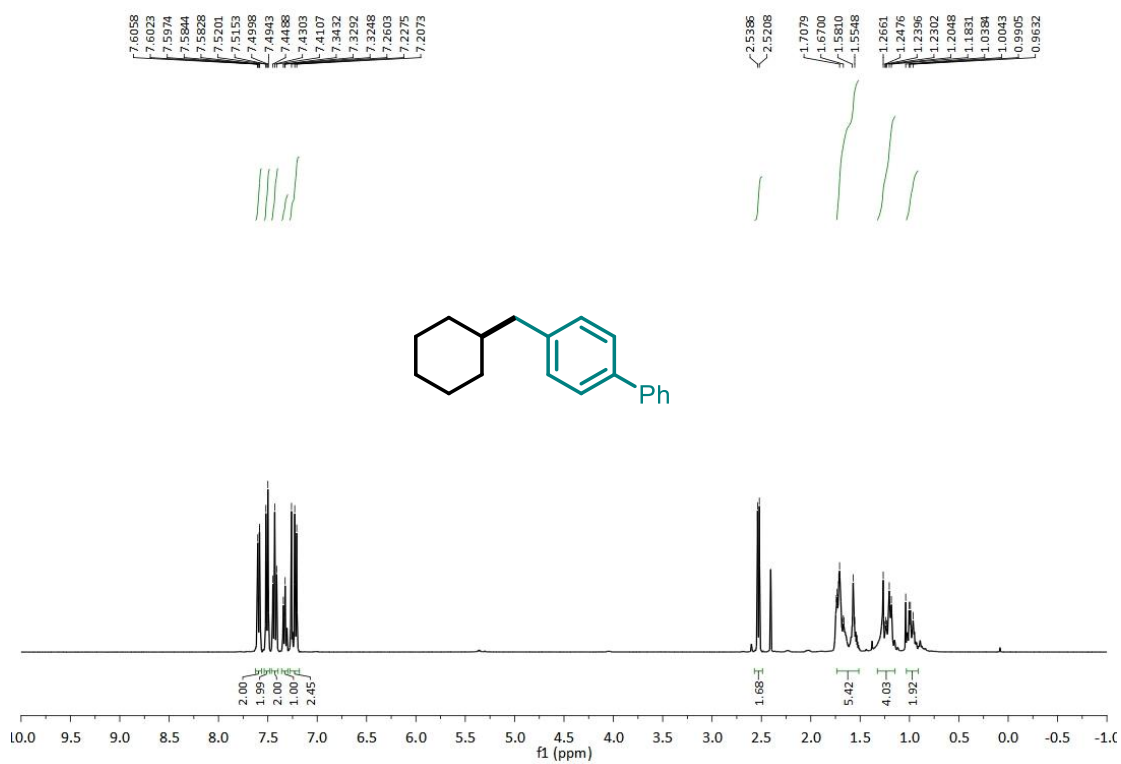

<sup>1</sup>H NMR (400 MHz, CDCl<sub>3</sub>) spectrum of compound **47**

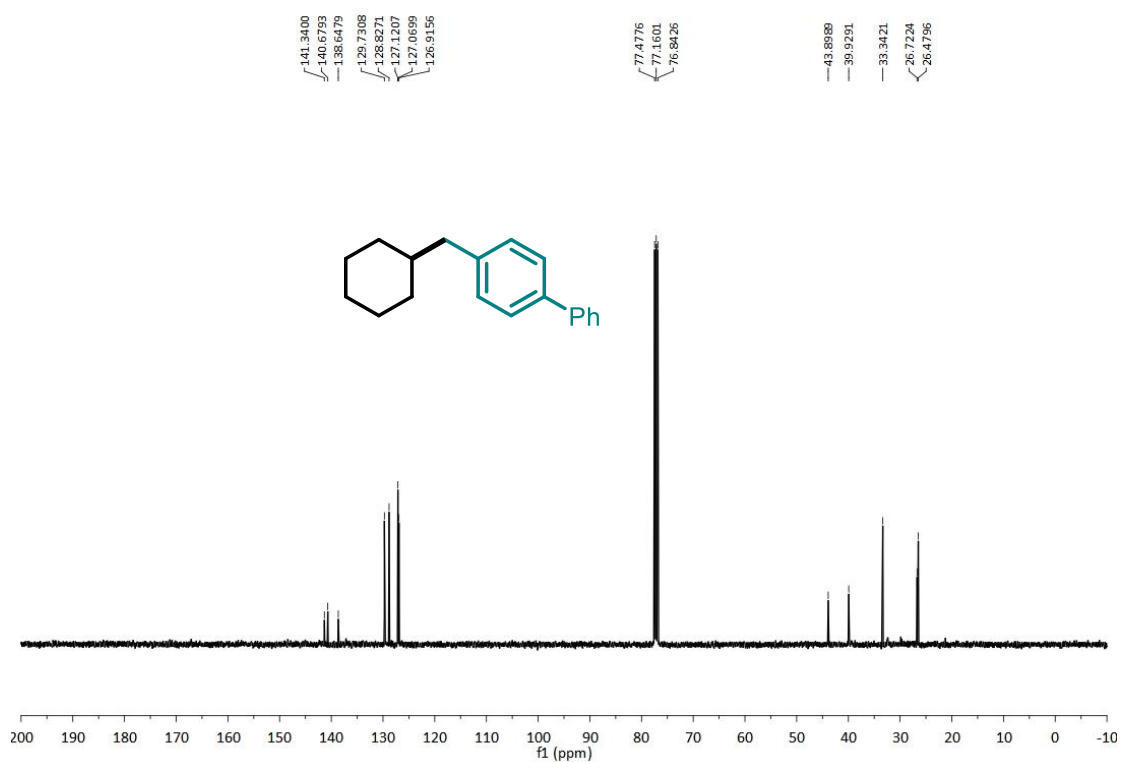

<sup>13</sup>C NMR (100 MHz, CDCl<sub>3</sub>) spectrum of compound **47**

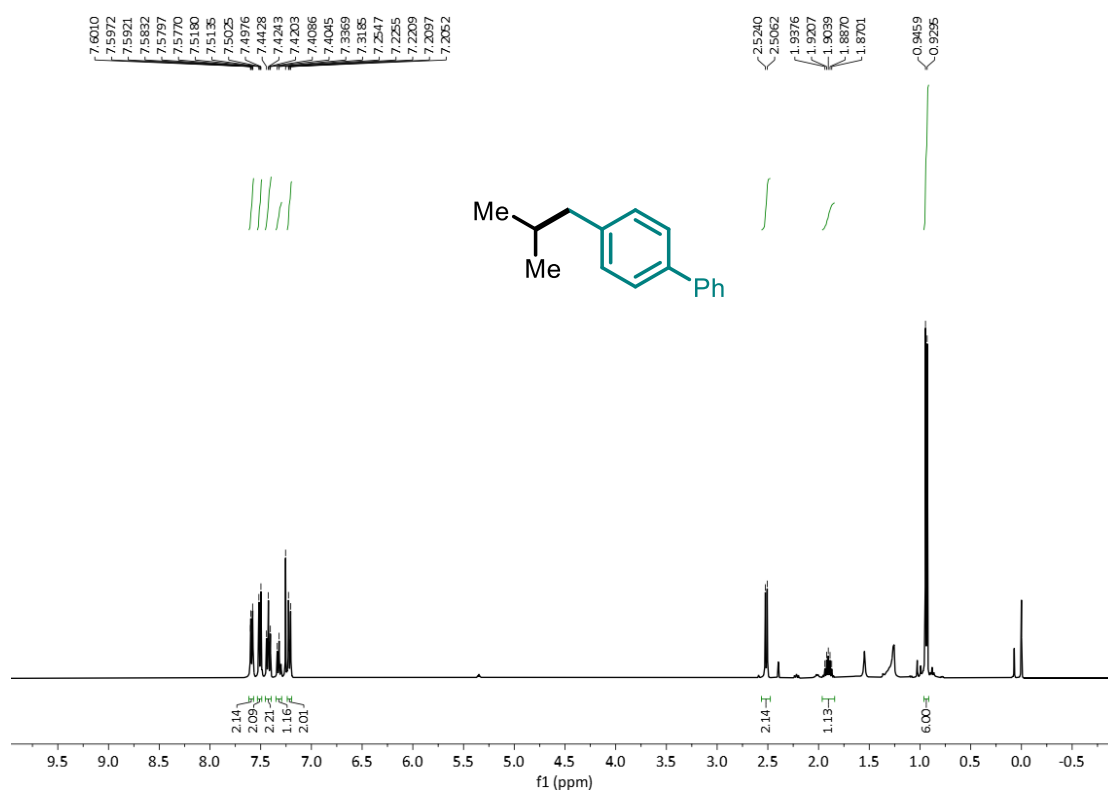

<sup>1</sup>H NMR (400 MHz, CDCl<sub>3</sub>) spectrum of compound **48**

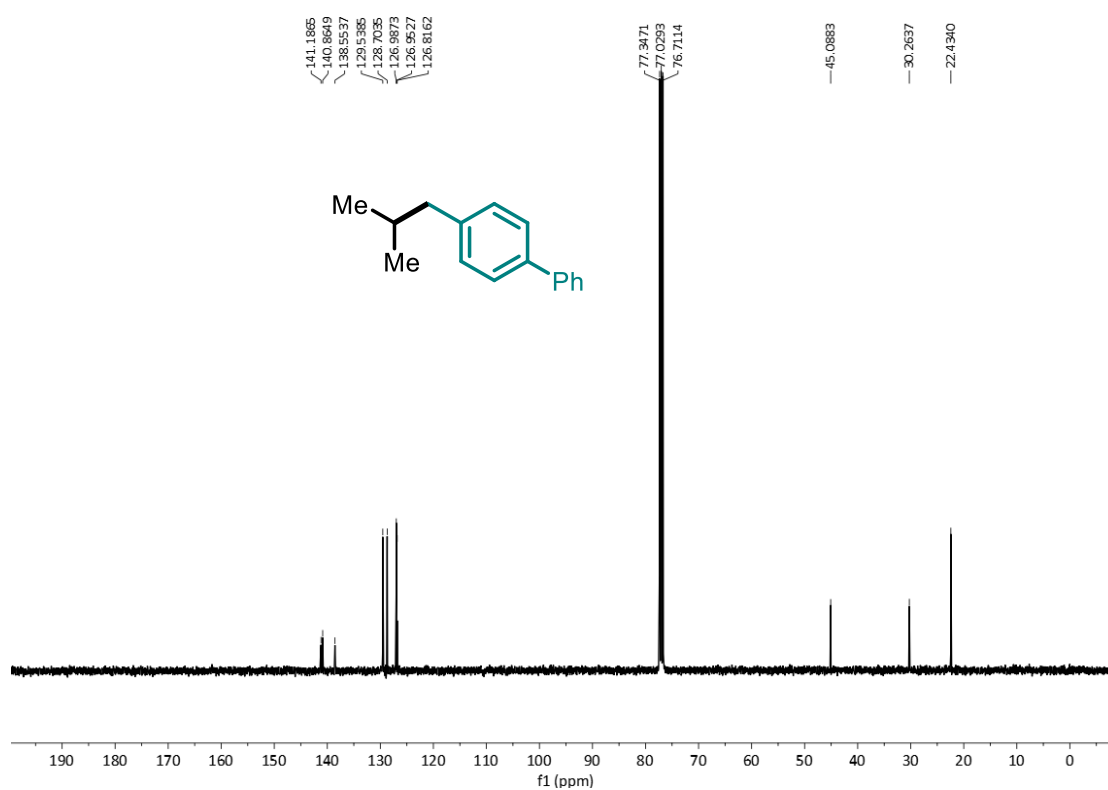

<sup>13</sup>C NMR (100 MHz, CDCl<sub>3</sub>) spectrum of compound **48**

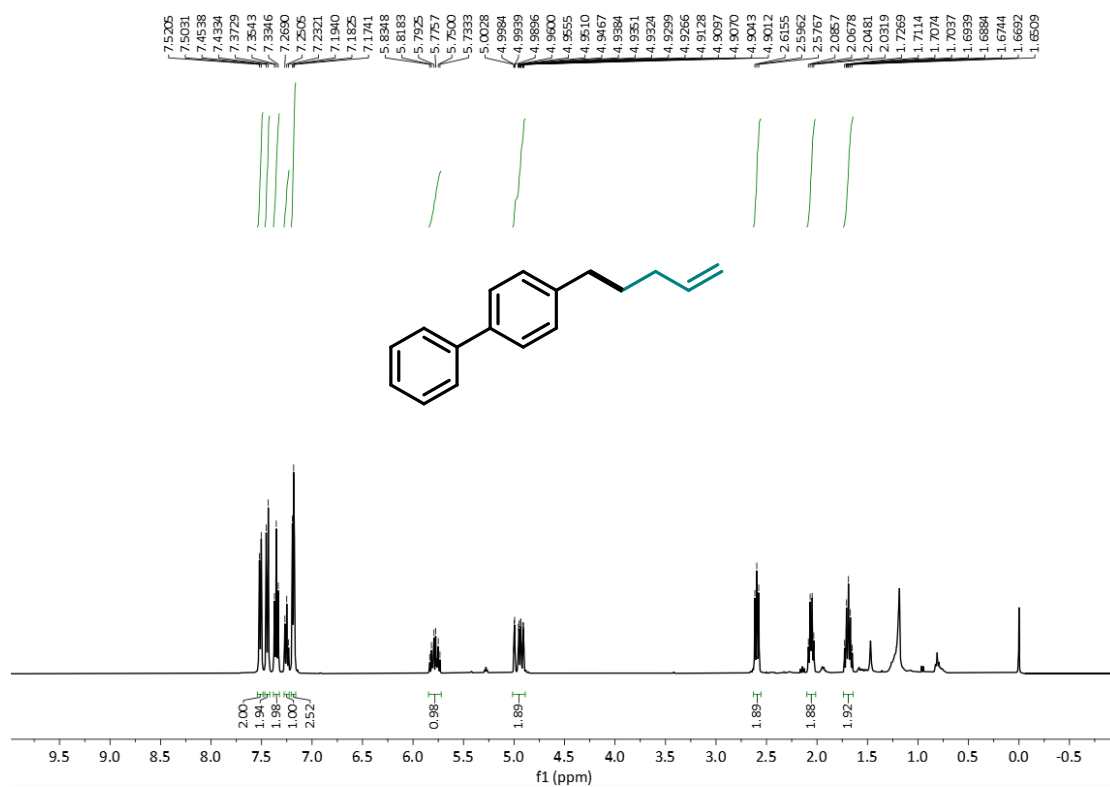

<sup>1</sup>H NMR (400 MHz, CDCl<sub>3</sub>) spectrum of compound **61**

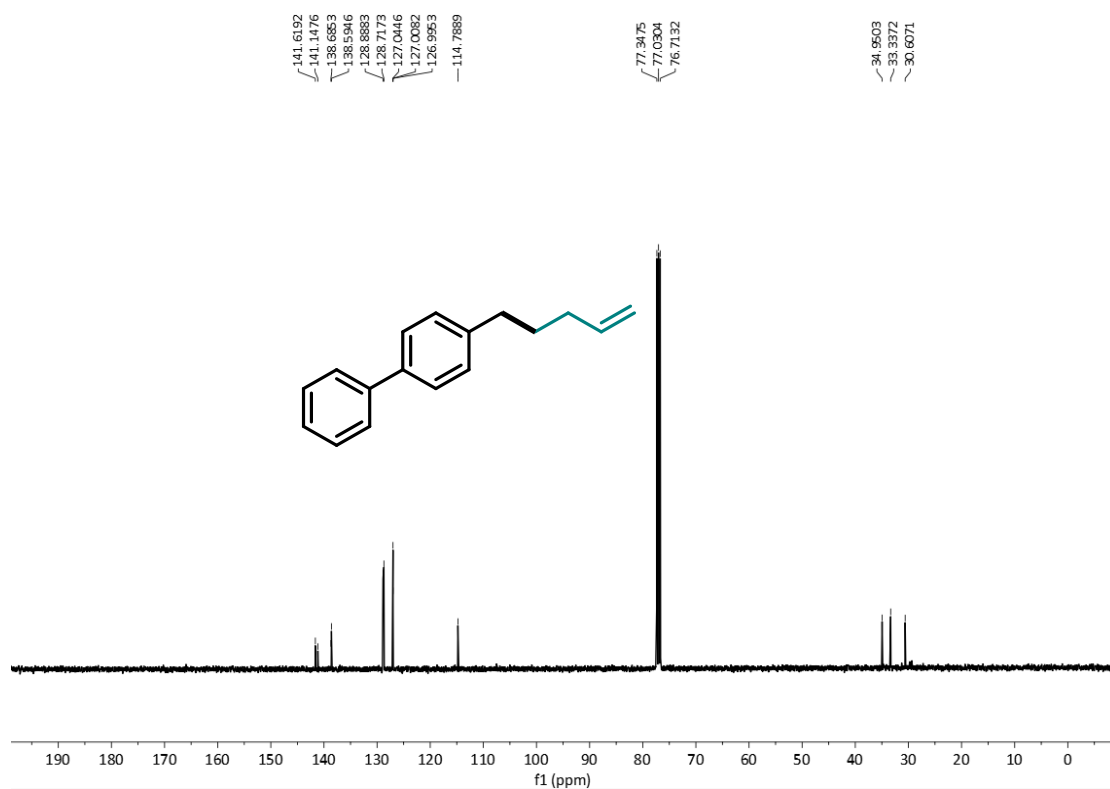

<sup>13</sup>C NMR (100 MHz, CDCl<sub>3</sub>) spectrum of compound **61**
